# Supplementary material for: Transcriptome profiling of Diachasmimorpha longicaudata towards useful molecular tools for population management
Source: BMC Genomics. 2016 Oct 12;17:793. doi: 10.1186/s12864-016-2759-2 (PMC5059965; doi:10.1186/s12864-016-2759-2)
Supplement: Additional file 3: — List of SSRs and primers. (XLSX 856 kb) [file 12864_2016_2759_MOESM3_ESM.xlsx]

## Sheet: Hoja1
Additional File 3 - List of SSRs and primers
Sequence ID	SSR type	SSR motif	Repeats	sequence size	start	end	Identity	Length	Tm	GC%	Product size	Sequence
isotig01602	c	(AAAAAT)5(AAAATA)3(AAATAA)3(AATAAA)5		96	836	931
isotig01603	c	(AAAAAT)5(AAAATA)3(AAATAA)3(AATAAA)5		96	540	635
isotig07711	c	(AAAAT)4aacaataaaataaaatagaaataa(AAAAT)5		69	481	549
isotig00052	c	(AAAT)23(AATA)31		216	1881	2096
isotig00059	c	(AAAT)23(AATA)31		216	395	610
isotig00062	c	(AAAT)23(AATA)31		216	249	464
isotig03671	c	(AAAT)3aagtaatattattgtaataaatttaagggtacaacaatgtaatcaatcgtaaacgttatcatccc(GTAT)3		89	16	104
isotig07783	c	(AAAT)4aaccaggaacaattggcgcattaacatcgaatgagcttcacaatttatcatttcttttgatctgcatagaaaaaaatgaattg(TAAA)3		111	146	256
isotig00561	c	(AAT)7aac(AAT)5		39	503	541
isotig06841	c	(AC)7(CA)6cgccca(CACT)3cacacatacacacaagttgtagagagg(AGA)5		86	2	87
isotig04022	c	(AT)5g(TA)6		23	408	430
isotig04952	c	(AT)5ttatatg(TA)5		27	177	203	F1-04952	24	59.89	54.17	279	ACGAAGCTCGATCTGTCGATCGGT
							R1-04952	24	59.07	54.17		TGGGTCTATCTTTCGCGTCAAGGC
isotig00231	c	(AT)6a(AT)5		23	5205	5227
isotig00232	c	(AT)6a(AT)5		23	4562	4584	F1-00232	20	59.97	70	186	CAGCGAGGCCCTGGAGGACT
							R1-00232	20	59.55	65		CCCTTTCGCCCAACGGGTGT
isotig00233	c	(AT)6a(AT)5		23	3547	3569	F1-00233	20	59.97	70	186	CAGCGAGGCCCTGGAGGACT
							R1-00233	20	59.55	65		CCCTTTCGCCCAACGGGTGT
isotig00234	c	(AT)6a(AT)5		23	1835	1857	F1-00234	20	59.97	70	186	CAGCGAGGCCCTGGAGGACT
							R1-00234	20	59.55	65		CCCTTTCGCCCAACGGGTGT
isotig02624	c	(ATA)5g(TAA)5		31	148	178	F1-02624	20	59.56	70.00	222	GGGGCCTCCGGCATTACGAC
							R1-02624	20	59.07	65.00		GCGACCAGAGCAGCACTCCA
isotig01144	c	(ATCCTC)3ctcttccgatga(CTC)5		45	815	859	F1-01144	23	59.94	56.52	204	TGCAGTCGTTTCTCAGCCTGTGC
							R1-01144	22	59.13	68.18		GGAGACTCCAGAGGGGACCTGG
isotig01145	c	(ATCCTC)3ctcttccgatga(CTC)5		45	815	859	F1-01145	23	59.94	56.52	160	TGCAGTCGTTTCTCAGCCTGTGC
							R1-01145	21	60.18	61.90		TGGCAGGATGTCCGAGTGCCA
isotig06794	c	(CAG)5aagctcccaaagcctcacctccgccaccaccaactccagctgctgctccaccacctccaccacctccagcagctcctgcatctgtcacc(CCA)7		125	550	674
isotig01584	c	(CCA)6ccgccgccaccagcaccaccttcttcgctgctgcta(CTG)6		72	617	688	F1-01584	20	59.70	65.00	198	CATCAGCACCGCCACCGTCA
							R1-01584	20	59.97	60.00		AGCTAAGCAACGCAGCCGCA
isotig01585	c	(CCA)6ggaccacgttcttcgctgctgcta(CTG)5		57	635	691	F1-01585	20	59.97	70.00	194	GCCACCGTCACCTCCAGCAC
							R1-01585	20	59.97	60.00		AGCTAAGCAACGCAGCCGCA
isotig05703	c	(CT)5agaatggtcgtgagattcctctcgagggctgtactagcgtccgactccgagggaaggggact(TGG)5		87	656	742	F1-05703	20	59.96	70.00	187	TCATCCTGGGGGCTGGGCTC
							R1-05703	20	59.62	65.00		CACCCGGTGGCCGTTCCAAT
isotig01384	c	(CT)5ttctttcgctcctctccctg(TCCCTA)4		54	461	514	F1-01384	20	59.97	70.00	220	CAGCACGTGAGGTGCCAGGG
							R1-01384	21	59.38	61.90		TCGGAGAAGTCGCGGGACAGA
isotig04953	c	(CT)6a(TC)5gctcgctcactctttctttcacactctg(TC)7		65	149	213	F1-04953	27	59.25	51.85	140	GCCACGAGTTACTTAGGTACAAGAGCG
							R1-04953	27	59.75	48.15		TGGTAGTTGGCGCATAAAGTCTCTCCA
isotig00830	c	(CT)7ttt(TC)7		31	7449	7479	F1-00830	21	58.03	57.14	166	AGATGGATGCGGGCTACGTGT
							R1-00830	21	59.99	66.67		CGTATCTGCACGAGAGCGGGC
isotig01070	c	(GA)7a(AG)5aa(AG)5aa(AG)5ctaataaggaaacaaaagtactcagaaatttaaattaataacatcacgcaactcctctcactcttattgacattttg(TA)9caaa(AT)6		160	1	160
isotig01071	c	(GA)7a(AG)5aa(AG)5aa(AG)5ctaataaggaaacaaaagtactcagaaatttaaattaataacatcacgcaactcctctcactcttattgacattttg(TA)9caaa(AT)6		160	1	160
isotig00910	c	(GA)9atcaaaattgagacagaaagagagaa(AG)5		54	1750	1803	F1-00910	22	60.05	63.64	253	CGACTCGTGGTCCGACAAAGCC
							R1-00910	20	59.00	65.00		GCCAACCAAACAGGCAGGGC
isotig00911	c	(GA)9atcaaaattgagacagaaagagagaa(AG)5		54	963	1016	F1-00911	22	60.05	63.64	253	CGACTCGTGGTCCGACAAAGCC
							R1-00911	20	59.00	65.00		GCCAACCAAACAGGCAGGGC
isotig02620	c	(GAA)6caggcagaacgaaggagaagccgagattaaaatggaggtggaggaagcttcaacttccgtagaggatg(AGA)9agcaggaggatctagaggagagtatggaaatggaagctgaggagagccaggaaagcacagaccctaaaaaa(AAG)6atgcaggagatcgaggcagctcaagagacaaacgagatagtcgaggccccgactagtg(AGA)5		275	1506	1780
isotig02118	c	(GT)5(CT)5		20	2845	2864
isotig07612	c	(GT)6atgtaagtgta(TG)5		33	395	427	F1-07612	22	60.05	63.64	195	GCTCAAGAGTACTCCCCCGCGA
							R1-07612	24	57.66	50.00		ACACACTTGGTAATGGGCAACTCG
isotig00058	c	(TA)10at(AAAATA)3		40	1	40
isotig00062	c	(TA)10at(AAAATA)3		40	1	40
isotig00063	c	(TA)10at(AAAATA)3		40	1	40
isotig00064	c	(TA)10at(AAAATA)3		40	1	40
isotig00056	c	(TA)43ataat(AAATA)3		106	1	106
isotig00059	c	(TA)43ataat(AAATA)3		106	1	106
isotig00060	c	(TA)43ataat(AAATA)3		106	1	106
isotig00061	c	(TA)43ataat(AAATA)3		106	1	106
isotig06090	c	(TA)5(AT)8		26	416	441
isotig04487	c	(TA)5tg(TA)5atatattacatggctagaaaatttacaacaagttcctaagcgaaattactttagtacttagatatgtata(TG)5		102	183	284
isotig05139	c	(TA)6(CATG)3(CATA)4		40	811	850
isotig00231	c	(TA)6t(TA)5		23	5466	5488	F1-00231	20	59.97	70	186	CAGCGAGGCCCTGGAGGACT
							R1-00231	20	59.55	65		CCCTTTCGCCCAACGGGTGT
isotig00232	c	(TA)6t(TA)5		23	4823	4845
isotig00233	c	(TA)6t(TA)5		23	3808	3830
isotig00234	c	(TA)6t(TA)5		23	2096	2118
isotig04697	c	(TA)7tttattaaaccttgtgttttttttgcctgcttgggagcgctatgccatatctgctgctattgttgattccattttgttgttcttgttc(TTG)5		117	76	192	F1-04697	26	57.82	42.31	265	TGTTGCTGTGATTTTGCTGTTCTTGC
							R1-04697	24	59.66	54.17		GCTATGTGATGCGCTCCAGTTCGT
isotig03321	c	(TAA)5acaaataagaaaaaaaatacaattcagtatttgagtggagtaaaaagatgtctgtgtacttgagtgcggaggaatttcgagtaaaacttaatgaag(ATTA)3		123	983	1105	F1-03321	24	57.30	50.00	235	CGTTTTCCACTCGTTACTAGGCGT
							R1-03321	23	57.57	52.17		ACTCGATTCACCTTCATCGGGGT
isotig00832	c	(TAA)5tcttgcatattttgtatcataattcattaatttaaatatttatattcattatgtatagcgtatttcaaatacgaccacttttcgctcga(TC)8		120	1663	1782
isotig00833	c	(TAA)5tcttgcatattttgtatcataattcattaatttaaatatttatattcattatgtatagcgtatttcaaatacgaccacttttcgctcga(TC)8		120	1663	1782
isotig02188	c	(TAAA)3taataaaattcttactaaagttataatagacccaaaagaagaaacaatatttcaag(AT)6		80	1223	1302
isotig01900	c	(TACA)5tacg(TA)5		34	333	366
isotig00050	c	(TAT)5tagaaactggagtttcaattattcaatcttatgtttttgttattttaataattttatatttaaaagaaac(TAAT)3		97	1611	1707
isotig08282	c	(TATG)3catatgtataaaaatgtcaacatcgccttgtaaatgcgttggcaatattaaaataattacatatattatttgcataataagactcatttctt(TAA)6		122	330	451
isotig08078	c	(TATG)3cgcactaaatcgtttgaataataatctataaaaaaaaatat(TAA)5		68	118	185	F1-08078	26	58.68	50.00	225	TGCGAGCTAACTGAACGTAGAGTGTC
							R1-08078	20	60.25	60.00		TTGCCAGCGCCAGCGCTAAA
isotig07118	c	(TC)6(TA)7		26	93	118	F1-07118	27	57.56	40.74	194	TGAAAGAACTAACCGATTTTGCAACGC
							R1-07118	20	57.64	60.00		ATCCCAGAGACTCGCGCCAT
isotig08427	c	(TC)6cctct(TC)35		87	203	289
isotig02329	c	(TC)7tgtctc(TCTT)4		36	1776	1811	F1-02329	20	58.79	60.00	198	ATGGCGTTACCGAAGGGCGT
							R1-02329	20	58.17	60.00		AGTGGCTCGCGAAGAGAGCA
isotig04030	c	(TCA)6tt(ATC)10		50	1	50
isotig02378	c	(TCATCC)3tcgtcatcgtcatcgtcgtcttctgaagcagctttaggagaaatttgtttgcttcccttaaacttcttcacaccttttttcacctccacttt(CTC)5atcc(TCA)5cttccttcgaaatcttcatcatcttcgtccgaagaattagcgaggctctctcccaggatgttgggagt(CTC)5		227	1546	1772
isotig06668	c	(TCGT)3cggctcc(TCG)6		37	25	61	F1-06668	20	60.75	65.00	132	AAGTGCGGAGGTGCCAGGCT
							R1-06668	24	59.82	54.17		TCCTTGCTCTCTTGGTTCACGGGT
isotig04066	c	(TGA)5tggtgatagtcctttcgacttctctcctcctttgatttcttcc(TCT)5		73	366	438	F1-04066	22	59.86	59.09	188	ACTCGCTCGTGGTGGACTTGGA
							R1-04066	20	59.83	65.00		ACGAGCCTTCGACCCCCACA
isotig02730	c	(TGA)6(GGATGA)3		36	890	925	F1-02730	23	59.62	60.87	200	GGGGAAGAAGGTGGTTGCCAAGG
							R1-02730	22	58.14	59.09		CATCACTCTCGGCTTCCTCGGT
isotig02457	c	(TGCTCA)3agctcattttgttcaatttgggcatctctcgatcatcagta(GACC)4		75	679	753	F1-02457	25	57.31	44.00	219	AACTAGCGTTGTGGTTGCTATCGTT
							R1-02457	25	59.02	48.00		ACGCGTAAGACTTGTTACGGTTCGT
isotig01968	c	(TTCTGG)3ttcttggttctacttctggttctacttctggttctacttctggttctac(TTCTGG)4		91	89	179	F1-01968	27	57.28	44.44	246	ACTTCTGGTTCTACTTCTGGTTCTGGT
							R1-01968	21	57.29	61.90		GAACCTGCTCCCGAATCCGAC
isotig07737	c	(TTG)5ctagcttataattcctcagttcattaaaattgttctgaatgtattagatgtggatgcggatgaggatgtggatgtgattaatgttgttgtcg(TACA)3		119	38	156
isotig05757	c	(TTG)5ttttcgttgttacgtctgatgttctttttggtctatatccaccccatccaccggcaccatgctcacttgtctccatgatctaca(TG)5		109	139	247	F1-05757	27	58.49	48.15	282	GGTCACTCAGTACTGTTGTTGGACTGT
							R1-05757	20	59.56	65.00		TGCACATGGGCCTATCGCGG
isotig02010	c	(TTTA)3tttg(ATTT)3		28	3491	3518	F1-02010	21	59.18	57.14	172	TGCAATCTGAGGATGGCGCGT
							R1-02010	24	59.13	54.17		TCGTGGCAACTGATAATCGAGGGC
isotig00065	c	(TTTA)51(TTAT)6		228	1	228
contig00069	c	(TTTTA)3at(TTTA)3		29	857	885
isotig00559	c*	(AAAAAT)4(AAAAT)4*(AAAT)7*aataataata(AAT)7aac(AAT)5		112	2351	2462
isotig00560	c*	(AAAAAT)4(AAAAT)4*(AAAT)7*aataataata(AAT)7aac(AAT)5		112	2270	2381
isotig08435	c*	(AAAAT)3(AAATAA)16(AATAAA)3(AAAAT)30*		271	1	271
isotig07264	c*	(AAAT)4(AAT)5*(TAA)9(AATAA)3*		65	537	601
isotig01362	c*	(AAAT)4(AAT)6*(TAAT)5*(TA)12		71	1240	1310
isotig01363	c*	(AAAT)4(AAT)6*(TAAT)5*(TA)12		71	1113	1183
isotig06951	c*	(AATT)3(TAA)8*		35	62	96
isotig06851	c*	(GTTGCT)3(TGC)6*		32	383	414	F1-06851	22	59.61	54.54	186	TGCTTCTGCTGCTGCGTTTCCT
							R1-06851	20	59.63	60.00		TCGAAAGACGTGCGCTGCCA
isotig01954	c*	(TA)25(ATA)5*(AATA)4*aaat(AAATA)5		103	1	103
isotig08179	c*	(TTA)6(TA)5*		26	446	471
isotig06402	c*	(TTA)7(TTAT)3*(TTTAT)5*(TTTTAT)3*tttttattttttat(TTTTTA)3		94	1	94
isotig08275	c*	(TTTTA)4ttttta(TTTTAT)3(TTTTA)4*t(TTTTA)6t(TTTTA)5		115	12	126
isotig00715	p2	(AC)5	2	10	998	1007	F1-00715	21	59.92	61.90	106	TGTTGAAGCCAGCCCCGAACG
							R1-00715	26	57.09	42.31		ACCGACGTATGACGGAGCAATAATTT
isotig00716	p2	(AC)5	2	10	998	1007	F1-00716	21	59.92	61.90	106	TGTTGAAGCCAGCCCCGAACG
							R1-00716	26	57.09	42.31		ACCGACGTATGACGGAGCAATAATTT
isotig01132	p2	(AC)5	2	10	1668	1677	F1-01132	22	59.99	59.09	200	CGAGGTGATGCTGTTGCACGGT
							R1-01132	20	60.46	70.00		CTGTCCGGCCCACCCTGTGA
isotig01407	p2	(AC)5	2	10	996	1005
isotig02309	p2	(AC)5	2	10	2230	2239	F1-02309	22	59.21	59.09	235	ACCCATTGGCCCACCATCATCG
							R1-02309	21	59.00	57.14		TGACGGTGCTTTGGTCGTCGT
isotig08314	p2	(AC)5	2	10	204	213
isotig04561	p2	(AC)6	2	12	86	97
isotig07060	p2	(AC)7	2	14	616	629
isotig02715	p2	(AG)10	2	20	1561	1580
isotig05500	p2	(AG)33	2	66	799	864
isotig00443	p2	(AG)5	2	10	2242	2251	F1-00443	20	59.63	65.00	222	AAGGACACGACACGGCACGG
							R1-00443	22	59.39	63.64		CCCTGTCATTCCCTCCCCGTCT
isotig00444	p2	(AG)5	2	10	2242	2251	F1-00444	20	59.63	65.00	222	AAGGACACGACACGGCACGG
							R1-00444	22	59.39	63.64		CCCTGTCATTCCCTCCCCGTCT
isotig00862	p2	(AG)5	2	10	462	471
isotig02411	p2	(AG)5	2	10	402	411	F1-02411	20	59.90	65.00	201	ACGGCCGACTGGAGGAACGA
							R1-02411	21	60.37	61.90		GCGCAACGAAGGAAAACGCGG
isotig02735	p2	(AG)5	2	10	1272	1281	F1-02735	22	57.55	50.00	202	TGTTGCTGCTGCTGTTCCTTGT
							R1-02735	20	60.32	65.00		GCATCGCAGTTGGGTGCCGA
isotig02954	p2	(AG)5	2	10	936	945	F1-02954	24	59.41	54.17	208	ACGACAAGGCTGGTCTACTGACGA
							R1-02954	22	59.98	63.64		CCTCCGGCCACATCTGTACCCA
isotig03470	p2	(AG)5	2	10	664	673	F1-03470	20	59.83	65.00	200	GCAGCCCTGGCGATGCTGAT
							R1-03470	20	59.76	65.00		ATGATGCCGGTGGCGTTCCC
isotig03776	p2	(AG)5	2	10	1110	1119	F1-03776	23	58.52	52.17	202	TCACTGGAGTGTGGCACGAATGT
							R1-03776	21	57.49	57.14		ACAACATCGCCACTACCGCTG
isotig04171	p2	(AG)5	2	10	592	601	F1-04171	22	59.72	68.18	257	GCAACTACCCCCTCCCTCCTCC
							R1-04171	27	57.34	48.15		TTCAGAGTAAGTCCCCCTACCCTTAGA
isotig05816	p2	(AG)5	2	10	529	538	F1-05816	20	60.32	70.00	231	GCACGTCCTGCCCGACACTG
							R1-05816	20	59.35	65.00		CCGCACTCTGCCTGCCTGAA
isotig06881	p2	(AG)6	2	12	307	318	F1-06881	20	59.97	65.00	257	AGGATGCTGGCCAACCGCAC
							R1-06881	24	59.47	58.33		GCCTTCAATCGGATAGCTCCAGCC
isotig02118	p2	(AG)7	2	14	462	475
isotig04939	p2	(AG)7	2	14	69	82
isotig08061	p2	(AG)8	2	16	244	259	F1-08061	27	57.26	44.44	142	TGACACTACGTCAAGACAATTGGTCAG
							R1-08061	23	57.31	47.83		ACACCAAGTGGCCTTTGCTTTCT
isotig04668	p2	(AT)10	2	20	244	263	F1-04668	21	58.33	61.90	280	TCTCACCTCGAGTCCCACCCA
							R1-04668	25	57.65	48.00		ACCTCAAAAAGAAGAGAGCGAGGGA
isotig06470	p2	(AT)11	2	22	558	579
isotig00034	p2	(AT)5	2	10	3552	3561	F1-00034	21	59.12	61.9	261	CCGGATGAAGTGCCGTGTGGA
							R1-00034	20	58.1	60		TCTGACCACTTCGCGGCTGA
isotig00611	p2	(AT)5	2	10	1304	1313
isotig00612	p2	(AT)5	2	10	1274	1283
isotig00613	p2	(AT)5	2	10	301	310
isotig00844	p2	(AT)5	2	10	1391	1400	F1-00844	25	58.08	48.00	200	TGAAATTTCCTCCAGAAGGCACCCT
							R1-00844	25	57.29	48.00		GTGCACTTTTAAAGGAACACACGGG
isotig00845	p2	(AT)5	2	10	820	829	F1-00845	25	58.08	48.00	200	TGAAATTTCCTCCAGAAGGCACCCT
							R1-00845	25	57.29	48.00		GTGCACTTTTAAAGGAACACACGGG
isotig01160	p2	(AT)5	2	10	1045	1054	F1-01160	25	58.81	52.00	214	TGGCCTCCATAAGTACTTTTCCGCC
							R1-01160	20	60.25	70.00		GCCCTGTTGTCACGCTGGGG
isotig01161	p2	(AT)5	2	10	1045	1054	F1-01161	22	57.64	54.54	248	TCTCTGATTCTGCATTGCCGCC
							R1-01161	20	60.04	70.00		CGGACCGAGCCACCCGAAAC
isotig01792	p2	(AT)5	2	10	59	68	F1-01792	21	60.11	66.67	284	CCGAGCCACTTCATCACGCCC
							R1-01792	20	59.17	65.00		ACCCGTACTGGTGCTGGGGA
isotig01793	p2	(AT)5	2	10	59	68	F1-01793	21	60.11	66.67	191	CCCGAGCCACTTCATCACGCC
							R1-01793	21	60.37	66.67		GCCGCTTTGGAGGAAGCGGAG
isotig02010	p2	(AT)5	2	10	3070	3079
isotig02161	p2	(AT)5	2	10	62	71
isotig02305	p2	(AT)5	2	10	941	950	F1-02305	20	59.29	65.00	276	CGACGCACACCCCACTGTCA
							R1-02305	22	57.43	59.09		CCATGAGGCGTACGTCAAGTCC
isotig02351	p2	(AT)5	2	10	78	87	F1-02351	27	57.13	40.74	164	AGCACGTTGCTATATCACTGTCATGTT
							R1-02351	24	58.61	50.00		TCAACGTAACAGACTGACGTGCCA
isotig02523	p2	(AT)5	2	10	463	472	F1-02523	20	59.15	70.00	189	GAGACGTTCGGGGGTGAGGC
							R1-02523	22	58.41	54.54		TCGCCTGAATCCTACAACGCGA
isotig02712	p2	(AT)5	2	10	60	69
isotig03254	p2	(AT)5	2	10	986	995	F1-03254	21	59.65	61.90	1197	GCCACGTGTTGTGGGATCCGT
							R1-03254	20	60.25	65.00		TCGCGGAAGCCGAGAGTGGT
isotig03255	p2	(AT)5	2	10	1494	1503
isotig03376	p2	(AT)5	2	10	555	564
isotig03469	p2	(AT)5	2	10	68	77	F1-03469	23	60.06	56.52	269	CGCCGACAAATTAAGGCGTCCCA
							R1-03469	20	60.11	65.00		TTATGGCGGCACACTCGGCG
isotig03510	p2	(AT)5	2	10	197	206	F1-03510	20	58.12	60.00	282	ACGGTTCTTTGCAGGGCACG
							R1-03510	23	59.50	52.17		ACAGTGCGAGGCCAAAAGTTGGT
isotig03556	p2	(AT)5	2	10	457	466	F1-03556	22	59.19	59.09	227	TGGTGCCAGAGGAGGGAACTGT
							R1-03556	20	57.08	55.00		TGGCAGTGACAATGGCAGCA
isotig03910	p2	(AT)5	2	10	332	341	F1-03910	24	57.78	50.00	167	TGTTCCCGGTATTCCACAGAACCA
							R1-03910	23	57.56	52.17		TCTATTTGGCGAAGAGAGGGGCA
isotig03946	p2	(AT)5	2	10	219	228	F1-03946	20	59.92	65.00	286	CGAGCGCACGAACGCGAAAG
							R1-03946	21	57.06	52.38		TCGCCCGTGAGTGCAGAATTT
isotig04239	p2	(AT)5	2	10	388	397	F1-04239	21	59.21	66.67	297	CCCCCTTCCACCCACTCTCCA
							R1-04239	20	59.45	65.00		GGACAGCTGTTGTGCGTGCG
isotig04247	p2	(AT)5	2	10	695	704	F1-04247	24	57.30	45.83	251	TCGAGATCGATGGCCAGCATTTTT
							R1-04247	24	58.14	54.17		CCCGTATAAACCCCACCCAACTGA
isotig04249	p2	(AT)5	2	10	196	205
isotig04813	p2	(AT)5	2	10	863	872
isotig05089	p2	(AT)5	2	10	801	810	F1-05089	21	58.97	66.67	261	CGTGGATAGGGCCTCCTTGCC
							R1-05089	21	57.04	52.38		TCTGCATGTAACGCAGCCCAA
isotig05278	p2	(AT)5	2	10	69	78
isotig05310	p2	(AT)5	2	10	16	25
isotig05380	p2	(AT)5	2	10	523	532	F1-05380	26	59.85	50.00	300	CGTGTATCAGTCAATTGCGTCTGGCA
							R1-05380	20	59.63	65.00		ACACGAGCCCAGTGTTCGCC
isotig05731	p2	(AT)5	2	10	331	340	F1-05731	22	58.96	63.64	251	CGCGAGAGGAAGGAGGAGAGGA
							R1-05731	26	57.25	46.15		ACCTCCTACTACCACTTGACAACGAA
isotig06007	p2	(AT)5	2	10	10	19
isotig06378	p2	(AT)5	2	10	642	651	F1-06378	25	57.01	48.00	136	TCCCTTTCACAATTGTCCAGTCGAG
							R1-06378	20	60.47	75.00		GGGGGTGGAGGGGAGGAGGA
isotig06489	p2	(AT)5	2	10	110	119	F1-06489	23	59.57	56.52	197	TCACGACCACCTCACGTCTGACA
							R1-06489	20	59.98	65.00		ACGCTGTCAAAGGGCCGACG
isotig06672	p2	(AT)5	2	10	376	385	F1-06672	22	57.36	54.54	184	TCGACTGTGTGCTGTCAGAGGA
							R1-06672	21	59.13	61.90		AGGTGCAAGAGCGTCGTGAGG
isotig06862	p2	(AT)5	2	10	313	322	F1-06862	20	60.54	75.00	207	CCCCTCCCTCCTCCCGGACT
							R1-06862	19	59.97	63.16		GTTTTGCCGCGCACGCAGT
isotig07297	p2	(AT)5	2	10	160	169	F1-07297	20	59.70	65.00	176	AAGCACAGCTCGGCCACTCG
							R1-07297	25	58.68	48.00		ACTGTCATCATCGCGTCGTATGTGT
isotig08098	p2	(AT)5	2	10	68	77
isotig08299	p2	(AT)5	2	10	400	409
isotig01596	p2	(AT)53	2	106	746	851
isotig01597	p2	(AT)53	2	106	633	738
isotig01955	p2	(AT)6	2	12	1	12
isotig02939	p2	(AT)6	2	12	37	48
isotig02982	p2	(AT)6	2	12	59	70
isotig03149	p2	(AT)6	2	12	32	43
isotig04075	p2	(AT)6	2	12	807	818	F1-04075	23	59.00	52.17	286	GGAGAAAAACAGCGTGCGCGTAA
							R1-04075	22	59.09	59.09		CGAAGGCTGCTGAACCCAAGGA
isotig04420	p2	(AT)6	2	12	428	439
isotig06064	p2	(AT)6	2	12	290	301	F1-06064	23	57.33	52.17	288	TTCTCCGTAATCTCGGGGCTTCA
							R1-06064	20	60.32	75.00		GGGCCCCGGACTCTCTCCAC
isotig06449	p2	(AT)6	2	12	412	423	F1-06449	20	59.97	70.00	231	CTGCGGGAGCCCTGTGTGTG
							R1-06449	25	57.22	48.00		CACTGTGTGGAAAATTACTCGTGCG
isotig04731	p2	(AT)7	2	14	393	406	F1-04731	23	57.15	52.17	243	ACTAGGTGTGGACTGCCTTGGAT
							R1-04731	20	59.68	65.00		ACGGCGCAGACCCCTGGATA
isotig02151	p2	(AT)8	2	16	2285	2300
isotig07000	p2	(AT)8	2	16	556	571
isotig07831	p2	(AT)8	2	16	304	319	F1-07831	20	59.33	65.00	266	TCGTGGGCGGATCTCTGGGT
							R1-07831	22	58.09	59.09		CGAAGAGCTCTGTCCTCGTGGT
isotig06685	p2	(AT)9	2	18	518	535	F1-06685	20	59.25	65.00	226	GCGGTGCATCGTGTTGTCGG
							R1-06685	24	57.45	45.83		GCAATAGGCAACAAGCAAGCAACA
isotig02317	p2	(CA)5	2	10	82	91
isotig03120	p2	(CA)5	2	10	283	292	F1-03120	24	60.06	54.17	226	CCACCGAGCGAGCTTCAAATTCGT
							R1-03120	20	58.34	65.00		AGTTGGAGAGGGGGTGTGCG
isotig03188	p2	(CA)5	2	10	435	444
isotig04607	p2	(CA)5	2	10	556	565	F1-04607	20	59.41	65.00	202	GGAGGTGCGGCGAATTGGGA
							R1-04607	20	59.83	65.00		TGAGAGGGTGGTGAGCCGCA
isotig00408	p2	(CA)6	2	12	572	583	F1-00408	23	59.18	56.52	235	ACATTGCCAAGCCATGGTAGGGG
							R1-00408	20	57.87	60.00		AATCCCGACACCTACGCGGT
isotig00409	p2	(CA)6	2	12	572	583	F1-00409	23	59.18	56.52	192	ACATTGCCAAGCCATGGTAGGGG
							R1-00409	20	59.78	65.00		AAGGGTCGCGACGACGAAGC
isotig00410	p2	(CA)6	2	12	465	476	F1-00410	22	59.86	63.64	265	GCTTCATCTGCAGCCATCCCCC
							R1-00410	20	57.97	65.00		TCGGACGGGATCACCTGACG
isotig00411	p2	(CA)6	2	12	465	476	F1-00411	22	59.86	63.64	239	GCTTCATCTGCAGCCATCCCCC
							R1-00411	20	59.97	65.00		TCCCGACACCTACGCGCTCA
isotig00750	p2	(CT)5	2	10	1598	1607	F1-00750	20	59.54	65.00	160	TCGACGGGGCAAGAGGGACA
							R1-00750	20	60.32	65.00		CGCCTTCCAGTCGCTGCGTT
isotig00751	p2	(CT)5	2	10	1596	1605	F1-00751	20	59.54	65.00	160	TCGACGGGGCAAGAGGGACA
							R1-00751	20	60.32	65.00		CGCCTTCCAGTCGCTGCGTT
isotig02076	p2	(CT)5	2	10	2809	2818	F1-02076	21	59.39	57.14	277	ACAACCGCCGATCGTTGAGCA
							R1-02076	20	58.97	65.00		TTCCGGTGAGAGGCGGAGGA
isotig02537	p2	(CT)5	2	10	1242	1251	F1-02537	23	59.26	52.17	257	TGCGGTTCCACACACATTCCACA
							R1-02537	21	59.99	66.67		GCGTGTGTCACCTGTCGTCCC
isotig02829	p2	(CT)5	2	10	67	76	F1-02829	23	59.21	56.52	192	TGGACGACACCATTCTCGTGCAG
							R1-02829	22	59.73	63.64		CCCCCACATCGTGACCCTACGA
isotig02899	p2	(CT)5	2	10	942	951	F1-02899	21	59.12	66.67	181	GCTGGACGGTGTCTCACCAGG
							R1-02899	21	59.98	66.67		GCTGGAGGGTCGTCGACTGGA
isotig03558	p2	(CT)5	2	10	909	918	F1-03558	20	60.05	65.00	251	CGGCGCTTGTTCCTCGTCGT
							R1-03558	20	58.49	65.00		AGCGGGAGAGTGGTGATGGC
isotig04252	p2	(CT)5	2	10	798	807	F1-04252	22	59.74	59.09	227	CCGGCACATTCGCACTGTCTGA
							R1-04252	23	59.28	56.52		CGTCCAGGAAATGGCAAAAGCGG
isotig05219	p2	(CT)5	2	10	274	283	F1-05219	20	59.26	65.00	234	ACCCGTTCTCTCTGCCCGGA
							R1-05219	21	59.05	61.90		CGACAAGGCAGTGGAGGCTGT
isotig05301	p2	(CT)5	2	10	71	80	F1-05301	24	57.96	54.17	193	TCCCTTTCTCTCCCTTTCTCCCCT
							R1-05301	20	59.76	70.00		GGTCGGCATGCCTGTGGAGG
isotig05902	p2	(CT)5	2	10	782	791
isotig07056	p2	(CT)5	2	10	408	417	F1-07056	20	60.04	70.00	199	GCCTCTCTGCAGTGGCTGGC
							F1-07056	20	59.51	70.00		GAGCGTGACAGGGACCGACG
isotig07159	p2	(CT)5	2	10	71	80
isotig07363	p2	(CT)5	2	10	575	584
isotig02180	p2	(CT)6	2	12	2568	2579	F1-02180	23	60.18	60.87	165	GCCAGGATGGCTAGCAGCCCTAT
							R1-02180	26	57.46	46.15		CACACATCGTACGAGTCAAGTGTTCA
isotig02359	p2	(CT)6	2	12	1810	1821	F1-02359	20	60.18	65.00	226	AGCTCGTCACTCCACCGCCA
							R1-02359	20	60.52	65.00		CGTGCACGGCGTCTGTGGTT
isotig02509	p2	(CT)6	2	12	99	110
isotig04462	p2	(CT)6	2	12	202	213
isotig05414	p2	(CT)6	2	12	433	444	F1-05414	22	58.69	59.09	216	CCAAGAGTTCAACGCCGTCTGC
							R1-05414	21	59.30	61.90		AGCTGGAGAGGCACGAGGTCA
isotig07685	p2	(CT)6	2	12	444	455	F1-07685	20	59.97	65.00	200	TGACTGTCAGCGCCGCCTTG
							R1-07685	22	57.39	54.54		AGCGAGCAGGACTTAGGGTTCA
isotig02565	p2	(CT)7	2	14	733	746	F1-02565	23	57.38	47.83	158	AGGTTTCATGCTGGCTGGTGTTT
							R1-02565	23	58.44	52.17		TGTGAACTGAGTGAAGCAGGGCA
isotig02368	p2	(CT)8	2	16	936	951	F1-02368	23	59.38	56.52	190	AGTGGCTTGGAAATCACCCCACG
							R1-02368	24	57.21	45.83		AGAGGTCCAAACCTTTTTGTCGCA
isotig08331	p2	(CT)8	2	16	409	424
isotig01386	p2	(CT)9	2	18	1032	1049	F1-01386	20	59.15	65.00	256	AGACCGCCAAGAGCAGCGAG
							R1-01386	25	59.08	52.00		CCGTTTTGCTTCCGTTTGTAGGTCG
isotig02250	p2	(CT)9	2	18	954	971	F1-02250	22	57.43	54.54	225	TGTTCACGTGCATTTCTCCCCC
							R1-02250	23	58.47	56.52		ACCCACCATAGTTCAGCTCGACG
isotig00443	p2	(GA)5	2	10	669	678
isotig00444	p2	(GA)5	2	10	669	678
isotig00690	p2	(GA)5	2	10	25	34	F1-00690	23	58.32	56.52	231	CGACGAGAGAGTTGCCGATCTGA
							R1-00690	22	58.76	59.09		CAGCCTCCAACTGCTTCACCCT
isotig01000	p2	(GA)5	2	10	180	189	F1-01000	27	59.24	48.15	201	CGAGAAATATGAGGAGTGTTTCGCGGT
							R1-01000	20	58.99	65.00		CCCTTGGCAGCCAGACGACA
isotig02067	p2	(GA)5	2	10	498	507	F1-02067	26	57.41	46.15	212	TCGAATGTCGAGAAAGAGCGAATGAG
							R1-02067	21	57.26	57.14		TGCCGAGGAAGAGGAGAGCAA
isotig02106	p2	(GA)5	2	10	48	57	F1-02106	24	59.60	58.33	187	GCTTCATTTCTCGGACGACTGGGG
							R1-02106	24	59.15	54.17		CGTCCGTCGACAATGATCTTCCGT
isotig02157	p2	(GA)5	2	10	149	158	F1-02157	20	59.24	65.00	203	GCACAGATGCGTGCGGAACC
							R1-02157	22	59.92	63.64		GGAGTCGGGGTTCAAGGGACGA
isotig02158	p2	(GA)5	2	10	1833	1842	F1-02158	20	59.23	65.00	188	TGCGACGCATCAGTCGGAGG
							R1-02158	20	59.17	65.00		GACTCGCTGCGGTCACGTCT
isotig02473	p2	(GA)5	2	10	836	845	F1-02473	26	60.01	53.85	193	CCCCCTCAGTGGTTTATTATGCCCCA
							R1-02473	26	59.69	50.00		ACGCAATTTGGCCACGATACTAGACG
isotig03913	p2	(GA)5	2	10	312	321	F1-03913	20	60.04	65.00	287	GCGACAATTGCGCCCCTCCT
							R1-03913	22	59.51	59.09		CGCTGTTTGTTCGAGTGCCACG
isotig04063	p2	(GA)5	2	10	394	403	F1-04063	22	60.05	63.64	177	TCGCCCTAGACCTCGTTCAGGC
							R1-04063	20	60.18	70.00		TCCCCACTGTACCGCCCACC
isotig04362	p2	(GA)5	2	10	802	811	F1-04362	20	60.32	70.00	221	GGGGGCAACAACTCCGAGCG
							R1-04362	22	57.56	59.09		TCACTCCCTCACTTTCACCCCC
isotig05076	p2	(GA)5	2	10	153	162	F1-05076	20	59.90	70.00	215	GCTCCACCACCCCACAGTGC
							R1-05076	20	58.96	65.00		TCCCTCGCCTCAGCCTGTCT
isotig05266	p2	(GA)5	2	10	261	270	F1-05266	20	59.62	70.00	179	GGCAAGGAGTGCCCCCAGTG
							R1-05266	27	59.86	48.15		ACAGTCCTCAAAAGCTCAAAACAGCCC
isotig05672	p2	(GA)5	2	10	635	644	F1-05672	23	59.31	56.52	244	GCCAAGAGTGGTTGCAAGAGGGT
							R1-05672	26	58.05	42.31		ACATCACATGTTTTCCGATTGTGCCA
isotig06155	p2	(GA)5	2	10	404	413	F1-06155	20	59.98	60.00	290	TTCGACCGCGCTCTGCGTTT
							R1-06155	26	57.22	46.15		AGTCATTCTGGAGTGAAAGAGGTGGA
isotig06521	p2	(GA)5	2	10	638	647
isotig06725	p2	(GA)5	2	10	444	453	F1-06725	20	60.25	70.00	190	TCCTCGACCCCTTGGCCGAC
							R1-06725	22	58.86	59.09		TGCCCGGGCTAAGGTATCTGGA
isotig07852	p2	(GA)5	2	10	514	523
isotig00231	p2	(GA)6	2	12	3149	3160
isotig00232	p2	(GA)6	2	12	2506	2517
isotig00233	p2	(GA)6	2	12	1491	1502
isotig00580	p2	(GA)6	2	12	426	437	F1-00580	20	60.32	70.00	245	GGGCCGAGGGTGCCTCATCT
							R1-00580	20	59.28	70.00		GCTCTGGCCTCATCCTCGGC
isotig00581	p2	(GA)6	2	12	426	437	F1-00581	20	60.32	70.00	245	GGGCCGAGGGTGCCTCATCT
							R1-00581	20	59.28	70.00		GCTCTGGCCTCATCCTCGGC
isotig00586	p2	(GA)6	2	12	577	588	F1-00586	23	57.22	52.17	203	TGTCACTCTGAACCTCTCGCTCA
							R1-00586	25	57.95	48.00		TGCTCTGTCTTCAGTCCAAATCCGA
isotig03449	p2	(GA)6	2	12	743	754	F1-03449	21	58.29	57.14	247	ACAGGTGTCACCCAAGTGCGA
							R1-03449	21	58.17	57.14		TCCGACCATTCCAGTGACGCA
isotig06194	p2	(GA)6	2	12	201	212	F1-06194	23	57.03	52.17	248	AGTGGTTACTGGTGGTCACTGGA
							R1-06194	20	59.84	70.00		GTCGCGTCACTAGCCCCACG
isotig07032	p2	(GA)7	2	14	12	25
isotig01971	p2	(GA)8	2	16	225	240	F1-01971	24	57.70	50.00	252	TCCGTTTGGTTGCCATGAAGATCC
							R1-01971	21	60.37	66.67		CCCCAGCAGACGAATGCCACG
isotig06881	p2	(GA)8	2	16	28	43
isotig03033	p2	(GC)5	2	10	586	595	F1-03033	21	58.42	57.14	159	TGTGTTTGGTGTGTGCGGACG
							R1-03033	21	58.92	61.90		TGGCTTTCTGATCTCCGGGCG
isotig00979	p2	(GT)5	2	10	552	561	F1-00979	23	58.39	52.17	226	CGATGATGAACGCCAGAATGCGT
							R1-00979	23	58.03	52.17		ACGCACTCGAATAAAAGCGGACC
isotig02141	p2	(GT)5	2	10	2298	2307	F1-02141	24	57.47	50.00	204	CCGAGCAAATGGGAGTGAATGTGA
							R1-02141	21	57.31	52.38		AAACAGGCAATGCGGTACGGT
isotig02159	p2	(GT)5	2	10	2367	2376	F1-02159	20	57.42	60.00	117	TGGGGGTAATGGATGGCGGT
							R1-02159	23	59.58	56.52		TCCGGATAACGACAACCGAACGC
isotig02627	p2	(GT)5	2	10	1602	1611	F1-02627	27	58.17	44.44	212	TGGGCGATTTTCAGATAGTCAGACACA
							R1-02627	21	57.72	57.14		TGCCGAAGCATGCTCGTATCG
isotig04712	p2	(GT)5	2	10	568	577	F1-04712	20	59.63	65.00	201	GGTGCGCACAGCTCCAGGAA
							R1-04712	21	59.79	61.90		TGCCTTCGTTCGTCTCGTCGC
isotig07987	p2	(GT)5	2	10	460	469
isotig00919	p2	(GT)6	2	12	816	827	F1-00919	20	59.71	65.00	147	TGGCGAACTCACGAGCCACG
							R1-00919	22	59.17	54.54		ACGGCAAGGCAATGTACGACGA
isotig02092	p2	(GT)6	2	12	2721	2732	F1-02092	22	59.29	54.54	2204	TGGCACATGCACACTTCGGTCA
							R1-02092	22	58.71	59.09		CCTGTTCATGGCGATACCCCGT
isotig02950	p2	(GT)6	2	12	123	134	F1-02950	27	57.79	48.15	226	GTCTCTCCAGGTGAAATAGGATTCCGT
							R1-02950	23	59.62	60.87		CCCAGCACCTGGTTCTTTGTCCC
isotig00050	p2	(TA)5	2	10	1177	1186
isotig00051	p2	(TA)5	2	10	1177	1186
isotig00052	p2	(TA)5	2	10	1177	1186
isotig00053	p2	(TA)5	2	10	1177	1186
isotig00054	p2	(TA)5	2	10	1177	1186
isotig00055	p2	(TA)5	2	10	1177	1186
isotig00231	p2	(TA)5	2	10	4042	4051
isotig00232	p2	(TA)5	2	10	3399	3408
isotig00233	p2	(TA)5	2	10	2384	2393
isotig00234	p2	(TA)5	2	10	672	681
isotig00912	p2	(TA)5	2	10	5	14	F1-00912	27	57.89	44.44	239	TGTTTTCTAATGTACGCCCTGAGACCT
							R1-00912	20	59.69	70.00		GAGCCCACCCTGGAAGCAGC
isotig00913	p2	(TA)5	2	10	5	14	F1-00913	27	57.89	44.44	239	TGTTTTCTAATGTACGCCCTGAGACCT
							R1-00913	20	59.69	70.00		GAGCCCACCCTGGAAGCAGC
isotig01678	p2	(TA)5	2	10	16	25
isotig01679	p2	(TA)5	2	10	16	25
isotig02205	p2	(TA)5	2	10	571	580
isotig02257	p2	(TA)5	2	10	2106	2115	F1-02257	24	58.14	50.00	220	TGGAGAAGTTGATGGCCGATTGGA
							R1-02257	22	59.24	54.54		CCGAATGCAAAGCCCAATGCGT
isotig02831	p2	(TA)5	2	10	194	203	F1-02831	20	59.07	65.00	212	ACGAAGGCTTGTCGAGGCCC
							R1-02831	20	57.36	55.00		AGCCTGCTTGCCCGAAACAA
isotig02960	p2	(TA)5	2	10	1019	1028	F1-02960	20	57.79	55.00	224	ACTTGCGTTGCGTGAACCGA
							R1-02960	20	59.97	70.00		GGCTGCTGACGGAGGGGGTA
isotig03086	p2	(TA)5	2	10	599	608	F1-03086	22	59.53	59.09	229	TGTCTCGGTGGTCCTTCACGGT
							R1-03086	21	59.32	61.90		GCCGAGGACACAGCAACTGGT
isotig03119	p2	(TA)5	2	10	1504	1513
isotig03261	p2	(TA)5	2	10	830	839
isotig05184	p2	(TA)5	2	10	804	813	F1-05184	25	59.05	52.00	181	CCCTCATTTCTCAAACTCTCGCCGT
							R1-05184	27	58.13	48.15		TGAGCCACAGCGAGATATCTTCTTCTC
isotig05374	p2	(TA)5	2	10	73	82
isotig05844	p2	(TA)5	2	10	124	133	F1-05844	26	57.29	46.15	201	CTCACTCTCACTGAAAACCAAGCAGT
							R1-05844	20	59.97	65.00		AGAGCGCTCACCAACACCGC
isotig06626	p2	(TA)5	2	10	258	267	F1-06626	20	59.49	65.00	195	GCGCCACTCGAGATGCCACT
							R1-06626	22	57.43	50.00		TGCTGCCTCCGCTGAAAAATCA
isotig07833	p2	(TA)5	2	10	401	410
isotig07852	p2	(TA)5	2	10	295	304
isotig04644	p2	(TA)6	2	12	516	527	F1-04644	27	57.83	40.74	257	ACGTGCAGCCATATTTACAACGAATGA
							R1-04644	27	57.77	40.74		TCCAGCATTTTGGCGTTTATCGTAAGT
isotig06036	p2	(TA)7	2	14	54	67
isotig08122	p2	(TA)7	2	14	408	421
isotig02209	p2	(TA)8	2	16	2334	2349	F1-02209	21	57.09	52.38	208	TCGGCCACAATCGTTCGACAA
							R1-02209	23	58.75	52.17		ACTTGGCTGTGTGTTGCTAGGCT
isotig02974	p2	(TA)8	2	16	265	280	F1-02974	26	57.02	46.15	277	ACTCACACAGAATCCTCAGACTCACT
							R1-02974	26	57.01	42.31		TGACGAAAATAGTGCACCAATGCAAG
isotig00912	p2	(TC)5	2	10	1781	1790
isotig00913	p2	(TC)5	2	10	1781	1790
isotig00930	p2	(TC)5	2	10	2988	2997	F1-00930	21	57.27	57.14	246	TGACGTAGCTCAAGCCTCCCA
							R1-00930	20	59.68	70.00		CCCCCACGATCCTCTGGGCT
isotig00931	p2	(TC)5	2	10	1609	1618	F1-00931	21	57.27	57.14	246	TGACGTAGCTCAAGCCTCCCA
							R1-00931	20	59.68	70.00		CCCCCACGATCCTCTGGGCT
isotig00982	p2	(TC)5	2	10	1403	1412	F1-00982	21	58.14	57.14	197	AGGGCCTCCAAATCACGCTCA
							R1-00982	20	59.65	65.00		GAAACGGCGCGATGGAAGCG
isotig00983	p2	(TC)5	2	10	1403	1412	F1-00983	20	59.57	65.00	189	GCGCTGGCAATTTCGGCTCC
							R1-00983	20	59.69	65.00		AGCTCGCCGAGACTTCCCGA
isotig01184	p2	(TC)5	2	10	1585	1594
isotig01218	p2	(TC)5	2	10	868	877	F1-01218	22	58.93	54.54	205	TCGCGTTCGTTGTGAGATCGGT
							R1-01218	27	57.24	44.44		CGTCTTCGCGAAAAATATCCTGAATCG
isotig02036	p2	(TC)5	2	10	1447	1456	F1-02036	23	59.62	56.52	222	ACACCCTGAAGATCTGCCCACGA
							R1-02036	21	59.71	66.67		GGCGAGGGTAAGGACGAGGGT
isotig02098	p2	(TC)5	2	10	2311	2320	F1-02098	23	58.72	52.17	216	ACGCAAATCGTCGCGTTATCGTC
							R1-02098	21	59.41	66.67		CGACGGATCCGAGAAGGACGC
isotig02147	p2	(TC)5	2	10	585	594	F1-02147	21	58.89	57.14	211	ACCACGTTGTGGCCCATTCCA
							R1-02147	21	59.38	61.90		GCTCAAGGGAAAGGTCGCGGT
isotig02187	p2	(TC)5	2	10	2236	2245	F1-02187	21	59.66	61.90	184	TGCCGGACAAACTCACGACCG
							R1-02187	21	59.20	61.90		ACCGACATTCCGACGCTGGAC
isotig02516	p2	(TC)5	2	10	1916	1925	F1-02516	20	60.25	65.00	224	TTGGCGGCTGGACTCGTTGC
							R1-02516	20	59.68	65.00		AATCCCGCCGAGGAGAGGCA
isotig02591	p2	(TC)5	2	10	1617	1626	F1-02591	22	59.79	63.64	207	AGCCTCTGCGATCTCCTTCCCC
							R1-02591	24	57.33	45.83		TTCCACGCAACCAAATCTGGTCAT
isotig02948	p2	(TC)5	2	10	1156	1165	F1-02948	21	57.42	52.38	240	TCGCCATTTTCGCTTCGGACA
							R1-02948	22	59.24	59.09		TGCGCCTCGAAGAGGAGAAACG
isotig03043	p2	(TC)5	2	10	156	165	F1-03043	21	57.74	57.14	194	TCGATTTCCCCGTCGTCGTCT
							R1-03043	20	59.70	60.00		ACAGATTTGCGGTCGCGCCT
isotig03250	p2	(TC)5	2	10	1119	1128	F1-03250	22	59.01	59.09	247	TCCTTCGACCCTCTGCTGACCA
							R1-03250	21	59.64	61.90		TGGGAGCGTGACAGGGATCGT
isotig03652	p2	(TC)5	2	10	1146	1155	F1-03652	20	58.87	65.00	199	TGGAGGCCAGGAGTCAGCCT
							R1-03652	20	58.01	65.00		TCAGGGCCAGAATGTGGGGG
isotig03707	p2	(TC)5	2	10	1178	1187	F1-03707	20	59.40	65.00	260	TCCTCCCCTCGCATCTCGCA
							R1-03707	20	60.11	70.00		CGTCGAAGTCGCGGTGGTCC
isotig03787	p2	(TC)5	2	10	406	415	F1-03787	20	59.97	65.00	200	ACGAGGCGTCAGTGCTTGCC
							R1-03787	23	58.34	52.17		ACCTGAAGACGACGAATGCCAGT
isotig03933	p2	(TC)5	2	10	1066	1075	F1-03933	20	60.47	70.00	214	TCCTGGCTGCCCCTGGTCAC
							R1-03933	22	57.70	50.00		AGAAGCTGACGTGCATGCCAAA
isotig04238	p2	(TC)5	2	10	768	777	F1-04238	20	59.26	65.00	269	TCCGCCCTCGTGTCTCCAGT
							R1-04238	20	59.08	65.00		CAGCCGAGTGCACCGTACCA
isotig05483	p2	(TC)5	2	10	156	165	F1-05483	20	59.27	65.00	188	CAGCCTGAGCAGCACCACCA
							R1-05483	22	59.22	63.64		AGAGAGGAGCCGAGAGACGTGG
isotig05774	p2	(TC)5	2	10	37	46	F1-05774	23	59.93	56.52	274	ACGAACGTCGCTCCCCTAAACCT
							R1-05774	21	59.98	61.90		GCCAAAGAAGCGGCTGAGGCT
isotig06104	p2	(TC)5	2	10	135	144	F1-06104	21	59.10	66.67	226	CCTTCGACCTCTCCCGGTCCT
							R1-06104	22	57.50	54.54		GTGTCCAAGCACGACGACAAGA
isotig06166	p2	(TC)5	2	10	344	353
isotig06636	p2	(TC)5	2	10	520	529	F1-06636	20	60.04	70.00	201	CCTCCAGCGGTTCTGCAGCC
							R1-06636	20	59.82	65.00		TGCACTAGCTGGTGGGGCCT
isotig06646	p2	(TC)5	2	10	388	397	F1-06646	20	59.21	65.00	212	CTAGCGCATGGGCTCGGTGT
							R1-06646	21	58.99	61.90		CCGCAGTCAGCTAATCGGCCT
isotig06903	p2	(TC)5	2	10	63	72
isotig07135	p2	(TC)5	2	10	212	221	F1-07135	20	59.82	70.00	217	CCCTGTCCCTCGGTGGTGGT
							R1-07135	20	59.71	65.00		GCACTGCAGCAGGCACAAGC
isotig07350	p2	(TC)5	2	10	343	352	F1-07350	24	57.65	45.83	226	ACAGCCATCACAACGAATTCAGCA
							R1-07350	25	58.33	48.00		TGGTTAATGCGACGTTCCCATTGTG
isotig07893	p2	(TC)5	2	10	488	497
isotig00481	p2	(TC)6	2	12	2871	2882	F1-00481	21	59.09	61.90	194	GCTCGCTGCAACTCATCAGCG
							R1-00481	25	58.31	48.00		TCGTGGGTGTGATATCGAGCTTTGT
isotig00483	p2	(TC)6	2	12	1136	1147	F1-00483	21	59.09	61.90	194	GCTCGCTGCAACTCATCAGCG
							R1-00483	25	58.31	48.00		TCGTGGGTGTGATATCGAGCTTTGT
isotig01194	p2	(TC)6	2	12	1186	1197	F1-01194	20	60.47	70.00	180	TGGAGCGACCTTGGGGGTGG
							R1-01194	21	58.58	61.90		TGGAGGCTGTTGGGAGGAGGA
isotig01195	p2	(TC)6	2	12	1186	1197	F1-01195	20	60.47	70.00	180	TGGAGCGACCTTGGGGGTGG
							R1-01195	21	58.58	61.90		TGGAGGCTGTTGGGAGGAGGA
isotig06028	p2	(TC)6	2	12	90	101
isotig07092	p2	(TC)6	2	12	402	413	F1-07092	20	59.84	60.00	204	TCTGTGCGCCGTGCTGTGTT
							R1-07092	20	59.77	65.00		CACGAAGCGCCCTAGCAGCA
isotig00830	p2	(TC)7	2	14	4137	4150
isotig00831	p2	(TC)7	2	14	4137	4150	F1-00831	26	59.74	50.00	199	CGCCTCCCGATTGTTTTTGTTACCCT
							R1-00831	21	59.05	61.90		CCTCCCACCAGTCGCGAAACA
isotig01237	p2	(TC)7	2	14	1324	1337
isotig02212	p2	(TC)7	2	14	2368	2381	F1-02212	20	60.11	70.00	202	CGTCGCGTGTCCCCTCGAAC
							R1-02212	23	58.65	52.17		TCTCTAAATGACGGGCGTTGGCA
isotig01394	p2	(TC)8	2	16	229	244
isotig08391	p2	(TC)8	2	16	275	290
isotig02469	p2	(TC)9	2	18	2026	2043	F1-02469	23	57.68	52.17	143	ACCGAAGTCTCGGATAGTTGCGA
							R1-02469	27	57.92	48.15		GCAGATTGAATACCGACGGACATATCG
isotig00541	p2	(TG)5	2	10	3410	3419	F1-00541	20	60.11	65.00	250	ACACCCGACGTCACCACGGA
							R1-00541	20	59.63	60.00		AGTGCTCAGAGCGCGTGCAA
isotig00542	p2	(TG)5	2	10	1242	1251	F1-00542	20	60.11	65.00	250	ACACCCGACGTCACCACGGA
							R1-00542	20	59.63	60.00		AGTGCTCAGAGCGCGTGCAA
isotig00565	p2	(TG)5	2	10	140	149	F1-00565	20	59.50	65.00	202	GAGCGTAGGGAGTTGCGCGT
							R1-00565	20	60.45	60.00		TGCAAAGTGCGTGGTCGCGT
isotig00566	p2	(TG)5	2	10	140	149	F1-00566	20	59.50	65.00	202	GAGCGTAGGGAGTTGCGCGT
							R1-00566	20	60.45	60.00		TGCAAAGTGCGTGGTCGCGT
isotig01178	p2	(TG)5	2	10	1704	1713
isotig01179	p2	(TG)5	2	10	1411	1420
isotig01986	p2	(TG)5	2	10	1614	1623	F1-01986	20	59.98	65.00	204	GGGTCGTGCACGCTCGTTGA
							R1-01986	21	59.79	66.67		CGGGGTCTCCACATGACACGC
isotig02694	p2	(TG)5	2	10	237	246	F1-02694	20	57.73	60.00	205	TGGGACAGCGGAACGAGACA
							R1-02694	20	60.65	65.00		GGCACCAATGTCGCTCGCGT
isotig02946	p2	(TG)5	2	10	808	817	F1-02946	20	59.77	70.00	171	CGGACCCCTTACAGCACCGC
							R1-02946	22	59.48	59.09		TCCCAGGCGTTTTCTCCGATGC
isotig03028	p2	(TG)5	2	10	1625	1634
isotig07775	p2	(TG)5	2	10	75	84	F1-07775	20	59.62	65.00	140	AGCAGGTGAAGCCCTTGCCG
							R1-07775	20	58.73	65.00		ACACACGGGTGAGCGTCCTC
isotig01559	p2	(TG)6	2	12	102	113	F1-01559	20	59.43	60.00	221	TTGCGTCTGCGGCGGTACAT
							R1-01559	20	57.90	60.00		GCAGCGGTGTGGATCTGCAA
isotig00995	p2	(TG)7	2	14	278	291	F1-00995	27	57.38	40.74	183	TCTGCAAAATTCGCTGGATAAAAACCG
							R1-00995	20	59.06	65.00		TAGCCAACCGCTTGCTCCCC
isotig06449	p2	(TG)7	2	14	273	286
isotig00864	p2	(TG)9	2	18	2222	2239	F1-00864	27	58.16	44.44	237	GGGAACAGCATAAACGATGATAACGCA
							R1-00864	25	57.78	52.00		CAAGAGGACAGCAGACCTGGTGATA
isotig00865	p2	(TG)9	2	18	2222	2239	F1-00865	27	58.16	44.44	237	GGGAACAGCATAAACGATGATAACGCA
							R1-00865	25	57.78	52.00		CAAGAGGACAGCAGACCTGGTGATA
isotig00854	p3	(AAC)5	3	15	1	15
isotig00855	p3	(AAC)5	3	15	1	15
isotig01984	p3	(AAC)5	3	15	2891	2905	F1-01984	23	58.68	56.52	235	ACCCTCATCCTCATCGTCCTCGT
							R1-01984	20	60.53	70.00		GCCCTGGTGCTGGAGACGGA
isotig07335	p3	(AAC)5	3	15	185	199	F1-07335	20	60.04	70.00 GAGAGCAACGCCACGTCCCC	215	GAGAGCAACGCCACGTCCCC
							F1-07335	20	59.84	70.00		CGGACTCTCTTCGCGTGGGC
isotig06399	p3	(AAG)5	3	15	14	28
isotig02088	p3	(AAG)6	3	18	974	991	F1-02088	20	59.90	70.00	223	CTGGGTGCTGACCCTCGGGA
							R1-02088	21	59.79	66.67		GGCGTCTTCGTTGAGGAGGGC
isotig02433	p3	(AAG)6	3	18	1463	1480	F1-02433	20	59.97	70.00	147	TCTCGCTCCGAGGTTGGGGG
							R1-02433	27	59.20	48.15		GCTCATTGGTGCTGGTGTTAAATGTCG
isotig00246	p3	(AAT)5	3	15	622	636	F1-00246	20	59.22	70	210	GCACGAGATCCCCCACGTCC
							R1-00246	23	59.93	56.52		ACGTGCTTCAGGACGATGACCCT
isotig01414	p3	(AAT)5	3	15	634	648	F1-01414	21	59.56	61.90	148	ACGGGAGCCTCCAGCTTTCCT
							R1-01414	21	59.43	61.90		CGCGCGAAGTTCAATCGACGG
isotig02977	p3	(AAT)5	3	15	76	90	F1-02977	27	57.10	44.44	195	GGCCCTCTTACATTCATCACTAGCAAA
							R1-02977	25	57.15	44.00		TTGGCCACATGAATTTGAGCGAATG
isotig03139	p3	(AAT)5	3	15	1004	1018	F1-03139	27	59.97	48.15	126	TGGGGAAACGTTGAACATCGAAGAAGC
							R1-03139	26	59.53	50.00		TGCGGCAATTGTGTACACTTCTCTCC
isotig07466	p3	(AAT)5	3	15	508	522
isotig08302	p3	(ACA)5	3	15	213	227	F1-08302	21	59.18	66.67	194	GGCCAAGGACTGTACTCCCGC
							R1-08302	23	58.65	52.17		TGCTTCTGATTCGCAGGAACGGA
isotig06171	p3	(ACA)7	3	21	329	349	F1-06171	20	59.49	65.00	210	CGGTGCTGGTGCCGATGCTA
							R1-06171	25	57.02	44.00		TGCTGAATCTTCGTCACTTTCTGCT
isotig00295	p3	(ACC)5	3	15	710	724	F1-00295	20	59.62	60	236	ATCCGCAACTGGCAGCAGCA
							R1-00295	20	59.77	65		GCAGCGCCACCGAGGAATGA
isotig01026	p3	(ACC)5	3	15	1774	1788	F1-01026	20	59.36	65.00	200	GCCACACTGTGACGCCGGTA
							R1-01026	20	60.25	65.00		ACGGCTCGTGTCCAGAGCGA
isotig01027	p3	(ACC)5	3	15	1072	1086	F1-01027	20	59.36	65.00	200	GCCACACTGTGACGCCGGTA
							R1-01027	20	60.25	65.00		ACGGCTCGTGTCCAGAGCGA
isotig06863	p3	(ACC)5	3	15	193	207	F1-06863	22	59.87	59.09	197	CGGCGATGGACTTTTAGCGCCT
							R1-06863	20	57.13	60.00		AGCTACCACGGAGCACAGGA
isotig01084	p3	(ACC)6	3	18	971	988	F1-01084	20	59.61	70.00	268	TGGGCTCCTCACCCTCGTCC
							R1-01084	23	58.07	52.17		GCCAGAACGTGAGACAAGCAACA
isotig02506	p3	(ACG)6	3	18	19	36
isotig00229	p3	(AGA)6	3	18	1539	1556	F1-00229	25	59.42	56	240	CCTCTGGGATAAGGGTCACAACCCA
							R1-00229	24	57.13	50		GCTCGATCGTGCTGTTCTACTTGA
isotig00964	p3	(AGC)6	3	18	541	558	F1-00964	20	60.58	70.00	235	CCGACACCAACGGCACCGAC
							R1-00964	20	59.77	70.00		CCGCCTGTCGTTGCCTCCTC
isotig00965	p3	(AGC)6	3	18	541	558	F1-00965	20	60.58	70.00	235	CCGACACCAACGGCACCGAC
							R1-00965	20	59.77	70.00		CCGCCTGTCGTTGCCTCCTC
isotig01613	p3	(AGT)8	3	24	99	122	F1-01613	25	57.21	48.00	192	TGTTCACGGTGGCTGTAGTAGTAGT
							R1-01613	20	60.46	70.00		AGATCCCGATCCCGCAGCCC
isotig03923	p3	(ATA)8	3	24	59	82
isotig00001	p3	(ATC)7	3	21	2435	2455	F1-00001	20	59.58	65	271	AGTCCGCCGCCAGGGTGATA
							R1-00001	21	58.22	52.38		ACAATGACTGTGCGTTGCGCT
isotig00002	p3	(ATC)7	3	21	2435	2455	F1-00002	20	59.68	65	271	AGTCCGCCGCCAGGGTGATA
							R1-00002	21	58.22	52.4		ACAATGACTGTGCGTTGCGCT
isotig00003	p3	(ATC)7	3	21	2573	2593	F1-00003	20	59.7	65	271	AGTCCGCCGCCAGGGTGATA
							R1-00003	21	58.22	52.4		ACAATGACTGTGCGTTGCGCT
isotig00004	p3	(ATC)7	3	21	2573	2593	F1-00004	20	59.7	65	271	AGTCCGCCGCCAGGGTGATA
							R1-00004	21	58.2	52.4		ACAATGACTGTGCGTTGCGCT
isotig00005	p3	(ATC)7	3	21	2371	2391	F1-00005	20	59.7	65	271	AGTCCGCCGCCAGGGTGATA
							R1-00005	21	58.2	52.4		ACAATGACTGTGCGTTGCGCT
isotig00006	p3	(ATC)7	3	21	2371	2391	F1-00006	20	59.68	65.00	271	AGTCCGCCGCCAGGGTGATA
							R1-00006	21	58.22	52.38		ACAATGACTGTGCGTTGCGCT
isotig00007	p3	(ATC)7	3	21	2360	2380	F1-00007	20	59.68	65	271	AGTCCGCCGCCAGGGTGATA
							R1-00007	21	58.22	52.38		ACAATGACTGTGCGTTGCGCT
isotig00008	p3	(ATC)7	3	21	2360	2380	F1-00008	20	59.7	65	271	AGTCCGCCGCCAGGGTGATA
							R1-00008	21	58.2	52.4		ACAATGACTGTGCGTTGCGCT
isotig00009	p3	(ATC)7	3	21	2509	2529	F1-00009	20	59.7	65	271	AGTCCGCCGCCAGGGTGATA
							R1-00009	21	58.2	52.4		ACAATGACTGTGCGTTGCGCT
isotig00010	p3	(ATC)7	3	21	2509	2529	F1-00010	20	59.7	65	271	AGTCCGCCGCCAGGGTGATA
							R1-00010	21	58.2	52.4		ACAATGACTGTGCGTTGCGCT
isotig00011	p3	(ATC)7	3	21	3947	3967	F1-00011	20	59.7	65	271	AGTCCGCCGCCAGGGTGATA
							R1-00011	21	58.22	52.4		ACAATGACTGTGCGTTGCGCT
isotig00012	p3	(ATC)7	3	21	2498	2518	F1-00012	20	59.68	65	271	AGTCCGCCGCCAGGGTGATA
							R1-00012	21	58.22	52.4		ACAATGACTGTGCGTTGCGCT
isotig00013	p3	(ATC)7	3	21	3947	3967	F1-00013	20	59.68	65	271	AGTCCGCCGCCAGGGTGATA
							R1-00013	21	58.22	52.4		ACAATGACTGTGCGTTGCGCT
isotig00014	p3	(ATC)7	3	21	2498	2518	F1-00014	20	59.68	65	271	AGTCCGCCGCCAGGGTGATA
							R1-00014	21	58.22	52.4		ACAATGACTGTGCGTTGCGCT
isotig00015	p3	(ATC)7	3	21	2296	2316	F1-00015	20	59.68	65	271	AGTCCGCCGCCAGGGTGATA
							R1-00015	21	58.22	58.4		ACAATGACTGTGCGTTGCGCT
isotig00016	p3	(ATC)7	3	21	2296	2316	F1-00016	20	59.68	65	271	AGTCCGCCGCCAGGGTGATA
							R1-00016	21	58.22	52.4		ACAATGACTGTGCGTTGCGCT
isotig00017	p3	(ATC)7	3	21	2434	2454	F1-00017	20	59.68	65	271	AGTCCGCCGCCAGGGTGATA
							R1-00017	21	58.22	52.4		ACAATGACTGTGCGTTGCGCT
isotig00018	p3	(ATC)7	3	21	2434	2454	F1-00018	20	59.68	65	271	AGTCCGCCGCCAGGGTGATA
							R1-00018	22	58.22	52.4		ACAATGACTGTGCGTTGCGCT
isotig00021	p3	(ATC)7	3	21	1614	1634	F1-00021	20	59.68	65	271	AGTCCGCCGCCAGGGTGATA
							R1-00021	21	58.22	52.38		ACAATGACTGTGCGTTGCGCT
isotig00022	p3	(ATC)7	3	21	1614	1634	F1-00022	20	59.68	65	271	AGTCCGCCGCCAGGGTGATA
							R1-00022	21	58.22	52.38		ACAATGACTGTGCGTTGCGCT
isotig00023	p3	(ATC)7	3	21	1752	1772	F1-00023	20	59.68	65	271	AGTCCGCCGCCAGGGTGATA
							R1-00023	21	58.22	52.38		ACAATGACTGTGCGTTGCGCT
isotig00024	p3	(ATC)7	3	21	1752	1772	F1-00024	20	59.68	65	271	AGTCCGCCGCCAGGGTGATA
							R1-00024	21	58.22	52.38		ACAATGACTGTGCGTTGCGCT
isotig06498	p3	(ATC)7	3	21	144	164	F1-06498	27	57.67	44.44	200	TGTGGGAATGAGAAATGTAGAGGTCGT
							R1-06498	20	59.69	65.00		ACCGCCAGGAGGACGACGAT
isotig05531	p3	(ATG)5	3	15	407	421	F1-05531	20	59.61	65.00	233	TCCAGCATTGGTGGGGCTGC
							R1-05531	23	57.84	52.17		TGGCGGGTATGAAGAACACGAGA
isotig07071	p3	(ATG)5	3	15	472	486	F1-07071	23	58.98	56.52	207	TCCGCCATAGCCTCCATAGTGGT
							R1-07071	20	59.53	65.00		TCGCCCCAACCAGATCCCCA
isotig01480	p3	(ATG)7	3	21	518	538	F1-01480	20	59.42	70.00	182	GAGACAGGCAGACCACCGGC
							R1-01480	21	59.72	61.90		ACGGCGACCTTTGCTCAGACG
isotig00758	p3	(ATT)11	3	33	1	33
isotig00759	p3	(ATT)11	3	33	1	33
isotig00535	p3	(ATT)5	3	15	2440	2454	F1-00535	21	59.45	61.90	221	ACCACTGCCCAACGATACCGC
							R1-00535	20	59.62	65.00		GGTCCGCGCCAAGGGAAGTT
isotig00536	p3	(ATT)5	3	15	2440	2454	F1-00536	21	59.45	61.90	221	ACCACTGCCCAACGATACCGC
							R1-00536	20	59.62	65.00		GGTCCGCGCCAAGGGAAGTT
isotig02030	p3	(ATT)5	3	15	3040	3054	F1-02030	20	59.90	65.00	266	CCGCAACGCCCTGGACAACT
							R1-02030	20	59.49	70.00		CGGTGACATCCCCCTCACGC
isotig05386	p3	(ATT)5	3	15	689	703	F1-05386	20	59.28	65.00	300	GCCCTCGCTGGCTCGCTTAT
							R1-05386	21	59.10	66.67		GGGCACATCCCCTCCCACTTG
isotig06490	p3	(ATT)5	3	15	460	474	F1-06490	24	58.82	50.00	103	ACGAAAGGAGTAAAACCACCGCCA
							R1-06490	26	57.90	42.31		AGACGGCGATTAAATTGACTTTGCCA
isotig03388	p3	(ATT)6	3	18	52	69
isotig01528	p3	(CAA)5	3	15	442	456	F1-01528	24	57.14	45.83	202	TTCTGTAGCTGCAAAACTCTGCGA
							R1-01528	20	59.69	65.00		TGGGCTGCGGACTTCATGGC
isotig02563	p3	(CAA)5	3	15	1406	1420	F1-02563	20	59.83	60.00	207	AGGCACAGCAGCAGCAGCAA
							R1-02563	22	59.03	54.54		ACGAGACATTTGGTGCCACCGT
isotig06170	p3	(CAA)5	3	15	100	114	F1-06170	23	58.21	52.17	289	TCGATAGCGGGTCAATTGGCTGA
							R1-06170	23	57.61	47.83		TGTTCTGCACAACCAAACGTCCA
isotig05499	p3	(CAC)6	3	18	724	741	F1-05499	20	59.42	70.00	202	CCAAGCCTCCGCACCCTGAG
							R1-05499	20	59.40	70.00		GGGAGCCCCGCAGAGGAGTA
isotig06796	p3	(CAC)6	3	18	533	550	F1-06796	21	58.23	61.90	224	TCCAGCCCAGCTCCTTTCTCG
							R1-06796	20	59.83	65.00		GGCCAAGGGGCCGACAACAA
isotig03364	p3	(CAG)5	3	15	193	207	F1-03364	20	57.36	60.00	202	ACTCGCTGAGAGAGACGCGA
							R1-03364	20	60.03	70.00		CCCACCACCACCACCCAGGA
isotig03388	p3	(CAG)5	3	15	1436	1450
isotig05607	p3	(CAG)5	3	15	678	692	F1-05607	21	60.11	61.90	205	TGCTGAGTCCACCCAGCGTGA
							R1-05607	20	59.60	70.00		CCTGGGGCTGACTAGGGCCA
isotig05607	p3	(CAG)6	3	18	450	467
isotig05822	p3	(CAG)7	3	21	759	779	F1-05822	20	59.77	65.00	168	ATTCCTGGCTCACGCGCTGG
							R1-05822	22	59.74	63.64		GCTCTGTTGAGTCTGTGGCGGG
isotig07275	p3	(CAT)5	3	15	594	608
isotig06224	p3	(CAT)6	3	18	31	48	F1-06224	26	59.84	57.69	219	CCCCATCACCTTCCTCATCTTCTCCC
							R1-06224	20	59.97	70.00		GGGGAAGGCCAACCGAAGCC
isotig02625	p3	(CAT)8	3	24	214	237	F1-02625	26	57.44	42.31	200	AGTTGGCTTTGCGTTATCCATCATCA
							R1-02625	20	59.82	65.00		AGGTGTCCTCACTGGCGGCT
isotig00535	p3	(CCA)6	3	18	2730	2747
isotig00536	p3	(CCA)6	3	18	2730	2747
isotig02152	p3	(CCA)7	3	21	2557	2577	F1-02152	20	59.90	65.00	277	GGCTGGCCTCACGTGCTGTT
							R1-02152	21	60.18	66.67		CGGAGGTGGTGGTGAGGTCGT
isotig02160	p3	(CCA)8	3	24	935	958	F1-02160	20	59.63	65.00	200	CTTCCTGGCGGTTGCGGTCA
							R1-02160	20	61.22	70.00		CGCTACTCGCGGTGGGGGTT
isotig01162	p3	(CCT)5	3	15	1306	1320	F1-01162	22	59.92	59.09	198	TCCTGGACCATGTCAGCGAGCA
							R1-01162	20	59.84	70.00		GCCCACCGATGAGGAGTGCG
isotig01163	p3	(CCT)5	3	15	1057	1071	F1-01163	22	59.92	59.09	198	TCCTGGACCATGTCAGCGAGCA
							R1-01163	20	59.84	70.00		GCCCACCGATGAGGAGTGCG
isotig02026	p3	(CCT)5	3	15	1035	1049	F1-02026	27	57.89	44.44	246	TGGTAGCGGATTATGCAGATGATGACT
							R1-02026	21	59.15	52.38		ACGGCGCGCGAACATTTTCAA
isotig04541	p3	(CCT)5	3	15	818	832	F1-04541	20	58.62	60.00	200	TGGCCTCAAGCTTCGCCCTT
							F1-04541	20	60.04	70.00		CGTCCGAGGTCAACCGGTGC
isotig07696	p3	(CCT)5	3	15	482	496	F1-07696	20	59.27	65.00	230	CGCCCAGTGTCCCAGCTTGT
							R1-07696	20	59.77	70.00		GCAGTCTTGGAGGAGGCGGC
isotig07758	p3	(CGA)6	3	18	524	541
isotig04289	p3	(CTA)7	3	21	339	359	F1-04289	20	59.53	65.00	197	TGGCCTGCTGATCCCCCAGT
							R1-04289	20	59.90	70.00		TCAGGGGCAGGAGGTGACGG
isotig00916	p3	(CTC)5	3	15	3347	3361	F1-00916	20	60.11	65.00	236	CCGATGCTGCTGCTCTGCGT
							R1-00916	21	59.98	61.90		GGGGGCGCAAGTTGAATCGGT
isotig03043	p3	(CTC)5	3	15	378	392
isotig03164	p3	(CTC)5	3	15	341	355	F1-03164	20	60.32	65.00	200	TGCACCTGTGGGCAAGGGGA
							R1-03164	20	57.49	60.00		TCATGGCTCGGGAGTCGGTT
isotig04471	p3	(CTC)5	3	15	704	718	F1-04471	22	59.72	63.64	203	TGCCATCGGTACCCTCAGGACC
							R1-04471	19	59.96	73.68		GGTGGCCCTCCGACGAGGA
isotig04606	p3	(CTC)5	3	15	327	341	F1-04606	21	59.03	61.90	209	TGCACCAATGGCCTCCTGGTC
							R1-04606	25	59.20	52.00		ACCTGCAGTATCGGGGTACTGTGAA
isotig05066	p3	(CTC)5	3	15	29	43
isotig00840	p3	(CTC)6	3	18	5862	5879	F1-00840	27	59.41	48.15	270	ACGTGTTCGTGTTCGAAGTAATCGAGG
							R1-00840	23	59.27	52.17		TGCACGACCAGACGACAACAACA
isotig02187	p3	(CTG)11	3	33	1574	1606
isotig01232	p3	(CTG)5	3	15	2210	2224	F1-01232	20	59.22	65.00	193	ATAGCGACGGGTTCGGGTGC
							R1-01232	21	59.52	61.90		TCGTGGGGGCGATAAAAGCCG
isotig01597	p3	(CTG)5	3	15	291	305
isotig06934	p3	(CTG)5	3	15	242	256	F1-06934	20	59.97	70.00	272	CGCGGAACCAGAGGTCGTCG
							R1-06934	20	59.97	70.00		CGGCACCACATCCACCACCC
isotig06976	p3	(CTG)5	3	15	499	513	F1-06976	20	60.45	65.00	220	GCGTGCCGAATCCGGCGTTA
							R1-06976	22	59.36	54.54		ACTCAGCAAACGAGCAGCGTCA
isotig00465	p3	(CTT)5	3	15	4010	4024	F1-00465	21	59.53	61.90	194	ACGCTCTTCACGGATTCCGCC
							R1-00465	20	59.97	65.00		GCTGAGGAAGTTGGCCGCGT
isotig00466	p3	(CTT)5	3	15	3322	3336	F1-00466	21	59.53	61.90	194	ACGCTCTTCACGGATTCCGCC
							R1-00466	20	59.97	65.00		GCTGAGGAAGTTGGCCGCGT
isotig00888	p3	(CTT)5	3	15	1711	1725	F1-00888	20	59.70	65.00	177	TTCTTCGGCGCCGGAACTGG
							R1-00888	20	60.11	70.00		GCGCCAGTCTGCTGAGGTCG
isotig00944	p3	(CTT)5	3	15	3157	3171	F1-00944	24	58.94	54.17	233	ACGACCTCATTGCTCACTGGTTCC
							R1-00944	20	58.78	70.00		GAGGGTGACTGGGAGCAGGC
isotig00945	p3	(CTT)5	3	15	398	412	F1-00945	24	58.94	54.17	233	ACGACCTCATTGCTCACTGGTTCC
							R1-00945	20	58.78	70.00		GAGGGTGACTGGGAGCAGGC
isotig02189	p3	(CTT)5	3	15	1635	1649	F1-02189	20	58.90	65.00	200	TTGTGCTGCCTCCACCTGGG
							R1-02189	22	58.13	59.09		AGCAGGAGGAGGTGAGTGAGGA
isotig02898	p3	(CTT)5	3	15	1290	1304	F1-02898	22	59.24	54.54	211	TCAGGCGTTGAATACGCTCGCA
							R1-02898	21	59.98	66.67		CCTGCCCTGGTCGTTTCTGGC
isotig03199	p3	(CTT)5	3	15	16	30
isotig03043	p3	(CTT)6	3	18	504	521
isotig03099	p3	(CTT)6	3	18	1385	1402	F1-03099	20	59.69	65.00	224	CCTCGGGGCTTGCGCTTCTT
							R1-03099	22	58.66	59.09		GCCGACGATGTCGTTGACGATG
isotig04723	p3	(GAA)5	3	15	242	256	F1-04723	20	60.25	70.00	235	CCAGGGAACCCTGCGCCCTA
							R1-04723	20	59.33	65.00		GGATGGTCGCAGGGGGCAAA
isotig07933	p3	(GAA)5	3	15	392	406	F1-07933	20	60.04	70.00	181	CCAAGGCCCCATGCCTGCTC
							R1-07933	20	57.65	60.00		AGCCTGGGATTCAGGCACCA
isotig07252	p3	(GAA)6	3	18	594	611
isotig00011	p3	(GAG)5	3	15	2828	2842
isotig00013	p3	(GAG)5	3	15	2828	2842
isotig00019	p3	(GAG)5	3	15	2828	2842	F1-00019	20	59.58	65	195	CGGCGTCAATTGCTGCGTCC
							R1-00019	22	58.79	59.1		AGCGGTGGAGATGAATCCGACG
isotig00020	p3	(GAG)5	3	15	2828	2842	F1-00020	20	59.58	65	195	CGGCGTCAATTGCTGCGTCC
							R1-00020	22	58.79	59.1		AGCGGTGGAGATGAATCCGACG
isotig00034	p3	(GAG)5	3	15	2828	2842
isotig02434	p3	(GAG)5	3	15	383	397	F1-02434	20	59.77	65.00	189	AGCAGCACATCGAGGCAGGC
							R1-02434	23	60.06	60.87		CGCTCTCAGACGGTTGCTTCACC
isotig03704	p3	(GAG)5	3	15	561	575	F1-03704	20	60.18	70.00	201	AGGGGTGGGAGCCCTTCAGC
							R1-03704	23	59.80	56.52		ACCATGGCCCACAAGACCTCACT
isotig04137	p3	(GAG)5	3	15	412	426	F1-04137	21	60.04	71.43	202	CGAGAGTGGAGGAGGCAGGGG
							R1-04137	20	59.35	65.00		GCCCGGACTTCGGCCTTCAA
isotig04740	p3	(GAG)5	3	15	545	559	F1-04740	20	59.69	65.00	230	TGCCGGAGGCGATGAGGAGT
							R1-04740	20	59.46	65.00		TGGCTGTCTGTCCCTGGGCT
isotig06339	p3	(GAG)6	3	18	555	572	F1-06339	23	59.74	60.87	191	GGCCTCTGCTGAGGAGGATTCCA
							R1-06339	20	59.02	70.00		CCCCCTCCTCATCGTCCCCA
isotig01980	p3	(GAT)10	3	30	1263	1292	F1-01980	26	58.24	50.00	195	AGGACAAGCTACTGGAAGTGAAAGGG
							R1-01980	24	58.22	50.00		ACACAAAATTCCCCATCCCTGGGT
isotig00175	p3	(GAT)5	3	15	552	566	F1-00175	21	58.11	61.9	199	AGTAGGCCGAGGAGAGTGGGT
							R1-00175	25	60.12	56		CGACGGATTTCACAGCAGTACCAGC
isotig00176	p3	(GAT)5	3	15	552	566	F1-00176	21	58.11	61.9	199	AGTAGGCCGAGGAGAGTGGGT
							R1-00176	25	60.12	56		CGACGGATTTCACAGCAGTACCAGC
isotig00177	p3	(GAT)5	3	15	552	566	F1-00177	21	58.11	61.9	199	AGTAGGCCGAGGAGAGTGGGT
							R1-00177	25	60.12	56		CGACGGATTTCACAGCAGTACCAGC
isotig00178	p3	(GAT)5	3	15	552	566	F1-00178	21	58.11	61.9	199	AGTAGGCCGAGGAGAGTGGGT
							R1-00178	25	60.12	56		CGACGGATTTCACAGCAGTACCAGC
isotig00180	p3	(GAT)5	3	15	552	566	F1-00180	21	58.11	61.9	199	AGTAGGCCGAGGAGAGTGGGT
							R1-00180	25	60.12	56		CGACGGATTTCACAGCAGTACCAGC
isotig02114	p3	(GAT)5	3	15	1420	1434	F1-02114	20	59.84	70.00	221	CTCGCAGGATCAACCGCCCC
							R1-02114	23	59.26	60.87		CCCGAGGACTTTGTGGATGAGGC
isotig02886	p3	(GAT)5	3	15	312	326	F1-02886	20	60.53	65.00	159	TGCTGCGTTTGCCAGGGAGC
							R1-02886	20	60.11	70.00		GGCACCGGTACCACATCGCC
isotig05891	p3	(GAT)5	3	15	95	109	F1-05891	22	60.50	63.64	206	GCCGATGTTGGAGGGTGGACCT
							R1-05891	20	59.83	70.00		GGCCGGGCTCACAGTATGGC
isotig07695	p3	(GAT)6	3	18	80	97	F1-07695	27	57.56	44.44	207	TGGTGATAATGATGGTGACGATGAGGA
							R1-07695	24	57.65	50.00		CCATCATTGGTTCCCGTGTGTTCA
isotig03666	p3	(GAT)7	3	21	1275	1295
isotig04036	p3	(GAT)9	3	27	569	595	F1-04036	22	60.36	63.64	222	CGGTGTCGTTGTGGAGGATGCG
							R1-04036	20	59.68	70.00		TCGCTCTCCCCATGTCCCCC
isotig02248	p3	(GCG)7	3	21	2133	2153	F1-02248	20	59.77	65.00	199	CAGCAGGAGCGGCATCGGTT
							R1-02248	20	59.34	65.00		AAACAGGCTGCCGAGGAGGC
isotig02006	p3	(GCT)5	3	15	3452	3466	F1-02006	22	59.52	59.09	195	TGCTACTCCCTGGGGTGCAGTT
							R1-02006	20	60.25	70.00		GGTGAGGCGGGACCATCCCA
isotig04569	p3	(GCT)5	3	15	614	628	F1-04569	24	59.76	54.17	188	TGGGGACGACACACTTGACTCACA
							R1-04569	21	59.71	61.90		AGCCTCGAGCCATCGTCAGGT
isotig01230	p3	(GGA)5	3	15	812	826	F1-01230	21	58.67	61.90	186	TCAGCAAGAGACCGGGGGAGA
							R1-01230	20	59.97	70.00		CCCCACATGCCCACGTCACC
isotig02157	p3	(GGA)5	3	15	1564	1578
isotig06017	p3	(GGC)5	3	15	220	234
isotig00988	p3	(GGT)5	3	15	1586	1600	F1-00988	20	59.63	65.00	207	GCAACCGTCTGAGGCAGCCA
							R1-00988	21	58.55	61.90		AGGGGCTGGCGTTTATCCTGG
isotig00989	p3	(GGT)5	3	15	1586	1600	F1-00989	20	59.63	65.00	170	GCAACCGTCTGAGGCAGCCA
							R1-00989	21	59.52	61.90		ACCCGCACTCACATCGCATCC
isotig03455	p3	(GGT)5	3	15	565	579	F1-03455	20	59.74	65.00	202	AGGGAGGGGGCTGTTGCTGT
							R1-03455	20	59.84	70.00		GAGAGGCGGAGTTGACGCGG
isotig03560	p3	(GGT)5	3	15	271	285	F1-03560	22	58.68	54.54	232	ACTGTGTCCCAATTTCCGCCCA
							R1-03560	23	59.93	60.87		ACGGACGATCCCCATACGAGAGC
isotig06216	p3	(GGT)5	3	15	18	32
isotig04615	p3	(GGT)6	3	18	206	223	F1-04615	20	59.82	70.00	200	TGGTGGAGGAGGTGGCAGGG
							R1-04615	20	59.53	65.00		TGGCGTGATGAGGTGGGGGA
isotig05703	p3	(GGT)6	3	18	333	350	F1-05703	20	59.96	70.00	187	TCATCCTGGGGGCTGGGCTC
							R1-05703	20	59.62	65.00		CACCCGGTGGCCGTTCCAAT
isotig05651	p3	(GGT)7	3	21	226	246	F1-05651	20	60.11	65.00	193	CAGCGCGCTCTGCCATCACT
							R1-05651	20	60.04	70.00		TCTCTGTCTCCGCCGCCTCC
isotig00999	p3	(GGT)8	3	24	375	398	F1-00999	21	59.53	61.90	210	GCACTCGCCAAATGTTCGCCC
							R1-00999	21	58.87	61.90		TCGGAGGTGGACCCAAGACCA
isotig03552	p3	(GTG)5	3	15	25	39	F1-03552	20	59.41	70.00	209	GGGGGCCATGAACTGGTCCG
							R1-03552	20	58.93	70.00		TCCACCTGGAGGGATGGGGG
isotig00306	p3	(GTG)6	3	18	3001	3018	F1-00306	24	59.49	58.33	196	CCTGGACGTGTTGTCCAGTGTACG
							R1-00306	20	59.9	60		TGCGGCATTGAGTTGGCCGT
isotig00307	p3	(GTG)6	3	18	3001	3018	F1-00307	24	59.49	58.33	196	CCTGGACGTGTTGTCCAGTGTACG
							R1-00307	20	59.90	60.00		TGCGGCATTGAGTTGGCCGT
isotig02702	p3	(GTT)5	3	15	1123	1137	F1-02702	23	58.97	52.17	267	GCGCTTGGCAATTCTCACTTGCT
							R1-02702	21	59.91	66.67		TCGGACCCAGGAGTGACAGGC
isotig05092	p3	(GTT)6	3	18	52	69	F1-05092	22	58.74	59.09	181	TCGCTGGTGGTAGAGTCAGGGT
							R1-05092	23	59.63	60.87		GGTGCTGGTGGAAGTCACAGTGG
isotig05379	p3	(GTT)6	3	18	791	808	F1-05379	22	57.92	54.54	213	TCTGTCATTGCCCTCCGTGTGA
							R1-05379	22	58.74	59.09		CGGAGGAATGAAAGGCAACGCC
isotig00051	p3	(TAT)5	3	15	1611	1625
isotig00052	p3	(TAT)5	3	15	1611	1625
isotig00053	p3	(TAT)5	3	15	1611	1625
isotig00054	p3	(TAT)5	3	15	1611	1625
isotig04882	p3	(TAT)5	3	15	295	309	F1-04882	25	59.72	52.00	230	ACAGTCTCATCGTGTCATCCAGGCA
							R1-04882	20	60.11	65.00		ATTGGGGGCCTGTGGGTCGT
isotig07164	p3	(TAT)5	3	15	223	237	F1-07164	22	58.70	54.54	289	TGCACTGTTTCGAAGGCCCAGA
							R1-07164	21	58.66	57.14		ACGTCGTGGTTGTTGACGGGA
isotig00309	p3	(TCA)5	3	15	1041	1055	F1-00309	20	59.49	70.00	179	GCTGGTAGCACCGCAGAGGG
							R1-00309	20	59.12	65.00		TGGGGTGATGCTGGCGATGG
isotig01318	p3	(TCA)5	3	15	1090	1104	F1-01318	20	59.98	65.00	211	GCAGCCGCAGCAACACCAAC
							R1-01318	22	57.23	54.54		TGGTGTCCTTACCCAGCACAGA
isotig01319	p3	(TCA)5	3	15	1066	1080	F1-01319	20	59.98	65.00	187	GCAGCCGCAGCAACACCAAC
							R1-01319	22	57.23	54.54		TGGTGTCCTTACCCAGCACAGA
isotig02179	p3	(TCA)5	3	15	2564	2578	F1-02179	20	60.04	65.00	265	GCAGCCGTCGTCATGGTGCT
							R1-02179	25	59.00	52.00		GCCCACAAGACAATGACGTGAGAGA
isotig02378	p3	(TCA)5	3	15	1420	1434	F1-02378	23	58.64	56.52	296	CGTCATCGTCATCCTCGTCGTCA
							R1-02378	26	58.36	50.00		ACCAGAGGACATCAGCAATCTTGAGG
isotig03287	p3	(TCA)5	3	15	1310	1324	F1-03287	20	60.85	65.00	210	TCGCGTTCTTGGCGTGGTGC
							R1-03287	20	59.69	70.00		CCCCATCCAACCCCACAGCG
isotig03390	p3	(TCA)5	3	15	1254	1268	F1-03390	22	58.03	59.09	180	AGTCCCTCCCATAAAGCCACCG
							R1-03390	26	57.64	46.15		CCTGCAATCTCGATAGATTGGCGAAA
isotig03774	p3	(TCA)5	3	15	582	596	F1-03774	24	57.26	50.00	275	CGACCATTTTCATGGTCTCCGTCA
							R1-03774	22	58.92	54.54		TCGTGAAATTCGCCTCCTGCGA
isotig01222	p3	(TCA)6	3	18	827	844	F1-01222	23	59.93	60.87	192	TCCACCACCTGCCTAGACGTCAC
							R1-01222	20	57.62	60.00		TCCCACGAGACAGGCCAACA
isotig01223	p3	(TCA)6	3	18	827	844	F1-01223	23	59.93	60.87	194	TCCACCACCTGCCTAGACGTCAC
							R1-01223	20	57.62	60.00		TCCCACGAGACAGGCCAACA
isotig05252	p3	(TCA)6	3	18	306	323	F1-05252	22	58.90	59.09	222	GCCAGGAAAGCTTCTCGCCTCT
							R1-05252	20	58.94	60.00		AGCGATGATCCACGCTGCGA
isotig06224	p3	(TCA)6	3	18	168	185
isotig01462	p3	(TCC)5	3	15	816	830	F1-01462	20	57.35	60.00	202	TCGTCGCTCTCCTCTTCGCT
							R1-01462	22	57.32	54.54		ACTCGGAGGGTGTTCAGAGCTT
isotig01463	p3	(TCC)5	3	15	750	764	F1-01463	20	57.35	60.00	202	TCGTCGCTCTCCTCTTCGCT
							R1-01463	22	57.32	54.54		ACTCGGAGGGTGTTCAGAGCTT
isotig03006	p3	(TCC)5	3	15	549	563	F1-03006	21	59.71	66.67	199	TCCTGCTGCTCGTCCTCCTCC
							R1-03006	21	59.58	61.90		TGGAGACTCGGGTGCGTCTGT
isotig02873	p3	(TCC)6	3	18	262	279	F1-02873	20	60.25	70.00	216	GCCTCTTCACTCCCCGCCCT
							R1-02873	20	59.29	70.00		GGCGACTGATCTGGGAGGCG
isotig03834	p3	(TCC)6	3	18	171	188	F1-03834	21	59.30	61.90	190	TGCCACCTAAAAGCCCACCCG
							R1-03834	20	59.17	65.00		TCCGTTGACGTCTCCGCGTC
isotig02960	p3	(TCC)7	3	21	508	528
isotig07074	p3	(TCT)10	3	30	596	625
isotig00848	p3	(TCT)5	3	15	4044	4058	F1-00848	20	60.82	70.00	225	CCTGCAGGGGCCGGTGAGAA
							R1-00848	20	59.97	65.00		AGGAGGCGCTGCAGCTTGTG
isotig02253	p3	(TCT)5	3	15	1604	1618	F1-02253	20	59.97	65.00	233	GGGCGCGGAACTCAAGCTGT
							R1-02253	20	58.95	70.00		GGGAGAGGACGAAGACGCCG
isotig02750	p3	(TCT)5	3	15	349	363
isotig03099	p3	(TCT)5	3	15	1510	1524
isotig03235	p3	(TCT)5	3	15	98	112	F1-03235	22	59.65	68.18	200	CCACCTCTCTGGACCCTTCCCC
							R1-03235	24	59.16	54.17		AGTCTCCAACGATGCTCTGGACCT
isotig04184	p3	(TCT)5	3	15	1062	1076	F1-04184	20	59.83	65.00	200	AGCTCGTGGGTGTCCCCGAA
							R1-04184	21	59.54	61.90		CGAACTCCTCGACGTTCGCGT
isotig05526	p3	(TCT)5	3	15	317	331	F1-05526	23	59.81	65.22	201	GGAGCTCGAAGAGGGACTCAGGG
							R1-05526	20	60.39	70.00		CGTCCCCTTGGCGCATCACC
isotig02750	p3	(TCT)6	3	18	1816	1833
isotig04208	p3	(TCT)8	3	24	1003	1026	F1-04208	21	59.37	61.90	188	GCCTCATTGCCACTGCCTCCA
							R1-04208	22	59.85	59.09		ACTCCAGGCTCCAGCGAAGTGT
isotig00950	p3	(TGA)5	3	15	1366	1380	F1-00950	23	58.38	52.17	217	GCTGCTGCACGTGAGAAAACTGA
							R1-00950	20	57.84	60.00		AGGCGTGCTCACTGCTGTTG
isotig00951	p3	(TGA)5	3	15	1366	1380	F1-00951	23	58.38	52.17	217	GCTGCTGCACGTGAGAAAACTGA
							R1-00951	20	57.84	60.00		AGGCGTGCTCACTGCTGTTG
isotig04212	p3	(TGA)5	3	15	1115	1129
isotig02421	p3	(TGA)6	3	18	1988	2005	F1-02421	20	59.91	70.00	205	GCACGATCTCGCCTCCTGGC
							R1-02421	22	58.65	54.54		AGCATTCTGGCATCGTCGTCCA
isotig08180	p3	(TGA)7	3	21	353	373	F1-08180	21	59.84	66.67	232	CCAGACCCTTGTCCACCCGGA
							R1-08180	27	57.23	44.44		CGTCTGAATCATCAGAATCGTCACTGT
isotig02235	p3	(TGC)5	3	15	2097	2111	F1-02235	21	59.98	61.90	177	GCTGCACGAATTGGCTGGGGA
							R1-02235	21	59.98	61.90		GCCACAACCACCGCAAATGCC
isotig03400	p3	(TGC)5	3	15	469	483	F1-03400	20	60.11	70.00	205	GACGGGCAATAACCCCGCCC
							R1-03400	20	57.22	60.00		ACGATGCCTGGGAGAGTCGT
isotig03797	p3	(TGC)6	3	18	693	710	F1-03797	24	57.63	54.17	203	CGACTTCATCCCCATCTGTTGACG
							R1-03797	20	58.61	70.00		GGGGACGAGTCACCGTCGAG
isotig03938	p3	(TGG)5	3	15	497	511	F1-03938	22	58.22	59.09	259	ACTGCCTGGACATTCCTGGACC
							R1-03938	20	57.51	60.00		AGCGGATGTCACGTCCCAGA
isotig04288	p3	(TGG)5	3	15	177	191	F1-04288	20	59.97	70.00	195	CTTGGCGGAGGGGCAAAGGG
							R1-04288	20	59.90	70.00		GCTGTGGGTTGGGGCTGGAC
isotig01196	p3	(TGG)6	3	18	1551	1568	F1-01196	20	59.97	70.00	193	GAGGCCTTGTCCCCGCACAC
							R1-01196	20	59.97	65.00		GGCCGGCAATTCCACCGACA
isotig02332	p3	(TGG)6	3	18	885	902	F1-02332	20	59.26	65.00	202	AGGTTGGCTTGGCTGGGAGC
							R1-02332	20	60.25	70.00		AGCCCATCCACCCCCTCAGC
isotig02477	p3	(TGG)6	3	18	123	140	F1-02477	20	60.11	70.00	181	GTTCGTGCGAGAGGCGGTCC
							R1-02477	23	59.22	56.52		ACACTCGACCTGTGATGTGACGC
isotig02647	p3	(TGT)5	3	15	368	382	F1-02647	24	59.20	54.17	172	GGAACACGGTCCCGTTTTTCTTGC
							R1-02647	20	59.62	65.00		GCCGCTGAGAAGGCCACCAA
isotig05610	p3	(TGT)5	3	15	29	43	F1-05610	24	59.83	50.00	219	TGCTGTTGCTGTTGTTGTTGCTGC
							R1-05610	20	59.84	70.00		GCCGAGCCCTGGGAATCGTG
isotig00808	p3	(TTA)5	3	15	312	326	F1-00808	27	57.56	44.44	206	GGGAACAATAATGCAGTTTACGATGCG
							R1-00808	21	59.72	66.67		CGTCCACCAGTTCTCGGGTGC
isotig00809	p3	(TTA)5	3	15	312	326	F1-00809	27	57.56	44.44	206	GGGAACAATAATGCAGTTTACGATGCG
							R1-00809	22	59.53	59.09		AGTCCACCAGTTCTCGGGTGCT
isotig02013	p3	(TTA)5	3	15	3654	3668
isotig04334	p3	(TTA)7	3	21	159	179	F1-04334	23	58.40	56.52	208	TCAAGACAGGGTAGGTGGTGGGA
							R1-04334	23	58.20	52.17		TCACGCAGGACCAAAGAACAGGA
isotig02624	p3	(TTA)9	3	27	1148	1174
isotig00290	p3	(TTC)10	3	30	1186	1215	F1-00290	21	59.2	66.67	193	CCTCCCTCGGAAACGGTCCCT
							R1-00290	21	59.84	61.9		TGACGAGGAACAGGGGCTGGA
isotig00292	p3	(TTC)10	3	30	1094	1123	F1-00292	21	59.63	66.67	193	CCTCCCTCGGAAACGGTCCCT
							R1-00292	21	59.22	61.9		TGACGAGGAACAGGGGCTGGA
isotig00291	p3	(TTC)5	3	15	1186	1200	F1-00291	21	59.63	66.67	221	CCTCCCTCGGAAACGGTCCCT
							R1-00291	21	59.29	61.9		ACGGCAGCTGTGGTAGGGAGA
isotig00293	p3	(TTC)5	3	15	1094	1108	F1-00293	21	59.63	66.67	221	CCTCCCTCGGAAACGGTCCCT
							R1-00293	21	59.29	61.9		ACGGCAGCTGTGGTAGGGAGA
isotig00982	p3	(TTC)5	3	15	1622	1636
isotig02617	p3	(TTC)5	3	15	1684	1698	F1-02617	20	57.70	60.00	182	ACCTGCGACAGGCTCTCCAA
							R1-02617	20	59.56	70.00		GATCCCACGCCAGAGTCGCC
isotig04080	p3	(TTC)5	3	15	229	243	F1-04080	23	59.99	60.87	210	GCATGCATGTGATAGCCGAGGGG
							R1-04080	25	59.28	52.00		TGTCGAGGCTGAAAATGTGGAGACG
isotig04208	p3	(TTC)5	3	15	849	863
isotig00329	p3	(TTC)7	3	21	2843	2863	F1-00329	23	57.32	52.17	255	TCAGGTTCCACCCATTCTTCCCA
							R1-00329	20	59.63	65.00		TGCCCCAACTTCACCGCGAG
isotig00330	p3	(TTC)7	3	21	2109	2129	F1-00330	23	57.32	52.17	255	TCAGGTTCCACCCATTCTTCCCA
							R1-00330	20	59.63	65.00		TGCCCCAACTTCACCGCGAG
isotig03631	p3	(TTG)5	3	15	536	550	F1-03631	23	59.12	56.52	202	GGTAGTGGAATTGGCTGCCCACA
							R1-03631	21	58.97	57.14		AGCAGCTGTTGCTGCTGGACT
isotig03731	p3	(TTG)5	3	15	206	220	F1-03731	20	60.18	65.00	222	GCTGCTGTTGGTGGTGGCGA
							R1-03731	21	59.12	66.67		CCCGGGTGGTGAGAGAAACCG
isotig05511	p3	(TTG)5	3	15	483	497	F1-05511	26	57.27	42.31	214	TGTGCAACAGATGGTTTGTTGTTGTC
							R1-05511	20	60.32	65.00		GCCAGCGGCGGCTTACAGTT
isotig03570	p4	(AAAC)3	4	12	96	107	F1-03570	22	57.01	54.54	139	GGCACGTAGTGGCATGAGTCTT
							R1-03570	23	57.48	47.83		TGCGAAACTCCAATTGCACAGGA
isotig02183	p4	(AAAG)3	4	12	593	604	F1-02183	22	58.05	50.00	162	ACCAGGGGCGCAAAGTTTTGTT
							R1-02183	24	57.19	50.00		ACTCGACATGAGTACGGAGACACA
contig00047	p4	(AAAT)3	4	12	324	335
isotig00243	p4	(AAAT)3	4	12	1075	1086
isotig00244	p4	(AAAT)3	4	12	1075	1086	F1-00244	21	59.78	61.9	257	ACGGAAATTCCCTCGCTGCCG
							R1-00244	22	57.64	54.54		AGGATGTCTTGCCCTCGGTTCA
isotig00890	p4	(AAAT)3	4	12	1225	1236	F1-00890	23	59.76	60.87	214	CCCGTGACAAAGCCGAGTACACC
							R1-00890	20	57.45	55.00		TCTGCACCGTTGGCATTGCT
isotig00891	p4	(AAAT)3	4	12	1225	1236	F1-00891	23	59.76	60.87	214	CCCGTGACAAAGCCGAGTACACC
							R1-00891	20	57.45	55.00		TCTGCACCGTTGGCATTGCT
isotig01108	p4	(AAAT)3	4	12	1462	1473	F1-01108	21	60.05	66.67	179	ACTAGAGTCTCGCCGGTGCCC
							R1-01108	20	58.79	65.00		TCCTTCCCTCCCAGCACCCA
isotig01320	p4	(AAAT)3	4	12	100	111	F1-01320	23	57.03	52.17	274	CCCTCGTTTCGCATTAACCGTTG
							R1-01320	23	59.57	60.87		GCGATTGTCCAGCCTTACTGGGG
isotig01400	p4	(AAAT)3	4	12	1393	1404
isotig01489	p4	(AAAT)3	4	12	844	855	F1-01489	21	60.11	61.90	226	TGGTTAGTGGCCTGGCAGCCT
							R1-01489	26	57.82	50.00		GTGACCCGTGTCGCTTTCTAAATAGG
isotig01991	p4	(AAAT)3	4	12	4186	4197
isotig02118	p4	(AAAT)3	4	12	334	345
isotig02222	p4	(AAAT)3	4	12	627	638	F1-02222	20	59.56	65.00	217	ATGAGGGCGCCATACCGTGC
							R1-02222	21	57.86	57.14		TCCTCACACGTCACTGCTCGT
isotig02299	p4	(AAAT)3	4	12	190	201	F1-02299	27	57.79	48.15	201	TCAATAATGAGGACTTCAGGACCGGAG
							R1-02299	22	60.05	59.09		CGAGAATGGCGAGGCAAAGGCA
isotig02877	p4	(AAAT)3	4	12	1231	1242	F1-02877	26	57.03	46.15	112	CACCAAAGCTAGGGTGAAAAGGAAGA
							R1-02877	27	57.53	44.44		TCGGTTATTCTCCCATTCTCTCGTTCA
isotig03265	p4	(AAAT)3	4	12	99	110
isotig04404	p4	(AAAT)3	4	12	749	760	F1-04404	26	57.31	42.31	221	TTCGTTGTACGATATTCCCACGCAAT
							R1-04404	22	57.75	54.54		AGCTCCAACAGTTCCACCACCT
isotig04670	p4	(AAAT)3	4	12	219	230	F1-04670	19	59.82	68.42	261	GGGCAGCAGCCTGCGCTAT
							R1-04670	20	59.77	70.00		CCTCCACCGCCTTCGCTGAC
isotig06348	p4	(AAAT)3	4	12	8	19
isotig06791	p4	(AAAT)3	4	12	348	359
isotig07585	p4	(AAAT)3	4	12	511	522	F1-07585	23	59.68	52.17	210	TGGCCATCAAGCATTTGCCGACT
							R1-07585	26	57.71	50.00		GGGTGATGTTCGTATAATCTCGTGGC
isotig08183	p4	(AAAT)3	4	12	363	374	F1-08183	20	59.63	65.00	128	AGGCGACGTTGTTCAGGCCC
							R1-08183	22	58.15	54.54		TCCCCGAAATGTTGGCTCTGGT
isotig00440	p4	(AAGA)3	4	12	4519	4530	F1-00440	20	59.78	65.00	236	CCACACAAAAGCGCGAGGCG
							R1-00440	24	58.64	54.17		CCAGTGAGGCAGACTTTACTGGCA
isotig00441	p4	(AAGA)3	4	12	4327	4338	F1-00441	20	59.78	65.00	236	CCACACAAAAGCGCGAGGCG
							R1-00441	24	58.64	54.17		CCAGTGAGGCAGACTTTACTGGCA
isotig00442	p4	(AAGA)3	4	12	1305	1316	F1-00442	20	59.78	65.00	236	CCACACAAAAGCGCGAGGCG
							R1-00442	24	58.64	54.17		CCAGTGAGGCAGACTTTACTGGCA
isotig00535	p4	(AAGA)3	4	12	793	804
isotig00536	p4	(AAGA)3	4	12	793	804
isotig02215	p4	(AAGT)3	4	12	1108	1119	F1-02215	25	57.89	52.00	232	AGGCTATTACTAGCAGTGCTGGACC
							R1-02215	24	57.42	50.00		TCCGATCCTCCCATTCACATCACA
isotig00724	p4	(AATA)3	4	12	1772	1783	F1-00724	21	57.35	57.14	224	TCCGATGGCCACTCGAACTCT
							R1-00724	23	57.15	47.83		AGCGATTTGACGGTTTCATCCGA
isotig00725	p4	(AATA)3	4	12	1772	1783	F1-00725	21	57.35	57.14	224	TCCGATGGCCACTCGAACTCT
							R1-00725	23	57.15	47.83		AGCGATTTGACGGTTTCATCCGA
isotig01172	p4	(AATA)3	4	12	478	489
isotig01173	p4	(AATA)3	4	12	478	489
isotig01221	p4	(AATA)3	4	12	296	307	F1-01221	22	60.31	68.18	165	CCCCCAGGACCTCTTCTGCTCG
							R1-01221	20	59.97	70.00		TCCCTGTGCCTACCCTCGGC
isotig01372	p4	(AATA)3	4	12	1828	1839
isotig01373	p4	(AATA)3	4	12	584	595
isotig02022	p4	(AATA)3	4	12	2292	2303	F1-02022	24	60.00	54.17	181	ACGCAGGTAGTGATCTGCTTCGGT
							R1-02022	24	58.72	54.17		TCACCACGACCTGTTCAATCCTCG
isotig02022	p4	(AATA)3	4	12	2886	2897
isotig02433	p4	(AATA)3	4	12	1861	1872
isotig02755	p4	(AATA)3	4	12	1611	1622	F1-02755	21	59.31	57.14	224	ACCACGAACTCCAATGGCGCA
							R1-02755	21	59.66	61.90		CCGCGAACTGTGTTCCGGTCA
isotig03775	p4	(AATA)3	4	12	35	46
isotig04018	p4	(AATA)3	4	12	205	216	F1-04018	24	57.90	50.00	163	TGGTTGGAGTTATCCCATCGTGCT
							R1-04018	21	57.42	57.14		TGGGGTTCCATGCAGTGAGGA
isotig04438	p4	(AATA)3	4	12	1024	1035	F1-04438	20	58.73	60.00	185	TGCTCGCACTTCGAGGCACT
							R1-04438	22	59.42	59.09		CCCAGCGCTTTGCAAACTTCCC
isotig04512	p4	(AATA)3	4	12	1028	1039	F1-04512	20	59.13	65.00	181	CGCCATGGTGCCCTTACGGA
							R1-04512	23	57.67	52.17		ACGTTTCATTCCGTGGTCACTCG
isotig05048	p4	(AATA)3	4	12	187	198	F1-05048	21	59.33	57.14	209	ACGTGGCACAACATCGGTCGT
							R1-05048	23	58.21	52.17		ACCGGTCGTTGTTTACACCCTCA
isotig07131	p4	(AATA)3	4	12	9	20
isotig07154	p4	(AATA)3	4	12	89	100	F1-07154	26	57.53	46.15	164	TCAGTCCCGTCTCAAAATACAGTGGA
							R1-07154	20	60.04	70.00		CCACCAGAAGCGCCTGTCCG
isotig07286	p4	(AATA)3	4	12	58	69
isotig01042	p4	(AATA)4	4	16	1847	1862
isotig05112	p4	(AATA)4	4	16	180	195	F1-05112	27	57.95	44.44	281	TGAGATTACGACCTTGTACAGCCATGT
							R1-05112	23	57.00	47.83		TGGCTCGGACGATTTGTTCAGTT
isotig05650	p4	(AATA)4	4	16	768	783
isotig00742	p4	(AATA)5	4	20	1848	1867
isotig00296	p4	(AATC)3	4	12	39	50
isotig00598	p4	(AATC)3	4	12	402	413	F1-00598	20	57.90	60.00	238	TGGCCGATGTCAAGTGCAGC
							R1-00598	25	57.61	48.00		GAAGCAAACGTAATAATGGCCCCCT
isotig01044	p4	(AATC)3	4	12	51	62	F1-01044	27	58.71	51.85	217	GGTCTTAGAGTCCTCAAACGTCATGGG
							R1-01044	27	57.75	44.44		TGGAAAACTGGAATGAACCAGAGGAGA
isotig01045	p4	(AATC)3	4	12	51	62	F1-01045	27	58.71	51.85	217	GGTCTTAGAGTCCTCAAACGTCATGGG
							R1-01045	27	57.75	44.44		TGGAAAACTGGAATGAACCAGAGGAGA
isotig01342	p4	(AATC)3	4	12	451	462	F1-01342	21	60.05	61.90	173	AGGTCGTGTTCATCCGCGTGC
							R1-01342	24	59.55	58.33		GCATCTCACTATCGTACCAGCCGC
isotig01343	p4	(AATC)3	4	12	451	462	F1-01343	21	60.05	61.90	173	AGGTCGTGTTCATCCGCGTGC
							R1-01343	24	59.55	58.33		GCATCTCACTATCGTACCAGCCGC
isotig04923	p4	(AATC)3	4	12	850	861
isotig02665	p4	(AATG)3	4	12	129	140	F1-02665	21	58.15	57.14	177	AGCGATCCACCTTGACCAGCA
							R1-02665	22	58.01	54.54		TCAGTCAAACTCGCCGTAGGCT
isotig05482	p4	(AATG)3	4	12	168	179	F1-05482	20	60.25	65.00	228	ACCGCGCTCAGACAGCCTCT
							R1-05482	21	58.34	57.14		ACTGAGGAAGGCAGCAAGGCA
isotig00268	p4	(AATT)3	4	12	2197	2208	F1-00268	22	59.63	59.09	221	CGAGCGACAAAATTCGTGGGCG
							R1-00268	24	59.04	58.33		ACGCCCTTAGTCCTCATCTCCTCC
isotig00269	p4	(AATT)3	4	12	1990	2001	F1-00269	22	59.63	59.09	221	CGAGCGACAAAATTCGTGGGCG
							R1-00269	24	59.04	58.33		ACGCCCTTAGTCCTCATCTCCTCC
isotig00270	p4	(AATT)3	4	12	1588	1599	F1-00270	22	59.63	59.09	221	CGAGCGACAAAATTCGTGGGCG
							R1-00270	24	59.04	58.33		ACGCCCTTAGTCCTCATCTCCTCC
isotig00271	p4	(AATT)3	4	12	1307	1318	F1-00271	22	59.63	59.09	221	CGAGCGACAAAATTCGTGGGCG
							R1-00271	24	59.04	58.33		ACGCCCTTAGTCCTCATCTCCTCC
isotig00443	p4	(AATT)3	4	12	1472	1483
isotig00444	p4	(AATT)3	4	12	1472	1483
isotig00655	p4	(AATT)3	4	12	1774	1785
isotig00842	p4	(AATT)3	4	12	3436	3447	F1-00842	24	58.04	50.00	242	TCAATCCCCCGATAATCGCACAGT
							R1-00842	21	58.86	57.14		ACGCCCAACTCGAATCAGCGA
isotig00843	p4	(AATT)3	4	12	3278	3289	F1-00843	24	58.04	50.00	242	TCAATCCCCCGATAATCGCACAGT
							R1-00843	21	58.86	57.14		ACGCCCAACTCGAATCAGCGA
isotig01152	p4	(AATT)3	4	12	1462	1473	F1-01152	24	57.88	58.33	201	GGTACAGGGAGAGAGGGAGACTGA
							R1-01152	20	58.30	65.00		CCCCAGGGCCTTGTGGATGT
isotig02144	p4	(AATT)3	4	12	8	19
isotig02364	p4	(AATT)3	4	12	22	33
isotig02505	p4	(AATT)3	4	12	1942	1953	F1-02505	20	60.11	65.00	235	ACGCAGTGGTGTCTCCCCGT
							R1-02505	27	57.54	40.74		TGCAATCGCAGAAAACACATTGTAACC
isotig02520	p4	(AATT)3	4	12	196	207	F1-02520	22	60.05	63.64	161	GGGCGTTTCCCCGAGTTCTTCG
							R1-02520	22	58.53	54.54		ACGAGTGTCTCCATGTGCGTGT
isotig02707	p4	(AATT)3	4	12	61	72
isotig02790	p4	(AATT)3	4	12	13	24
isotig02944	p4	(AATT)3	4	12	74	85
isotig03004	p4	(AATT)3	4	12	259	270	F1-03004	25	57.92	48.00	220	ACCGGAGAAAAAGACCAAAGCACTG
							R1-03004	27	58.51	44.44		TGAGAACACGTGAACTCTCAAAGTCGT
isotig03158	p4	(AATT)3	4	12	257	268	F1-03158	20	59.35	65.00	181	AGGAGTTCCCGCTGTTGGCG
							R1-03158	20	59.17	65.00		CTGCAGTCGCAGGTGCAAGC
isotig03339	p4	(AATT)3	4	12	1369	1380
isotig03468	p4	(AATT)3	4	12	855	866	F1-03468	20	59.97	65.00	199	CCACAGCCGCGCAGTCAGAA
							R1-03468	22	59.23	59.09		CAGTCCTGCTGGATTTCCGCGA
isotig03875	p4	(AATT)3	4	12	97	108	F1-03875	24	57.17	45.83	211	TGACGCAGCCAATGATTTCACTCT
							R1-03875	24	57.03	45.83		AACCACCGATTCTACGAAATGCGA
isotig04076	p4	(AATT)3	4	12	1126	1137
isotig04243	p4	(AATT)3	4	12	47	58
isotig04464	p4	(AATT)3	4	12	65	76
isotig04972	p4	(AATT)3	4	12	51	62
isotig05583	p4	(AATT)3	4	12	490	501	F1-05583	21	59.70	66.67	239	GCCCGGAGGTCTTCCAGGGAT
							R1-05583	20	60.11	65.00		CCGACGAATGTCGCCACGCT
isotig06871	p4	(AATT)3	4	12	261	272	F1-06871	27	57.25	40.74	231	TGGAGGCAATCAAAATTCCTCGAATGA
							R1-06871	21	59.98	66.67		TCCTGGGGTACTCGGCTGCTG
isotig07037	p4	(AATT)3	4	12	619	630
isotig07273	p4	(AATT)3	4	12	517	528
isotig08012	p4	(AATT)3	4	12	331	342	F1-08012	21	60.04	66.67	210	GGGCTGGCTTCGGCCTAGGTA
							R1-08012	24	57.50	50.00		AGACTGGCAGAGCTTTCACGATTG
isotig04282	p4	(AATT)4	4	16	74	89	F1-04282	27	57.92	44.44	281	TCTGCAGGGACAGAAGTTGTTTATTGC
							R1-04282	22	59.86	59.09		AGGTGGAGTCGTTCGTCAGGCA
isotig05463	p4	(AATT)4	4	16	167	182
isotig06464	p4	(AATT)4	4	16	534	549	F1-06464	19	58.60	68.42	300	CGCCCTCGTCTCGGCTGAT
							R1-06464	20	58.33	65.00		CGCGATGGACCTCTCGTGGA
isotig02892	p4	(ACAA)3	4	12	503	514	F1-02892	24	60.00	58.33	244	GGCGTTGAAGGAAAGGAAGAGCCC
							R1-02892	21	57.12	52.38		ACCCGCATGCGAATGAGTGAA
isotig03604	p4	(ACAG)3	4	12	530	541	F1-03604	21	57.30	52.38	201	TGCTGTTTGTCAGACGCACGA
							R1-03604	21	59.41	66.67		GGCTCGTCCTCGTCGTGATCG
isotig04376	p4	(ACAG)3	4	12	438	449	F1-04376	23	59.34	52.17	212	GCAAGCGACATCATGCCATGCAA
							R1-04376	20	58.06	60.00		ACGGATGGTTCTGGTCGGCA
isotig01987	p4	(ACAT)3	4	12	2387	2398
isotig05810	p4	(ACAT)3	4	12	22	33	F1-05810	24	58.52	50.00	115	GGATCACTGCCAAGGTCAAAACGA
							R1-05810	20	59.85	65.00		GCTGTCGTCGGCGTGTCGAT
isotig06719	p4	(ACCA)3	4	12	527	538	F1-06719	20	60.03	65.00	122	TTGCCCCGTTTCCCCCTGGA
							R1-06719	27	59.50	51.85		CGGCGTAGTTGTTTTATAGGAGCAGGG
isotig03158	p4	(ACCC)3	4	12	1358	1369
isotig01650	p4	(ACGG)3	4	12	633	644	F1-01650	20	57.45	60.00	212	ACCCACCGACGTCCTACGTT
							R1-01650	20	59.50	70.00		CGGGTACGGGAACGAACGGG
isotig06046	p4	(ACTC)3	4	12	15	26
isotig00634	p4	(AGGG)3	4	12	1057	1068	F1-00634	20	59.85	65.00	174	GTGTGCAGCATGTGCGCGAG
							R1-00634	20	59.70	65.00		TCCGCCGGTCAAGCACTTCG
isotig00635	p4	(AGGG)3	4	12	1057	1068	F1-00635	20	59.85	65.00	174	GTGTGCAGCATGTGCGCGAG
							R1-00635	20	59.70	65.00		TCCGCCGGTCAAGCACTTCG
isotig00636	p4	(AGGG)3	4	12	1057	1068	F1-00636	20	59.85	65.00	174	GTGTGCAGCATGTGCGCGAG
							R1-00636	20	59.70	65.00		TCCGCCGGTCAAGCACTTCG
isotig00268	p4	(ATAA)3	4	12	357	368
isotig00269	p4	(ATAA)3	4	12	150	161
isotig00272	p4	(ATAA)3	4	12	357	368	F1-00272	23	58.52	52.17	183	ACTGGAGTGTGTGCATTGTCGGA
							R1-00272	20	59.97	65		CTTGCTGTGTCGCGCTCCCA
isotig00273	p4	(ATAA)3	4	12	150	161	F1-00273	20	59.61	65	209	TCATCCCCCGCCCGAGTGAA
							R1-00273	21	59.59	66.67		GGCTTGACATCGGCCTCCTCG
isotig00770	p4	(ATAA)3	4	12	68	79
isotig00771	p4	(ATAA)3	4	12	68	79
isotig00906	p4	(ATAA)3	4	12	2337	2348	F1-00906	24	58.47	50.00	182	TGAGCATAAGCGACAGCAAGAGGT
							R1-00906	27	57.02	44.44		ATCTATCAGTTCGACGTAATCCTCCGA
isotig00907	p4	(ATAA)3	4	12	1854	1865	F1-00907	24	58.47	50.00	182	TGAGCATAAGCGACAGCAAGAGGT
							R1-00907	27	57.02	44.44		ATCTATCAGTTCGACGTAATCCTCCGA
isotig01072	p4	(ATAA)3	4	12	1251	1262	F1-01072	22	59.67	59.09	191	GTCTCCAAGGCACTGAGCGCAA
							R1-01072	20	57.36	55.00		TGGCGCAGGCCTTTGTTTCT
isotig02205	p4	(ATAA)3	4	12	179	190
isotig02698	p4	(ATAA)3	4	12	1594	1605	F1-02698	23	58.40	52.17	199	AGGCTTGACGATGATGGACGTGT
							R1-02698	20	57.25	55.00		TTCAACCGCGGAACGTCGAA
isotig03918	p4	(ATAA)3	4	12	462	473	F1-03918	27	57.14	40.74	258	TCACCACAATTTACCCGAATTCCTTGT
							R1-03918	23	58.87	56.52		AGGAAGCAATGAGGAAACGGGGG
isotig04020	p4	(ATAA)3	4	12	785	796	F1-04020	23	58.46	52.17	234	AGGCACTTGTCACGTCTCCAACA
							R1-04020	20	57.68	60.00		TTACCGGCGACGGTTTGTCG
isotig04326	p4	(ATAA)3	4	12	1004	1015	F1-04326	23	58.90	52.17	297	TGCACATAGCTGCTGTGGAACGA
							R1-04326	27	57.85	40.74		TGACTGCAGTTTCTGCAAAATGATGGA
isotig04486	p4	(ATAA)3	4	12	1057	1068
isotig05026	p4	(ATAA)3	4	12	302	313	F1-05026	20	59.76	65.00	194	GCGAAGCTCGATGGGGCCAA
							R1-05026	20	60.32	70.00		AGCCCGGGATTCCCCTCTGC
isotig05690	p4	(ATAA)3	4	12	45	56
isotig00743	p4	(ATAA)4	4	16	1850	1865
isotig03210	p4	(ATAA)4	4	16	178	193	F1-03210	22	57.48	54.54	146	TCGTTCACAAACGAGTCCCTGC
							R1-03210	20	58.65	60.00		TGCCAAAGTCGCGGGTCTGA
isotig03608	p4	(ATAC)3	4	12	49	60
isotig00840	p4	(ATCA)3	4	12	2629	2640
isotig00904	p4	(ATCA)3	4	12	572	583	F1-00904	20	59.42	70.00	268	GTCTGCCGACCAGTCCCTGC
							R1-00904	20	59.97	70.00		CCCTCCCGTGCAGTTGCCAG
isotig00905	p4	(ATCA)3	4	12	572	583	F1-00905	20	59.42	70.00	268	GTCTGCCGACCAGTCCCTGC
							R1-00905	20	59.97	70.00		CCCTCCCGTGCAGTTGCCAG
isotig01566	p4	(ATCA)3	4	12	4	15
isotig01567	p4	(ATCA)3	4	12	4	15
isotig03560	p4	(ATCG)3	4	12	1103	1114
isotig01182	p4	(ATGA)3	4	12	1588	1599	F1-01182	23	58.84	60.87	211	CCGATGAGTCACTTCCGGGATGG
							R1-01182	20	57.99	60.00		TGGAGCTGTGGCGAAGGTGA
isotig01183	p4	(ATGA)3	4	12	690	701	F1-01183	23	58.84	60.87	211	CCGATGAGTCACTTCCGGGATGG
							R1-01183	20	57.99	60.00		TGGAGCTGTGGCGAAGGTGA
isotig00287	p4	(ATTA)3	4	12	1555	1566	F1-00287	21	59.2	66.67	199	GGGGAGAACGGAGTGAGTGCG
							R1-00287	21	59.84	61.9		AGCTGTGCTCCAACGAGGGGA
isotig00288	p4	(ATTA)3	4	12	1116	1127	F1-00288	21	59.2	66.67	199	GGGGAGAACGGAGTGAGTGCG
							R1-00288	21	59.84	61.9		AGCTGTGCTCCAACGAGGGGA
isotig00412	p4	(ATTA)3	4	12	282	293	F1-00412	25	58.01	48.00	188	ACAAAAGGTGAAGAGTGAAGCGACG
							R1-00412	21	59.49	61.90		ACGAGAAAGGAGCCCACCCCA
isotig00413	p4	(ATTA)3	4	12	282	293	F1-00413	25	58.01	48.00	188	ACAAAAGGTGAAGAGTGAAGCGACG
							R1-00413	21	59.49	61.90		ACGAGAAAGGAGCCCACCCCA
isotig00414	p4	(ATTA)3	4	12	282	293	F1-00414	25	58.01	48.00	188	ACAAAAGGTGAAGAGTGAAGCGACG
							R1-00414	21	59.49	61.90		ACGAGAAAGGAGCCCACCCCA
isotig00415	p4	(ATTA)3	4	12	282	293	F1-00415	25	58.01	48.00	188	ACAAAAGGTGAAGAGTGAAGCGACG
							R1-00415	21	59.49	61.90		ACGAGAAAGGAGCCCACCCCA
isotig00585	p4	(ATTA)3	4	12	359	370	F1-00585	20	60.25	70.00	212	GCTGCTCCTCCGTCACCCCT
							R1-00585	26	57.77	46.15		TCACCTTGACATAAGCCCAATACCCA
isotig01414	p4	(ATTA)3	4	12	495	506
isotig02151	p4	(ATTA)3	4	12	2624	2635
isotig02300	p4	(ATTA)3	4	12	2292	2303	F1-02300	20	59.90	65.00	123	AAAGCCACCGCTGACACCCG
							R1-02300	20	59.83	60.00		ACACTTCGCACTTGGCCGCA
isotig02796	p4	(ATTA)3	4	12	69	80
isotig03291	p4	(ATTA)3	4	12	1478	1489
isotig03296	p4	(ATTA)3	4	12	97	108
isotig03804	p4	(ATTA)3	4	12	922	933	F1-03804	23	58.78	56.52	198	ACTCATCACCCCCTGCTACACCT
							R1-03804	26	57.26	46.15		ACTCACCTGGGCTATTTACTCTGGTT
isotig04390	p4	(ATTA)3	4	12	861	872	F1-04390	21	58.80	61.90	203	AGGCCTGTCACACACTCGACG
							R1-04390	22	58.60	54.54		ACGCAGTCCATGCTACGACACA
isotig04890	p4	(ATTA)3	4	12	102	113	F1-04890	20	58.28	65.00	238	GGAGCAGCTCGGGCAGGTAT
							R1-04890	23	60.05	60.87		GGGTCACTGGACCCTCACAACCA
isotig06316	p4	(ATTA)3	4	12	578	589	F1-06316	20	59.16	65.00	256	CCCTTCACGCGCTCGTCTCA
							R1-06316	20	59.69	70.00		GGCAAGGTGCGTCCTCCTGG
isotig06946	p4	(ATTA)3	4	12	81	92	F1-06946	22	57.49	54.54	150	TCACGAACGACATGCGAGTACG
							R1-06946	20	59.71	65.00		AACTGCGAGGGCGACGACAC
isotig08268	p4	(ATTA)3	4	12	190	201	F1-08268	22	59.07	59.09	233	ACCCCGACTCTGGCTAGCTTCA
							R1-08268	22	59.54	54.54		ACAGCAGGCGACAGTTTGCAGT
isotig08273	p4	(ATTA)3	4	12	65	76	F1-08273	24	59.22	54.17	183	ACGAAGGAGCTGAGGTGATAGCCA
							R1-08273	22	60.12	63.64		CGAGTGAACGCTGAGCAGTCGG
isotig02944	p4	(ATTA)4	4	16	1235	1250
isotig02823	p4	(ATTA)5	4	20	1634	1653	F1-02823	22	57.72	54.54	262	GTGCAGCACTTCCGGTTGTGTA
							R1-02823	20	58.76	60.00		AGTTCGTGGACGACGCGACA
isotig00571	p4	(ATTC)3	4	12	2594	2605	F1-00571	20	59.83	65.00	224	TGGCTGAGGTGGACGGAGCA
							R1-00571	20	58.67	60.00		TCCGGTGTCGTGCTTGTCGT
isotig00572	p4	(ATTC)3	4	12	1281	1292	F1-00572	20	59.83	65.00	224	TGGCTGAGGTGGACGGAGCA
							R1-00572	20	58.67	60.00		TCCGGTGTCGTGCTTGTCGT
isotig01478	p4	(ATTC)3	4	12	694	705	F1-01478	24	57.16	50.00	184	AGATATGCGCCTCTTCACAACTCG
							R1-01478	24	59.32	54.17		GCACAAGAAAATGCGTCAGGGTCG
isotig02426	p4	(ATTC)3	4	12	357	368
isotig02602	p4	(ATTC)3	4	12	185	196	F1-02602	20	59.97	60.00	228	TGCGGGACGCGATTGCTTGT
							R1-02602	20	59.13	65.00		AGGGCAGCGATGGACAGCAG
isotig03243	p4	(ATTC)3	4	12	43	54	F1-03243	21	59.58	61.90	171	TGACTGCTCGGGGACGACTGT
							R1-03243	20	57.26	60.00		TGCAGTTCATGGCCCTCACG
isotig03984	p4	(ATTC)3	4	12	614	625	F1-03984	22	59.19	59.09	201	CGTCGGCTTCACCAACAAAGGC
							R1-03984	21	57.90	57.14		AGACCGAATGGTCGTCCAGCA
isotig04173	p4	(ATTC)3	4	12	144	155
isotig03689	p4	(ATTG)3	4	12	1229	1240
isotig01993	p4	(ATTG)4	4	16	2640	2655	F1-01987	20	59.26	65.00	180	AGGACTTCGCCGAGGGTGGA
							R1-01987	20	60.45	65.00		ATCCATCGGCGTGCGCTTGG
isotig00529	p4	(ATTT)3	4	12	247	258	F1-00529	25	58.99	48.00	201	GCGTTCAACCGCAAAATTACATGCG
							R1-00529	25	57.08	48.00		ACACTTATGAAGGTTCGCTGTCTGG
isotig00530	p4	(ATTT)3	4	12	247	258	F1-00530	25	58.99	48.00	201	GCGTTCAACCGCAAAATTACATGCG
							R1-00530	25	57.08	48.00		ACACTTATGAAGGTTCGCTGTCTGG
isotig00531	p4	(ATTT)3	4	12	247	258	F1-00531	25	58.99	48.00	201	GCGTTCAACCGCAAAATTACATGCG
							R1-00531	25	57.08	48.00		ACACTTATGAAGGTTCGCTGTCTGG
isotig01295	p4	(ATTT)3	4	12	1141	1152	F1-01295	25	59.30	56.00	204	CCCACGATGTCGCTATGTCGTACAG
							R1-01295	25	57.31	48.00		CGCCGGCTACTCAATCCATAATTCA
isotig01506	p4	(ATTT)3	4	12	1	12
isotig01984	p4	(ATTT)3	4	12	1827	1838
isotig02008	p4	(ATTT)3	4	12	3707	3718
isotig02302	p4	(ATTT)3	4	12	11	22
isotig02302	p4	(ATTT)3	4	12	2320	2331
isotig02365	p4	(ATTT)3	4	12	2014	2025	F1-02365	23	57.96	52.17	165	TGCAACGTTGGAGACTGAGACCT
							R1-02365	23	57.32	47.83		TGGCTCGACGAATGAAACAGCTT
isotig02393	p4	(ATTT)3	4	12	2065	2076	F1-02393	23	57.36	52.17	197	TCCACTGGTCAAGCTCCTTGAGT
							R1-02393	20	59.04	60.00		TTGTGTTGGGTGGGCAGGCA
isotig02887	p4	(ATTT)3	4	12	1677	1688	F1-02887	24	57.76	50.00	173	TGACAGTGAACGTCACTCCAGACA
							R1-02887	24	57.51	50.00		TCAAAGGTCTCCCCAAACTTGTGC
isotig03185	p4	(ATTT)3	4	12	614	625	F1-03185	22	57.53	59.09	232	CGGCATTACGAGAGACACGGAC
							R1-03185	23	57.08	56.52		CTCGTTTCGATCGTCTCCTGGTC
isotig03422	p4	(ATTT)3	4	12	930	941	F1-03422	22	58.34	54.54	239	TCTGAGCAGTTGCATCCGACGA
							R1-03422	24	57.43	50.00		TGAGTCTGCTGGAATGTTCTGCAC
isotig03469	p4	(ATTT)3	4	12	456	467
isotig04371	p4	(ATTT)3	4	12	222	233	F1-04371	24	57.74	50.00	246	TGACTCAGACTCCGTTTTGGTGGA
							R1-04371	21	58.82	61.90		AGGCCTCGGATGTCTCGGACT
isotig05225	p4	(ATTT)3	4	12	675	686	F1-05225	23	59.12	52.17	219	TGGGATCGCCTGCAATTTTCCCA
							R1-05225	24	57.02	50.00		TGAAGGGCTGGAGAATTAGGTGGA
isotig05257	p4	(ATTT)3	4	12	6	17
isotig05502	p4	(ATTT)3	4	12	679	690	F1-05502	25	57.92	48.00	259	TCCGGGTTCAAGGGATTCATTCAGT
							R1-05502	23	57.36	52.17		TCCGACGAATCTACCTTCGGTGT
isotig05657	p4	(ATTT)3	4	12	691	702	F1-05657	20	58.51	65.00	246	ACGTCCAGAGTCCCCCAGGT
							R1-05657	20	58.97	65.00		GGGGCCTTGCATGGGTCAGT
isotig05787	p4	(ATTT)3	4	12	658	669
isotig06306	p4	(ATTT)3	4	12	678	689
isotig06723	p4	(ATTT)3	4	12	1	12
isotig07125	p4	(ATTT)3	4	12	573	584	F1-07125	24	58.71	54.17	189	AGCTTCTCAAAGACCTCCTTCGCC
							R1-07125	25	57.96	48.00		AGTGGATAAGAACGTGTTCGGTGGA
isotig07155	p4	(ATTT)3	4	12	227	238	F1-07155	22	57.19	54.54	244	ACAGCTCTGGCTAATCGACCCT
							R1-07155	20	59.70	65.00		GGTCGCGCTCCCATTGTGGT
isotig08086	p4	(ATTT)3	4	12	135	146	F1-08086	22	58.78	54.54	249	TGCTTACACGTGCTCCGTTCCA
							R1-08086	25	57.84	52.00		GGTGGCAGTTAAGTACGACTTGTGG
isotig08111	p4	(ATTT)3	4	12	96	107
isotig04235	p4	(ATTT)4	4	16	1033	1048	F1-04235	21	59.17	57.14	181	ACCCAACACTGGCGAACAGCA
							R1-04235	26	58.74	50.00		ACAGGGTATCTTCCTGTCACTCGTCA
isotig04271	p4	(ATTT)4	4	16	47	62	F1-04271	22	58.98	59.09	204	CGATCGAAAGCCTTCGGTGGGA
							R1-04271	20	59.26	60.00		TGGTTTGCTGCCTCCGGCAT
isotig02362	p4	(ATTT)6	4	24	294	317	F1-02362	20	58.55	60.00	204	TGTGTGAGCATCGCAACGCC
							R1-02362	22	58.98	59.09		TCCAGGTGCCCTGGGAGATTCA
isotig02288	p4	(CAAT)3	4	12	2314	2325
isotig03600	p4	(CAAT)3	4	12	173	184
isotig07316	p4	(CACT)3	4	12	55	66	F1-07316	26	57.27	42.31	144	TTTGGCCGTTTTGTAATCTGTGGAGA
							R1-07316	21	59.07	66.67		AGGGATGAGGAAGGACGGGGG
isotig03941	p4	(CAGC)3	4	12	444	455	F1-03941	21	58.86	57.14	252	ACGGCGAACTTACGGATGCCA
							R1-03941	20	60.11	65.00		CATGGGCGCATCCTTCCGCA
isotig00994	p4	(CAGT)3	4	12	2066	2077	F1-00994	27	57.38	40.74	183	TCTGCAAAATTCGCTGGATAAAAACCG
							R1-00994	20	59.06	65.00		TAGCCAACCGCTTGCTCCCC
isotig00995	p4	(CAGT)3	4	12	2013	2024
isotig07816	p4	(CATA)3	4	12	171	182	F1-07816	20	59.77	65.00	280	GCCATCCCGTCGCAGTCGTT
							R1-07816	27	57.59	44.44		TGAGTTTAGCACTATACACGCACACAC
isotig03836	p4	(CATC)4	4	16	43	58	F1-03836	21	59.57	61.90	262	ACCAGTGCTGCTCTCTCGGGT
							R1-03836	22	59.79	63.64		ACCGGCGATAGGTGTACCCAGG
isotig02247	p4	(CATT)3	4	12	221	232	F1-02247	20	59.78	65.00	258	CGCGCACGCTCTGTCTCTGT
							R1-02247	22	57.79	54.54		TCGTCTCGTGCAGACGTCTCTT
isotig04140	p4	(CATT)3	4	12	433	444	F1-04140	24	58.04	54.17	204	TGAGGATCCGGATGAAGAGCTTGG
							R1-04140	20	60.04	70.00		GGCCCATCCACGCCAGTGTC
isotig04015	p4	(CCAA)3	4	12	862	873	F1-04015	20	60.25	70.00	204	CCGCGATACCCAGTGCGAGC
							R1-04015	22	58.19	54.54		TGCTTGGGTCTCAAGTCGCTCA
isotig08194	p4	(CCAA)3	4	12	271	282	F1-08194	26	57.15	42.31	150	ACTCCAACCATTTTGTGAATCAACGC
							R1-08194	26	57.06	38.46		TTGCAATTTGCCACCATCACATGAAA
isotig03869	p4	(CCTC)3	4	12	611	622	F1-03869	20	59.62	65.00	164	CAGTGGTGGCAGCAGCCCAT
							R1-03869	21	59.57	61.90		TGCACTGGTGGAGGAGCGAGA
isotig00830	p4	(CGAG)3	4	12	7950	7961
isotig02675	p4	(CGAT)3	4	12	947	958	F1-02675	20	59.61	65.00	198	AGCCCCTCCACTGGCGATGA
							R1-02675	20	60.25	70.00		GGGTGCCCGACGACCAACAC
isotig02859	p4	(CGAT)3	4	12	1495	1506	F1-02859	20	59.97	70.00	215	TCAGCGGGGAGGGAGACTGC
							R1-02859	20	60.04	65.00		CCGGCTCGTAAAGCACCGCA
isotig03518	p4	(CGAT)3	4	12	603	614	F1-03518	20	59.42	65.00	193	CCAGGGAACATCGGCAGCGT
							R1-03518	21	59.01	61.90		TCGGGAGATGGTGGAGTGCCT
isotig02247	p4	(CGTT)3	4	12	2431	2442
isotig06139	p4	(CTGA)3	4	12	669	680	F1-06139	21	60.31	66.67	167	GGCCACTCGGTCGCCTAGTCA
							R1-06139	25	57.32	48.00		AACTTGTAGGAACAGCACGCTACAG
isotig03164	p4	(CTTC)3	4	12	692	703
isotig03483	p4	(CTTC)3	4	12	625	636	F1-03483	21	59.02	61.90	206	CAAGGGCAGGCCCTGGATTGT
							R1-03483	20	60.04	65.00		CATCATGGGCGGCAGGCACA
isotig02304	p4	(CTTG)3	4	12	1175	1186	F1-02304	20	60.32	65.00	177	GCTGCTGCTGACGAGGCGTT
							R1-02304	21	57.02	57.14		TCAGGAGATCGCACGGATTGC
isotig00978	p4	(CTTT)3	4	12	2912	2923	F1-00978	20	58.68	65.00	261	TCGACCGTCCCAGGATCCCA
							R1-00978	25	57.91	48.00		ACTTGATGATCGACAATATCGCGCC
isotig06117	p4	(CTTT)3	4	12	72	83	F1-06117	24	57.07	50.00	119	TCATCCGTATATGCTCTGCCCTGA
							R1-06117	20	59.77	65.00		AGTGAATCGCAGCTGCCCCG
isotig07524	p4	(CTTT)3	4	12	384	395	F1-07524	22	59.52	59.09	238	TCCCCAACATGCAGTCCTCCCA
							R1-07524	21	58.96	61.90		ACCCGGTGACACTCTCTCGGT
isotig04297	p4	(GAAA)3	4	12	1064	1075
isotig04410	p4	(GAAA)3	4	12	921	932	F1-04410	20	59.97	70.00	180	GAGCCCGTCGAGGGGAAGGT
							R1-04410	23	58.94	56.52		TCCCGATCTACAGACGCAGGTCA
isotig02044	p4	(GAAC)3	4	12	3031	3042	F1-02044	24	57.25	45.83	263	AGTGGTGCTGTATTTGCCAAGGTT
							R1-02044	23	57.38	52.17		CATTGTGCTTGGCTCCGTAGTGA
isotig04242	p4	(GAAT)3	4	12	422	433	F1-04242	23	58.29	52.17	174	TGTAGTTGTGCCGACCTTCGTGA
							R1-04242	20	59.97	70.00		CCGCTGACCCCGGAGGAAGA
isotig00890	p4	(GACA)3	4	12	1611	1622
isotig00891	p4	(GACA)3	4	12	1611	1622
isotig07799	p4	(GACC)3	4	12	152	163	F1-07799	20	60.32	70.00	159	CGACGGCCCCGACCCTAGTT
							R1-07799	20	60.11	70.00		CCGTTCCGGTCGTCGGTTCG
isotig07440	p4	(GACT)3	4	12	569	580
isotig02848	p4	(GAGG)3	4	12	1226	1237	F1-02848	20	58.53	65.00	287	ACCTCTCGTGAGGAGCACGC
							R1-02848	20	59.67	70.00		ATTCCCGGAGGGCTGGAGGG
isotig07029	p4	(GAGG)3	4	12	424	435	F1-07029	20	59.63	60.00	226	ACAAACCGTCGCATCCGGCA
							R1-07029	26	57.82	42.31		ACATGGGCGTTGACATCACAATTTCT
isotig03202	p4	(GATT)3	4	12	956	967	F1-03202	20	60.25	65.00	201	AGCAGCTTGGACGGCAGCAC
							R1-03202	20	57.28	60.00		AGCACCATGGACCCTGTGGA
isotig03609	p4	(GATT)3	4	12	82	93	F1-03609	20	59.84	70.00	229	GCGTGATGCGGGGGAGTGAG
							R1-03609	20	58.56	60.00		TCGGTGCACCCTGCAGAACA
isotig05974	p4	(GATT)3	4	12	23	34
isotig07131	p4	(GCAC)3	4	12	128	139	F1-07131	20	59.51	65.00	175	GAGCGGGCGTTGAAAGCAGC
							R1-07131	20	60.32	70.00		CCAAGCCTCACCGGGCGAAC
isotig04674	p4	(GGCT)3	4	12	423	434	F1-04674	21	59.84	61.90	171	TCCACCCGAGCTGCTGGAACT
							R1-04674	21	58.94	61.90		ACCAGAGACTCGGGGCCTGAA
isotig06332	p4	(GTCA)3	4	12	51	62	F1-06332	21	59.45	61.90	192	ACGGCAAATCCACGTAGGCCC
							R1-06332	20	59.48	60.00		TGGGTGCAGCAACAGCACGA
isotig00493	p4	(GTCC)3	4	12	2319	2330	F1-00493	20	60.46	65.00	190	TGCTCAGGCTGCCACGACCT
							R1-00493	23	57.03	47.83		ATGTGGCATTGAGCTGAGAAGCA
isotig00495	p4	(GTCC)3	4	12	1263	1274	F1-00495	20	60.46	65.00	190	TGCTCAGGCTGCCACGACCT
							R1-00495	23	57.03	47.83		ATGTGGCATTGAGCTGAGAAGCA
isotig07271	p4	(GTCC)3	4	12	385	396	F1-07271	20	59.42	60.00	206	TAAGCGCTCGCCATTGGGCA
							R1-07271	20	59.28	65.00		ACGGCGTCTTGGACCCCAAC
isotig01258	p4	(GTGG)3	4	12	1277	1288	F1-01258	20	58.98	65.00	162	GAAGCCGCCCAGGTTGGAGT
							R1-01258	20	59.70	65.00		CGGTGATCACGTGGCGGTGT
isotig02405	p4	(GTGG)3	4	12	544	555	F1-02405	21	59.98	61.90	221	AGCCGACGAGCGAGGAACTCA
							R1-02405	21	59.91	61.90		TCGTCGGGTGTGACGGGACAT
isotig01198	p4	(GTTA)3	4	12	405	416	F1-01198	20	57.55	55.00	249	AAAACCGCTCGGCGGTCAAT
							R1-01198	23	59.32	52.17		ACGTGCTGGGTGTCATCAGCAAA
isotig01199	p4	(GTTA)3	4	12	405	416	F1-01199	20	57.55	55.00	249	AAAACCGCTCGGCGGTCAAT
							R1-01199	23	59.32	52.17		ACGTGCTGGGTGTCATCAGCAAA
isotig02142	p4	(GTTT)3	4	12	82	93	F1-02142	22	58.17	54.54	224	ACGATACTCGTACACGCTGCCA
							R1-02142	20	59.75	65.00		TGGAGGGCGGTTGTCCAGGT
isotig02264	p4	(GTTT)3	4	12	71	82
isotig05917	p4	(GTTT)3	4	12	514	525	F1-05917	22	59.49	54.54	298	TGCAATCGCGACACGTACTGCT
							R1-05917	20	59.98	65.00		ACGGCTCTCAAACGCCACGG
isotig01099	p4	(TAAA)3	4	12	392	403	F1-01099	24	57.73	50.00	196	TGGCAGTTAGTGCGGAAACAGATG
							R1-01099	22	58.55	54.54		TGCGAAACTGCCACTTCACTGC
isotig01993	p4	(TAAA)3	4	12	3055	3066	F1-01993	27	57.18	40.74	288	AGTGCGCAATACCCATAACGAATTACT
							R1-01993	22	57.80	54.54		AGGCACTTTTCGACACGAGCTG
isotig02266	p4	(TAAA)3	4	12	2083	2094	F1-02266	21	57.26	57.14	209	ACCCACCCCTCCAGACACAAA
							R1-02266	24	57.62	45.83		ACACCGTTTGATCACGAAAACCGA
isotig02644	p4	(TAAA)3	4	12	8	19
isotig02808	p4	(TAAA)3	4	12	1486	1497	F1-02808	25	58.33	48.00	198	CGATTGCTTGTCATTCTGCCACTGT
							R1-02808	23	57.22	52.17		TGGTCTCGGTAACGAGTGGTCTT
isotig03236	p4	(TAAA)3	4	12	136	147	F1-03236	27	58.26	44.44	218	GGATCACATGAACATCGTTCAACAGCA
							R1-03236	20	60.31	65.00		GCTCGCCAAGAACGCCGACA
isotig03387	p4	(TAAA)3	4	12	432	443	F1-03387	26	57.93	46.15	233	TCTAGCGCACCTCTGTTCATTGATCT
							R1-03387	20	59.97	65.00		TGGCGCAGCTCTTGCCCTTC
isotig03448	p4	(TAAA)3	4	12	1227	1238	F1-03448	20	59.89	65.00	198	ACAGCCCCTCCCCTTCGCAT
							R1-03448	21	59.21	61.90		GGCAGCAGTTCCTTTCGCACG
isotig04551	p4	(TAAA)3	4	12	733	744
isotig04588	p4	(TAAA)3	4	12	537	548
isotig04731	p4	(TAAA)3	4	12	751	762
isotig08027	p4	(TAAA)4	4	16	450	465	F1-08027	26	58.33	46.15	160	ACGCCAGGTTTTCCTGTAATTTCTGC
							R1-08027	22	59.61	59.09		TGCAACTCCCACTGCCTTCACG
isotig02279	p4	(TAAG)3	4	12	667	678	F1-02279	21	59.98	66.67	202	GGTGACGACGAGGTCGAGGGT
							R1-02279	20	61.24	70.00		GGCGCCATCTGCCTCCCCTT
isotig00568	p4	(TAAT)3	4	12	1704	1715	F1-00568	26	59.57	50.00	291	TGCGACTATCTCTGGAACGATTGGGT
							R1-00568	27	57.12	37.04		ATGGTGCTTGCTGTTGTTTCATTTCAA
isotig00569	p4	(TAAT)3	4	12	1503	1514	F1-00569	26	59.57	50.00	291	TGCGACTATCTCTGGAACGATTGGGT
							R1-00569	27	57.12	37.04		ATGGTGCTTGCTGTTGTTTCATTTCAA
isotig00860	p4	(TAAT)3	4	12	110	121							--
isotig00861	p4	(TAAT)3	4	12	110	121
isotig01605	p4	(TAAT)3	4	12	720	731
isotig02001	p4	(TAAT)3	4	12	3900	3911
isotig02025	p4	(TAAT)3	4	12	3105	3116	F1-02025	27	57.08	40.74	176	ATGTAATGTTGCGCTTGTACAGAGACT
							R1-02025	22	58.33	54.54		GGCCGTTGATGCATGAAACCCA
isotig02377	p4	(TAAT)3	4	12	859	870	F1-02377	24	59.22	54.17	102	ACCCTTCGTAGCATAGTGGCCTCA
							R1-02377	22	58.08	54.54		TCTGCCTGTTTCTGGGCTTCCA
isotig02561	p4	(TAAT)3	4	12	184	195	F1-02561	20	58.01	60.00	167	TGCTGGCTCGAGTGTGTGGA
							R1-02561	23	58.37	52.17		TCACGACCGAAGAAGACTTGCGA
isotig02798	p4	(TAAT)3	4	12	1466	1477	F1-02798	27	58.49	48.15	255	CCCTGGATTGAGAGAATACTTGACGCA
							R1-02798	23	59.36	56.52		CCATTTTGCCCCATTGTCCCCCT
isotig02813	p4	(TAAT)3	4	12	451	462	F1-02813	27	57.39	44.44	171	AGTTACGAGTAGCTTAGAGGCGATTCA
							R1-02813	20	57.34	55.00		ACAGCATTGGCATCGAGCGT
isotig02825	p4	(TAAT)3	4	12	810	821
isotig02848	p4	(TAAT)3	4	12	602	613
isotig02928	p4	(TAAT)3	4	12	638	649
isotig03783	p4	(TAAT)3	4	12	156	167	F1-03783	21	57.80	57.14	262	ACAAACGGGCAGAGGCCTAGT
							R1-03783	20	59.90	65.00		GCCTTCAACGGCGGGTGTCA
isotig04005	p4	(TAAT)3	4	12	25	36
isotig04078	p4	(TAAT)3	4	12	1074	1085	F1-04078	27	57.35	44.44	246	AGGCGTGTCATCATCTATAAGTCTGGT
							R1-04078	26	57.07	46.15		TGTCAATGATCCGCTGAATTCTCCTC
isotig04386	p4	(TAAT)3	4	12	554	565
isotig04394	p4	(TAAT)3	4	12	988	999	F1-04394	20	58.80	60.00	173	TGGATGACGCAACCGCGAGA
							R1-04394	20	59.84	65.00		GTGCGACGCCGGGCTGATAA
isotig04835	p4	(TAAT)3	4	12	809	820
isotig04953	p4	(TAAT)3	4	12	567	578	F1-04953	27	59.25	51.85	140	GCCACGAGTTACTTAGGTACAAGAGCG
							R1-04953	27	59.75	48.15		TGGTAGTTGGCGCATAAAGTCTCTCCA
isotig05944	p4	(TAAT)3	4	12	594	605	F1-05944	21	57.58	52.38	259	TGTTTGCCCTTTCGGCGATGT
							R1-05944	20	60.04	70.00		CTTCGGGCCCAGCTTCTGCC
isotig06672	p4	(TAAT)3	4	12	43	54
isotig06742	p4	(TAAT)3	4	12	117	128	F1-06742	24	58.54	50.00	194	TCGGCGGACGTAATTAAGGCAGAA
							R1-06741	23	58.65	52.17		TGCCGACAGTTGTAGAGCTGCAT
isotig07621	p4	(TAAT)3	4	12	280	291	F1-07621	22	58.58	54.54	228	TCATGCAACGCGGTAACTCCCT
							R1-07621	25	57.22	44.00		TTGATCTGGCCACAATCGTTCTTGT
isotig03039	p4	(TAAT)4	4	16	559	574	F1-03039	23	58.56	56.52	237	ACGCAGTATCGACTCCTGTCACG
							R1-03039	24	60.17	62.50		GGACCTCTCGGGGTGTTATAGCCG
isotig03105	p4	(TAAT)4	4	16	145	160
isotig02053	p4	(TACA)3	4	12	210	221	F1-02053	27	57.02	40.74	270	AACCAATGACGACTAGTTCAATTCCGT
							R1-02053	21	59.11	66.67		CGTGGGGAAGTCAAGGGGAGC
isotig01538	p4	(TATC)3	4	12	793	804
isotig00828	p4	(TATG)3	4	12	18	29
isotig04248	p4	(TATG)3	4	12	1078	1089	F1-04248	22	59.74	54.54	208	TGCGCTATGCGCACCTCAAAGT
							R1-04248	26	57.82	46.15		TGCAATTCTCTTCGAGACCTACCACA
isotig07906	p4	(TATG)3	4	12	371	382	F1-07906	22	57.76	54.54	214	ACGTAAGCGAGGAGTCAGCAGT
							R1-07906	20	57.86	60.00		ACGCCTAGCTACCGCAACCT
isotig00556	p4	(TATT)3	4	12	13	24
isotig00557	p4	(TATT)3	4	12	13	24
isotig00558	p4	(TATT)3	4	12	5	16
isotig01086	p4	(TATT)3	4	12	11	22
isotig01396	p4	(TATT)3	4	12	936	947	F1-01396	20	58.69	70.00	272	CCCGAGAGACTCGACAGCCG
							R1-01396	20	60.18	65.00		CGCGCGCGACTAAGACGTGA
isotig02038	p4	(TATT)3	4	12	3100	3111
isotig02285	p4	(TATT)3	4	12	2238	2249	F1-02285	21	59.43	66.67	297	GGGGCCCTGGTATCACTCGGA
							R1-02285	22	57.15	54.54		AGGTACAACACACAGGGGGACA
isotig02600	p4	(TATT)3	4	12	1779	1790
isotig02667	p4	(TATT)3	4	12	20	31
isotig02687	p4	(TATT)3	4	12	12	23
isotig03139	p4	(TATT)3	4	12	17	28
isotig07159	p4	(TATT)3	4	12	203	214	F1-07159	22	59.63	59.09	119	GCAATCCGCGTGCTTCTCAACG
							R1-07159	20	60.18	65.00		CCCGCGGTGACACAGGCAAA
isotig07613	p4	(TATT)3	4	12	125	136	F1-07613	27	57.74	44.44	172	TCAGTGAATTCATCATATGGCGTCGTG
							R1-07613	22	58.48	50.00		ACACTTTTTGCGCGTTGAGGCT
isotig00050	p4	(TATT)4	4	16	2465	2480
isotig04628	p4	(TATT)4	4	16	23	38
isotig07766	p4	(TATT)4	4	16	20	35
isotig01581	p4	(TCAA)3	4	12	175	186	F1-01581	20	60.18	65.00	186	TGCTGCCCGGCTGGAACAAC
							R1-01581	20	59.63	70.00		CGGGTCACCAACCCGACACC
isotig02107	p4	(TCAA)3	4	12	822	833	F1-02107	21	59.32	57.14	252	TCGTTGCACACGAGTGCCCAT
							R1-02107	20	59.63	65.00		GCCGCTTGGACTGAGGCACA
isotig03185	p4	(TCAA)3	4	12	495	506
isotig04053	p4	(TCAA)3	4	12	109	120
isotig01084	p4	(TCAC)3	4	12	2135	2146
isotig01085	p4	(TCAC)3	4	12	877	888	F1-01085	20	59.61	70.00	268	TGGGCTCCTCACCCTCGTCC
							R1-01085	23	58.07	52.17		GCCAGAACGTGAGACAAGCAACA
isotig04100	p4	(TCAC)3	4	12	276	287	F1-04100	24	57.71	50.00	237	TCGAAATCTCGCAACGATGTAGCC
							R1-04100	20	59.91	60.00		ACCGAACGCGCGCGGATAAT
isotig04591	p4	(TCAC)3	4	12	645	656	F1-04591	19	60.40	73.68	167	CTTGAGCTCCGGCGCACCC
							R1-04591	23	57.61	52.17		ACAGCTGGACTGAGGGACTTTGT
isotig08293	p4	(TCAC)3	4	12	372	383
isotig00906	p4	(TCAG)3	4	12	1962	1973
isotig00907	p4	(TCAG)3	4	12	1479	1490
isotig03289	p4	(TCAG)3	4	12	787	798	F1-03289	20	60.25	70.00	270	CGTTCGGGGTGGCCCAACTG
							R1-03289	21	58.95	61.90		AGCTCCAGGTGAGGACGGTCA
isotig02860	p4	(TCAT)3	4	12	1239	1250	F1-02860	21	59.06	61.90	194	AGGGTCCTGTGACAACCCCCA
							R1-02860	21	58.80	57.14		TCCTGCGTGCAAATGGTGTGC
isotig05932	p4	(TCAT)4	4	16	155	170
isotig04210	p4	(TCAT)7	4	28	1070	1097
isotig03023	p4	(TCCA)3	4	12	243	254	F1-03023	21	59.52	66.67	177	GGTCCGCTGCTCAAGGCTACC
							R1-03023	20	60.11	75.00		GGAGATGAGGGGCGAGGGGG
isotig05573	p4	(TCCA)3	4	12	166	177	F1-05573	21	59.85	66.67	200	GGCCAGCTCCAGCATCTCAGC
							R1-05573	20	60.25	70.00		AGCCCTCGGTTCAGGCCCTC
isotig05872	p4	(TCCA)3	4	12	398	409	F1-05872	20	59.26	65.00	214	GCCAGCCCTGGCAAAGTCCT
							R1-05872	21	59.46	66.67		GGAGCAGTGGTCAGGCAGTCG
isotig00717	p4	(TCCC)3	4	12	1579	1590	F1-00717	26	58.40	46.15	205	ACGCCATAATTCTCGTGTTGGTTTGG
							R1-00717	22	58.58	59.09		CCACGTGCACCTGTCATACCCT
isotig00718	p4	(TCCC)3	4	12	1561	1572	F1-00718	26	58.40	46.15	205	ACGCCATAATTCTCGTGTTGGTTTGG
							R1-00718	22	58.58	59.09		CCACGTGCACCTGTCATACCCT
isotig01908	p4	(TCCC)3	4	12	22	33
isotig05503	p4	(TCCC)3	4	12	37	48	F1-05503	21	60.05	61.90	107	ACCGCGACATCGCTCTCTCCA
							R1-05503	20	59.61	65.00		AGACTCGCTGCTGGAGCCCT
isotig02664	p4	(TCCT)3	4	12	786	797	F1-02664	20	57.77	60.00	202	ACTGCCATCCTCAGGCACGA
							R1-02664	22	57.82	54.54		ACTGGAGAAAGCCCTGGCTGAA
isotig05389	p4	(TCCT)3	4	12	480	491	F1-05389	25	58.10	48.00	215	ACCGACAAGTAATTTGGGAGTGGGT
							R1-05389	21	59.78	57.14		TGAAAAGTGCTGGCACGGGCA
isotig02896	p4	(TCGA)3	4	12	195	206	F1-02896	20	59.90	65.00	200	AGGCGAGAGCGTGTGGGACT
							R1-02896	23	57.16	47.83		TGCTGATGTAATGCGAATGCCCT
isotig02098	p4	(TCGT)3	4	12	2880	2891
isotig01168	p4	(TCTG)3	4	12	1338	1349	F1-01168	20	59.19	60.00	204	TCCACCGCCTTTTGCAGGCT
							R1-01168	20	60.04	65.00		AGCCACAGTCGTTCGCGCTC
isotig01169	p4	(TCTG)3	4	12	703	714	F1-01169	20	59.08	65.00	201	CCCACCTCGTCAGCGCTTCA
							R1-01169	20	59.34	65.00		TCGCAGGAGGTCTCGCTCCA
isotig05975	p4	(TGAA)3	4	12	146	157
isotig05809	p4	(TGAA)4	4	16	18	33
isotig07928	p4	(TGAC)3	4	12	70	81
isotig04925	p4	(TGAT)3	4	12	851	862	F1-04925	20	58.88	65.00	185	ACGCGACGTCAGGGTGATCC
							R1-04925	20	60.18	60.00		TTTTCGCTGCGGCACGTGGA
isotig02178	p4	(TGCA)3	4	12	1028	1039	F1-02178	21	57.03	52.38	248	TGTCGTGTACGCTTGCTGTGT
							R1-02178	22	57.49	54.54		ACCGCATAAGTCGGCATTCTCG
isotig00966	p4	(TGGA)3	4	12	1804	1815	F1-00966	22	59.67	59.09	189	GCTGATGCTGGAGCACAACCCA
							R1-00966	20	59.42	65.00		TCGGTTGAACCCATCCGGCG
isotig02342	p4	(TGGA)3	4	12	1971	1982	F1-02342	20	59.97	65.00	222	TGGTGAACGCCGGGGAATGC
							R1-02342	20	60.11	65.00		TGCCTCCAAGGCAGAGCCCA
isotig05130	p4	(TGGA)3	4	12	280	291	F1-05130	20	59.70	70.00	199	CGTCCGACAAGCACCCCTGG
							R1-05130	20	60.18	65.00		TGGCCGGTTGCGAACTGGTG
isotig00934	p4	(TGGC)3	4	12	1376	1387	F1-00934	21	59.92	61.90	230	TCGCTGGTGAACTGCCAGCAC
							R1-00934	20	60.38	65.00		GCCAGCAGCTCGCGATGGTT
isotig00935	p4	(TGGC)3	4	12	651	662	F1-00935	21	59.92	61.90	230	TCGCTGGTGAACTGCCAGCAC
							R1-00935	20	60.38	65.00		GCCAGCAGCTCGCGATGGTT
isotig00711	p4	(TGTA)3	4	12	1761	1772	F1-00711	20	59.49	65.00	190	TATGTGGCTCCAAGCGCCCG
							R1-00711	20	60.32	65.00		TCCCTTTGGCGTAACGCGGC
isotig00712	p4	(TGTA)3	4	12	1761	1772	F1-00712	20	59.49	65.00	190	TATGTGGCTCCAAGCGCCCG
							R1-00712	20	60.32	65.00		TCCCTTTGGCGTAACGCGGC
isotig05810	p4	(TGTA)4	4	16	193	208
isotig03223	p4	(TGTC)3	4	12	941	952	F1-03223	25	57.40	48.00	201	TCGTGATACAAGGGGTACCCAACTT
							R1-03223	20	59.97	70.00		TCTGGCTGGAGTCCCCTCGC
isotig07967	p4	(TGTC)3	4	12	275	286	F1-07967	20	58.47	60.00	216	TGGCCAAGTGGCAGACCACA
							R1-07967	20	59.15	65.00		CGTGACCTCGATGGTGGCGT
isotig00834	p4	(TGTT)3	4	12	6461	6472	F1-00834	23	57.40	52.17	282	TGGAGATGCAGGAACTTGGAGGT
							R1-00834	27	57.01	40.74		TCGGGAACGAACAACCATTTATTACCA
isotig02248	p4	(TGTT)3	4	12	391	402
isotig01109	p4	(TTAA)3	4	12	1430	1441
isotig01186	p4	(TTAA)3	4	12	173	184	F1-01186	21	57.83	52.38	263	TCGCGCTTCATTTCCGCATCA
							R1-01186	23	60.12	60.87		GCAGCAGTTGGACGAGTATGGGC
isotig01187	p4	(TTAA)3	4	12	173	184	F1-01187	21	57.83	52.38	263	TCGCGCTTCATTTCCGCATCA
							R1-01187	23	60.12	60.87		GCAGCAGTTGGACGAGTATGGGC
isotig02177	p4	(TTAA)3	4	12	233	244	F1-02177	22	58.19	54.54	191	TGACAGGTCGTTTTCTCCCGCT
							R1-02177	24	59.81	58.33		ACCTCCAGGGTGGAACTCAACAGG
isotig02238	p4	(TTAA)3	4	12	1564	1575
isotig02250	p4	(TTAA)3	4	12	644	655
isotig02316	p4	(TTAA)3	4	12	540	551	F1-02316	24	59.26	54.17	209	ACCCAGATCACCCCCACTTTTCCT
							R1-02316	22	58.80	59.09		TGGATGGCCTGTACCGAGTCCT
isotig02452	p4	(TTAA)3	4	12	2	13
isotig02691	p4	(TTAA)3	4	12	220	231	F1-02691	23	59.38	52.17	233	TGCAGCGACTGGAAGATTGCACA
							R1-02691	26	57.61	42.31		AGCAGCAGAACAGCAAGAATTCATCA
isotig03310	p4	(TTAA)3	4	12	1227	1238
isotig03393	p4	(TTAA)3	4	12	207	218	F1-03393	24	57.91	50.00	210	TGGATGGGAGTGCGAAGAATCAGT
							R1-03393	20	59.62	60.00		AGCGGCGTCAATGGTGCCTT
isotig03798	p4	(TTAA)3	4	12	4	15
isotig03893	p4	(TTAA)3	4	12	1192	1203
isotig04312	p4	(TTAA)3	4	12	9	20
isotig04639	p4	(TTAA)3	4	12	52	63	F1-04639	27	58.53	40.74	262	TGCCATCAAAATTGGTTGCATTGAGGT
							R1-04639	21	60.05	66.67		GCAGGACCACACGAGACTGCG
isotig06425	p4	(TTAA)3	4	12	57	68	F1-06425	20	59.77	65.00	205	CCCGCAGTCAATCGCCACGA
							R1-06425	20	59.90	65.00		GCAGCTCCACCCGGGCTTTT
isotig06683	p4	(TTAA)3	4	12	616	627
isotig07941	p4	(TTAA)3	4	12	20	31
isotig04186	p4	(TTAA)4	4	16	1046	1061
isotig06727	p4	(TTAC)3	4	12	3	14
isotig02651	p4	(TTAC)4	4	16	585	600	F1-02651	26	60.23	50.00	175	GCATGCGCAGATGCACATACTCATCA
							R1-02651	22	59.49	59.09		ACGCGAGGTACTACGACACCGA
isotig00316	p4	(TTAT)3	4	12	4876	4887	F1-00316	20	59.84	65.00	251	CCGCGTCGGTCACCGCATTA
							R1-00316	20	60.04	60.00		TTCGTCGCGTCGCCTGCATT
isotig00317	p4	(TTAT)3	4	12	4689	4700	F1-00317	20	59.84	65.00	251	CCGCGTCGGTCACCGCATTA
							R1-00317	20	60.04	60.00		TTCGTCGCGTCGCCTGCATT
isotig00481	p4	(TTAT)3	4	12	3495	3506
isotig00483	p4	(TTAT)3	4	12	1760	1771
isotig01212	p4	(TTAT)3	4	12	448	459	F1-01212	21	57.82	57.14	199	TCCACTGTGGCTAGCACCGAA
							R1-01212	21	59.39	61.90		TGTGCCCGTTCTTCTCGCCTG
isotig01213	p4	(TTAT)3	4	12	448	459	F1-01213	21	57.82	57.14	199	TCCACTGTGGCTAGCACCGAA
							R1-01213	21	59.39	61.90		TGTGCCCGTTCTTCTCGCCTG
isotig01296	p4	(TTAT)3	4	12	1303	1314	F1-01296	22	57.08	50.00	240	AGTGCCATTCTCCGCAGGTTTT
							R1-01296	20	58.76	65.00		TCGCCTCTACCTCGGCTCCA
isotig02034	p4	(TTAT)3	4	12	3282	3293	F1-02034	20	60.65	70.00	250	CTCGCGACGCCCCCTGTTTG
							R1-02034	23	58.40	52.17		ACGGATCCCCAACAATCGTCGAA
isotig02167	p4	(TTAT)3	4	12	615	626	F1-02167	20	59.24	70.00	203	CCCCTCGACCCTCCCAAGGT
							R1-02167	20	57.11	60.00		TGCCCAGAGTCGTCATGGGA
isotig03092	p4	(TTAT)3	4	12	1553	1564
isotig03137	p4	(TTAT)3	4	12	1448	1459	F1-03137	25	59.51	56.00	232	GGAGATCGTGATTACGGTGAAGGCG
							R1-03137	22	58.07	54.54		ACTCCATCCATCGTGTCAGCGT
isotig03514	p4	(TTAT)3	4	12	421	432	F1-03514	20	59.08	60.00	211	TAAAGTGAGGCGGCGCACGA
							R1-03514	24	58.46	54.17		TGGGAGAGATGTGTTTAGCGTGGG
isotig03677	p4	(TTAT)3	4	12	689	700	F1-03677	27	57.44	40.74	199	TCACGTGTCGTCGGAATTTATCGATTT
							R1-03677	22	58.68	54.54		TCGGTGACGAAATCAGCGACGA
isotig04051	p4	(TTAT)3	4	12	1152	1163
isotig05979	p4	(TTAT)3	4	12	720	731
isotig06098	p4	(TTAT)3	4	12	259	270	F1-06098	22	59.32	59.09	295	TGGCTCCGTACACATTCCCCCT
							R1-06098	25	57.17	48.00		AGCTAGTAGCCGATAAACACGAGGA
isotig07253	p4	(TTAT)3	4	12	398	409	F1-07253	23	59.13	60.87	207	GCCTGATTAGGCCATAGGGTGGC
							R1-07253	20	59.98	65.00		CGACACCGTTGACCGCGTGA
isotig02627	p4	(TTAT)4	4	16	1304	1319
isotig02979	p4	(TTAT)4	4	16	64	79
isotig06363	p4	(TTAT)4	4	16	23	38
isotig01105	p4	(TTAT)5	4	20	276	295	F1-01105	20	59.90	70.00	238	GGGTCATCCCAGATGCGCGG
							R1-01105	20	59.41	65.00		ATCCCTGAGCTTGCCGCACC
isotig02692	p4	(TTAT)7	4	28	298	325	F1-02692	22	59.55	59.09	248	TCGATAGACGTCCGCACCGAGT
							R1-02692	26	59.95	53.85		ACCCCACAGGACAAGAGTGATTACCG
isotig06310	p4	(TTCA)3	4	12	480	491	F1-06310	20	59.63	65.00	229	GGCACGTGGCGCGGATAGAT
							R1-06310	18	60.77	77.78		CGCTCACACTCCGGCGGC
isotig05925	p4	(TTCC)3	4	12	96	107	F1-05925	21	60.05	61.90	191	GCTGCAGAGCTGCTGCCATGA
							R1-05925	21	59.84	66.67		TCCCGGGGAGCTCATCCATCG
isotig01476	p4	(TTCG)3	4	12	680	691	F1-01476	21	60.31	66.67	223	CCGCCCAGAGTCTGCTTTGGC
							R1-01476	20	60.39	60.00		TTGCGGCAAAGGGCAGGCAA
isotig01477	p4	(TTCG)3	4	12	490	501	F1-01477	21	60.31	66.67	222	CCGCCCAGAGTCTGCTTTGGC
							R1-01477	20	60.39	60.00		TTGCGGCAAAGGGCAGGCAA
isotig07290	p4	(TTCG)3	4	12	195	206	F1-07290	20	60.25	70.00	213	GTGTCCACGTCCACCGCCAC
							R1-07290	22	59.56	63.64		CCCGAGACGAAGGGAAAGTCGC
isotig04541	p4	(TTCT)3	4	12	548	559
isotig01799	p4	(TTGA)3	4	12	21	32
isotig03760	p4	(TTGA)3	4	12	261	272	F1-03760	27	57.36	40.74	298	TGGTGAGCAATATTCCAGTGTGTTTGT
							R1-03760	21	59.85	66.67		GCACGGCGATCCTTACCACCC
isotig05873	p4	(TTGA)3	4	12	228	239	F1-05873	24	57.59	45.83	200	ACGCGATTTTCCTTGCTCAAATGC
							R1-05873	19	59.96	73.68		GGTGCCCCTGGTGGCGAAG
isotig02248	p4	(TTGT)3	4	12	1007	1018
isotig03595	p4	(TTGT)3	4	12	1026	1037	F1-03595	20	60.45	70.00	258	GCACCTGGGCATCGTCTCGC
							R1-03595	21	59.30	57.14		AGCATGCCCTCCGGATGCAAA
isotig00443	p4	(TTTA)3	4	12	2377	2388
isotig00444	p4	(TTTA)3	4	12	2377	2388
isotig00908	p4	(TTTA)3	4	12	2370	2381	F1-00908	20	59.34	65.00	273	CCCGCCACAGCCCAATGACT
							R1-00908	21	58.58	61.90		GCTGAGCCCTGAAGCTACCGT
isotig01380	p4	(TTTA)3	4	12	243	254	F1-01380	25	58.35	52.00	211	ACAACTGCCAGTCGATTATCCCTCC
							R1-01380	25	57.85	52.00		CAACAACTTCCTCAGCAGTCGAGTC
isotig01381	p4	(TTTA)3	4	12	143	154	F1-01381	26	57.13	46.15	199	TCCTCAATGGAGATAACGGAGACACA
							R1-01381	23	57.24	52.17		ACACGAAGTGGACAGACTCGGTA
isotig02031	p4	(TTTA)3	4	12	1036	1047
isotig02239	p4	(TTTA)3	4	12	1167	1178	F1-02239	22	57.40	50.00	237	TGTGTGCGCACTTTCAGCTACA
							R1-02239	20	59.97	65.00		AGACAGCGGCGTTGAAGCCC
isotig02553	p4	(TTTA)3	4	12	250	261	F1-02553	25	57.19	48.00	268	GATTCGAGACTGCACATCCCAATCA
							R1-02553	23	59.93	60.87		ACCGAGGGCCTCAAGAAGAAGGG
isotig02609	p4	(TTTA)3	4	12	591	602	F1-02609	24	57.02	50.00	292	TCCACCTGAGGACATACCCAACAT
							R1-02609	26	58.78	46.15		ACAGTGTTCACTAAATGTTGCCGTGC
isotig03398	p4	(TTTA)3	4	12	44	55	F1-03398	26	57.42	42.31	215	TGAATGACAAAGCTGAAATCGACGGA
							R1-03398	25	60.12	56.00		GCCTGAGTCGCATGAGTTTTCTCGG
isotig04342	p4	(TTTA)3	4	12	253	264
isotig04572	p4	(TTTA)3	4	12	929	940	F1-04572	20	59.43	70.00	212	GACCAGGCGTCGTCCACAGG
							R1-04572	23	59.93	60.87		CCGCCTTCTGTCCTCCAGGAGTT
isotig04813	p4	(TTTA)3	4	12	8	19
isotig04991	p4	(TTTA)3	4	12	327	338	F1-04991	20	59.83	65.00	290	AGCCTCGGTCGTATCGCGGA
							R1-04991	20	59.97	65.00		TCCCGCGAAGAGAGGCGTGA
isotig05339	p4	(TTTA)3	4	12	67	78
isotig05391	p4	(TTTA)3	4	12	763	774
isotig06701	p4	(TTTA)3	4	12	9	20
isotig01247	p4	(TTTA)4	4	16	1093	1108	F1-01247	26	59.95	53.85	281	TGGGAAATAGGGGTGAGACTGCACTG
							R1-01247	24	59.04	58.33		GCAGGGCCTTACATTTACCCCTCC
isotig00936	p4	(TTTA)5	4	20	1101	1120	F1-00936	22	58.01	54.54	285	ACGAGCTCCTTCGCTTTCAGGA
							R1-00936	24	59.25	54.17		ACCGAGTTGCTCTTCACTTACGGC
isotig02092	p4	(TTTC)3	4	12	212	223
isotig05443	p4	(TTTC)3	4	12	350	361	F1-05443	26	57.79	46.15	203	ACTGACAGATTCCTTCACTGGATGCT
							R1-05443	20	59.90	60.00		ACCGCCAATGAGCGCACCAA
isotig05712	p4	(TTTC)3	4	12	648	659	F1-05712	20	60.18	65.00	190	TGGCTGCGTACCTTCGGGGT
							R1-05712	25	59.79	52.00		GCGCTTTGGTAAGTAGCGTGACTGT
isotig07615	p4	(TTTC)3	4	12	180	191	F1-07615	26	57.32	46.15	253	GCAAGCTACATTCATACGTCAGGACA
							R1-07615	20	57.99	60.00		AAGACCGAGACGGTTGCCCA
isotig08307	p4	(TTTC)4	4	16	380	395
isotig00467	p4	(TTTG)3	4	12	1854	1865	F1-00467	23	58.19	52.17	212	TGTCATCGTCTGCTTCGTCTCGT
							R1-00467	20	60.04	65.00		AGCAGTCGGTAACGTGCCGC
isotig00468	p4	(TTTG)3	4	12	1166	1177	F1-00468	23	58.19	52.17	212	TGTCATCGTCTGCTTCGTCTCGT
							R1-00468	20	60.04	65.00		AGCAGTCGGTAACGTGCCGC
isotig01236	p4	(TTTG)3	4	12	1198	1209
isotig02594	p4	(TTTG)3	4	12	284	295	F1-02594	21	59.03	61.90	194	TCCTCACAGCTCGGCTCTCCA
							R1-02594	22	59.99	59.09		ACCGCTAAGAGGAGCCAAGCGA
isotig05266	p4	(TTTG)4	4	16	822	837
isotig05810	p4	(TTTG)4	4	16	327	342
isotig05276	p5	(AAAAT)3	5	15	618	632
isotig06053	p5	(AAAAT)3	5	15	745	759
isotig06683	p5	(AAATA)4	5	20	173	192
isotig03246	p5	(AAATT)3	5	15	1443	1457
isotig00948	p5	(AATAA)4	5	20	1083	1102	F1-00948	23	57.92	52.17	199	ACAATGGAGCGATCCCAAAGTGC
							R1-00948	20	59.26	65.00		ACGACGAGTCTGGCCCCTCA
isotig00949	p5	(AATAA)4	5	20	1083	1102	F1-00949	23	57.92	52.17	199	ACAATGGAGCGATCCCAAAGTGC
							R1-00949	20	59.26	65.00		ACGACGAGTCTGGCCCCTCA
isotig06035	p5	(AATAT)3	5	15	196	210
isotig06492	p5	(ACAGA)3	5	15	454	468	F1-06492	22	58.96	54.54	191	TGCGCACCCATAGCGAAATCCT
							R1-06492	20	59.83	60.00		TTTTGGCGCAACTCCCCGCT
isotig01534	p5	(ACATT)3	5	15	112	126	F1-01534	24	57.14	45.83	212	AGTCGGAAATTCGAAGTCATGCGT
							R1-01534	20	58.99	65.00		ACCTCAGCCGGTTGGTCAGC
isotig01535	p5	(ACATT)3	5	15	112	126	F1-01535	24	57.14	45.83	212	AGTCGGAAATTCGAAGTCATGCGT
							R1-01535	20	58.99	65.00		ACCTCAGCCGGTTGGTCAGC
isotig00802	p5	(ACTCA)3	5	15	422	436	F1-00802	24	57.71	50.00	209	GCGATCTATTCTTTCCGCACGTCA
							R1-00802	25	57.72	48.00		ACCATAAAGTAGACACACGGCTGGA
isotig00803	p5	(ACTCA)3	5	15	422	436	F1-00803	24	57.71	50.00	250	GCGATCTATTCTTTCCGCACGTCA
							R1-00803	22	58.72	54.54		TGTCGAGGCAACACTGCACTCA
isotig02807	p5	(AGTGA)3	5	15	1775	1789	F1-02807	21	59.99	61.90	200	TCCTGCCGCAGTCACGTTTCG
							R1-02807	24	57.72	50.00		CT TGTCAGGGAACTGAAGCAACTC
isotig00527	p5	(ATAAA)4	5	20	405	424
isotig00528	p5	(ATAAA)4	5	20	375	394
isotig08140	p5	(ATAAA)4	5	20	1	20
isotig07303	p5	(ATTGA)3	5	15	1	15
isotig03383	p5	(ATTTA)3	5	15	17	31
isotig05614	p5	(ATTTT)3	5	15	768	782
isotig03398	p5	(CCTTC)4	5	20	316	335
isotig02219	p5	(CTCCC)3	5	15	2529	2543
isotig01362	p5	(CTGTT)3	5	15	1076	1090
isotig01363	p5	(CTGTT)3	5	15	949	963
isotig00724	p5	(GATGA)3	5	15	1588	1602
isotig00725	p5	(GATGA)3	5	15	1588	1602
isotig06849	p5	(TAAAC)3	5	15	493	507	F1-06849	22	58.23	54.54	268	TCATGGAAGCCGGTGGTGATGT
							R1-06849	20	59.62	65.00		ACAGTGGCGCAGCAGAAGGG
isotig02494	p5	(TAATA)3	5	15	2065	2079
isotig04264	p5	(TATAG)3	5	15	635	649
isotig02022	p5	(TATAT)3	5	15	3466	3480
isotig03550	p5	(TATAT)3	5	15	943	957
isotig04143	p5	(TATAT)3	5	15	1062	1076	F1-04143	24	57.85	50.00	203	TGCTTCACTCCGGAAATCCTCTGT
							R1-04143	23	57.00	47.83		AACGCGATGACTTTGACCCTTCA
isotig07278	p5	(TCAAA)3	5	15	133	147	F1-07278	22	57.42	54.54	186	CCCATGGGAGCGTTGTTGAACT
							R1-07278	21	58.15	57.14		TCGGTGTTCCAGGCTCATGCT
isotig04608	p5	(TCAAC)3	5	15	995	1009	F1-04608	20	59.89	65.00	201	AGACGACAGCCCAGCCCCAT
							R1-04608	22	58.33	59.09		AGTCATTCCCCGTGACCTCGTG
isotig04100	p5	(TCGAA)3	5	15	149	163
isotig01248	p5	(TCGTC)3	5	15	655	669	F1-01248	20	59.35	65.00	206	TTGCTCGAGCCAGCCACCAG
							R1-01248	20	58.64	60.00		ACTGGGCGCTCAACTTCGGT
isotig01080	p5	(TGATC)3	5	15	48	62
isotig01081	p5	(TGATC)3	5	15	48	62
isotig03997	p5	(TTAAT)3	5	15	947	961	F1-03997	20	59.04	60.00	154	CGCTTCGCGCGCCCTATTTT
							R1-03997	24	58.29	50.00		ACGATGTGATCGCCCTTCATCAGT
isotig01326	p5	(TTATT)3	5	15	68	82
isotig01327	p5	(TTATT)3	5	15	68	82
isotig07965	p5	(TTATT)3	5	15	125	139	F1-07965	25	57.09	44.00	232	TGCACTTACGACGGTAAGCTGATTT
							R1-07965	22	57.35	50.00		AAAAGGCCAAGAGCAGCGAAGT
isotig05089	p5	(TTCTG)3	5	15	256	270
isotig02055	p5	(TTGAA)3	5	15	3060	3074	F1-02055	25	58.77	48.00	169	TCGCAGTCAAGGAAAATCGTAGCCA
							R1-02055	21	58.01	61.90		AGGGGCTCAGGGGTCTGTACT
isotig00789	p5	(TTTAT)3	5	15	700	714	F1-00789	20	60.32	70.00	187	ATGGACCTCCGAGGCACCCG
							R1-00789	23	58.97	56.52		TCGAGTTCGGAAGCTGGAAGCTG
isotig00790	p5	(TTTAT)3	5	15	678	692	F1-00790	20	60.32	70.00	187	ATGGACCTCCGAGGCACCCG
							R1-00790	23	58.97	56.52		TCGAGTTCGGAAGCTGGAAGCTG
isotig07265	p5	(TTTTA)3	5	15	2	16
isotig00184	p5	(TTTTA)4	5	20	7	26
isotig00185	p5	(TTTTA)4	5	20	7	26
isotig00186	p5	(TTTTA)4	5	20	7	26
isotig00187	p5	(TTTTA)4	5	20	7	26
isotig00188	p5	(TTTTA)4	5	20	7	26
isotig00189	p5	(TTTTA)4	5	20	7	26
isotig00190	p5	(TTTTA)4	5	20	7	26
isotig00191	p5	(TTTTA)4	5	20	7	26
isotig00192	p5	(TTTTA)4	5	20	7	26
isotig00193	p5	(TTTTA)4	5	20	7	26
isotig00194	p5	(TTTTA)4	5	20	7	26
isotig00195	p5	(TTTTA)4	5	20	7	26
isotig01202	p5	(TTTTC)3	5	15	656	670	F1-01202	25	57.08	48.00	203	AACGTCATACGACAATAGACGGAGC
							R1-01202	22	57.46	50.00		TGTGAACAACATCGCGAAGGCT
isotig01203	p5	(TTTTC)3	5	15	656	670	F1-01203	25	57.08	48.00	203	AACGTCATACGACAATAGACGGAGC
							R1-01203	22	57.46	50.00		TGTGAACAACATCGCGAAGGCT
isotig07558	p6	(AACTCC)3	6	18	406	423	F1-07558	20	59.12	60.00	217	TTGGGGTGCCTGTTGACGCA
							R1-07558	21	59.37	57.14		TGTGGGTGTTGGCGTTGGTGT
isotig02081	p6	(AGAACA)3	6	18	24	41
isotig01436	p6	(AGAACC)6	6	36	540	575	F1-01436	22	58.82	59.09	205	GGCATCAGGACCAGAGCAACCA
							R1-01436	20	58.83	60.00		TGGCGTTTGGACTTGGGGCT
isotig01437	p6	(AGAACC)6	6	36	480	515	F1-01437	22	58.82	59.09	205	GGCATCAGGACCAGAGCAACCA
							R1-01437	20	58.83	60.00		TGGCGTTTGGACTTGGGGCT
isotig02984	p6	(AGGGAG)3	6	18	685	702	F1-02984	20	59.55	65.00	179	TGCAGCACCAGGGTCACAGC
							R1-02984	20	59.14	65.00		GGCATCCCTGCAGCTGACGA
isotig01402	p6	(ATAAAA)3	6	18	225	242	F1-01402	26	57.46	46.15	287	TCTATGGGGTGCGATAGAAATGGTCA
							R1-01402	20	60.11	65.00		TGGAGGGCAAGCCCGTCTGT
isotig06351	p6	(ATCATT)3	6	18	77	94	F1-06351	24	57.65	45.83	202	AGTCATCAATGCGCAAACAGTGGA
							R1-06351	25	58.14	52.00		ACTTGCTTGAGAGGGAGAGAGAGGA
isotig02906	p6	(ATGCTG)3	6	18	306	323	F1-02906	25	59.84	56.00	179	CCCAACGAACTGAGAAAGATCGGGC
							R1-02906	20	59.71	65.00		GTGACGACGTCTGCACCGCT
isotig01156	p6	(ATTTTT)3	6	18	342	359
isotig03553	p6	(CAGTGA)3	6	18	518	535	F1-03553	23	59.49	52.17	186	AGGCAAACCAGGCAAGAAAGGCA
							R1-03553	21	59.85	66.67		CGAGCCATCTGGTCAGCACCG
isotig04786	p6	(CATACC)3	6	18	317	334	F1-04786	21	59.30	66.67	164	GGGTGGTGGTGGTGATGGTGG
							R1-04786	20	59.98	65.00		TTACGTGGCGCACACGGTCC
isotig06082	p6	(CCACAG)3	6	18	155	172	F1-06082	21	59.06	61.90	206	GCAACACCACCACATGCACCC
							R1-06082	20	59.15	65.00		GGCAGTGTCGACCCATCGCT
isotig00302	p6	(CCACGT)3	6	18	3853	3870	F1-00302	20	60.04	70	206	GTCTCATGCCACCACCGCC
							R1-00302	21	59.01	61.9		ACGTAGATCAGGCCCACCCCA
isotig00303	p6	(CCACGT)3	6	18	3850	3867	F1-00303	20	60.04	70	206	GTCTCATGCCACCACCGCCC
							R1-00303	21	59.01	61.9		ACGTAGATCAGGCCCACCCCA
isotig00304	p6	(CCACGT)3	6	18	3772	3789	F1-00304	20	60.04	70	206	GTCTCATGCCACCACCGCCC
							R1-00304	21	59.01	61.9		ACGTAGATCAGGCCCACCCCA
isotig00174	p6	(CCACTT)3	6	18	338	355	F1-00174	20	59.97	65	199	AGAACCTCGCCCGCTGCCTA
							R1-00174	20	59.69	65		GGGCAGGCAATGGCGGAGAA
isotig00705	p6	(CCAGAT)4	6	24	2590	2613	F1-00705	21	60.18	66.67	185	GCTGGGACAAAACCGTGGGGG
							R1-00705	21	59.60	61.90		TCGGCATCGAGTTCTGCGTCG
isotig05109	p6	(CCTCAG)3	6	18	512	529	F1-05109	20	60.25	70.00	191	CGGGAAGCTCCCGGACCAGT
							R1-05109	20	58.70	65.00		AAACCCCGGAGGAACTCGCC
isotig07482	p6	(CTCGAT)3	6	18	277	294	F1-07482	20	59.59	65.00	240	CGAACGTTTGCGCCGTCTCG
							R1-07482	20	59.51	65.00		ACACGCTCTCGCTCACGACG
isotig04758	p6	(CTCTGG)4	6	24	866	889	F1-04758	20	59.82	65.00	202	TGCCTGAGCCTGAGCCTGGT
							R1-04758	20	59.97	70.00		GGGGCATGGGAACAGGGCAC
isotig03063	p6	(CTCTTC)3	6	18	1264	1281	F1-03063	20	59.97	65.00	204	TGCATCCTCTGCCGGCTCCT
							R1-03063	20	59.70	70.00		CCAAAGGCGTCAGGTCGGGG
isotig04742	p6	(CTGCTT)3	6	18	808	825	F1-04742	21	58.93	57.14	250	TGCTGCGGCATGGCAGAATTG
							R1-04742	21	59.65	61.90		TCCTGCCGTTTGCACTCGTCC
contig00896	p6	(CTTGAA)3	6	18	357	374	F1-00896	20	60.25	70	243	GCGAGACCCAGGAGGCCTGT
							R1-00896	20	58.59	65		AGGCGGTTCTGGATCGACCG
isotig01514	p6	(GAAGAG)3	6	18	241	258	F1-01514	20	60.11	65.00	170	TGATCCCCGGGGGTTTGCCA
							R1-01514	20	60.04	70.00		TGACATCCCCCTCGCCCTCG
isotig01515	p6	(GAAGAG)3	6	18	241	258	F1-01515	20	60.11	65.00	170	TGATCCCCGGGGGTTTGCCA
							R1-01515	20	60.04	70.00		TGACATCCCCCTCGCCCTCG
isotig01412	p6	(GACCTT)3	6	18	165	182	F1-01412	25	58.40	48.00	189	GCGATGACGAAGGCAGAAAAATCCA
							R1-01412	20	60.11	70.00		GGGACGATGCGGAGGGGGAT
isotig01413	p6	(GACCTT)3	6	18	165	182	F1-01413	25	58.40	48.00	189	GCGATGACGAAGGCAGAAAAATCCA
							R1-01413	20	60.11	70.00		GGGACGATGCGGAGGGGGAT
isotig00764	p6	(GAGGAA)3	6	18	1277	1294	F1-00764	20	59.47	75.00	248	GGAGGAGGCCGAGGAGGAGG
							R1-00764	20	60.11	70.00		CATCGGCTGGAGTGCTGGGC
isotig00765	p6	(GAGGAA)3	6	18	1277	1294	F1-00765	20	59.47	75.00	248	GGAGGAGGCCGAGGAGGAGG
							R1-00765	20	60.11	70.00		CATCGGCTGGAGTGCTGGGC
isotig05897	p6	(GAGGCA)3	6	18	414	431	F1-05897	19	60.25	68.42	249	GTCCCCGCCAAAACCGCGA
							R1-05897	20	58.58	60.00		TTCGAAGTCGCAACCGCACG
isotig00706	p6	(GATCCA)3	6	18	2581	2598	F1-00706	21	60.18	66.67	185	GCTGGGACAAAACCGTGGGGG
							R1-00706	21	59.60	61.90		TCGGCATCGAGTTCTGCGTCG
isotig00705	p6	(GCATTG)4	6	24	3028	3051
isotig00706	p6	(GCATTG)4	6	24	3016	3039
isotig03408	p6	(GCTGTT)3	6	18	183	200	F1-03408	20	59.89	70.00	205	GGCTGGGGCTGGGGACTGTA
							R1-03408	20	60.25	65.00		ATCTCAAGGCCCTGGCGGCT
isotig00605	p6	(GGAAGA)3	6	18	559	576	F1-00605	20	59.54	65.00	208	AGGCGTTCGAGGGTGGGACT
							R1-00605	20	59.69	65.00		GCAGTGGCGGTGGCTCATCA
isotig02792	p6	(GGGCCA)4	6	24	1037	1060	F1-02792	20	60.04	65.00	192	ATCACGAGGCCGAGGTCGCT
							R1-02792	20	58.86	70.00		GCCAAGTCGGGCTCTCTCCC
isotig00864	p6	(GGGGAG)3	6	18	1864	1881
isotig00865	p6	(GGGGAG)3	6	18	1864	1881
isotig02324	p6	(GTCCAC)3	6	18	1946	1963	F1-02324	21	60.12	66.67	203	CCGACGCCTGTTGTCGTAGCC
							R1-02324	20	60.04	70.00		GCGACAACTGGGAGGCCGAC
isotig02328	p6	(TACTTG)3	6	18	1367	1384	F1-02328	20	59.97	65.00	190	AACGCCCAGGCTCACCATGC
							R1-02328	20	58.73	60.00		ACCAATGCGTGGCAAGTGGC
isotig02602	p6	(TCCTCT)3	6	18	770	787
isotig06023	p6	(TGCAGT)3	6	18	662	679	F1-06023	20	59.70	65.00	232	CGCACCTTCTCCGGCAGCTT
							R1-06023	20	59.90	65.00		CCTGCTGCCACCGAGCAACA
isotig00306	p6	(TGCCAA)3	6	18	2674	2691
isotig00307	p6	(TGCCAA)3	6	18	2674	2691
isotig00357	p6	(TGCCAA)4	6	24	1264	1287	F1-00357	20	60.04	70.00	200	GGACATGGAGGTGCCGGTGC
							R1-00357	20	59.97	65.00		CCGCCACCACCGAAGCCATT
isotig00358	p6	(TGCCAA)4	6	24	765	788	F1-00358	20	60.04	70.00	200	GGACATGGAGGTGCCGGTGC
							R1-00358	20	59.97	65.00		CCGCCACCACCGAAGCCATT
isotig01196	p6	(TGCTGT)3	6	18	361	378
isotig01197	p6	(TGCTGT)3	6	18	361	378	F1-01197	20	60.32	70.00	253	CCGCGAGGAGGGGTGCTGTA
							R1-01197	20	60.25	65.00		CAGACACAGCAGCAGGCGCA
isotig01222	p6	(TTAATT)3	6	18	1299	1316
isotig01223	p6	(TTAATT)3	6	18	1301	1318
isotig00823	p6	(TTCGTA)4	6	24	399	422	F1-00823	25	60.00	56.00	200	GGTCCAGGCAAAATTACGGAACCCC
							R1-00823	20	60.32	65.00		AAGCGCAGGGCGAACGAAGG
isotig00824	p6	(TTCGTA)4	6	24	117	140	F1-00824	24	58.40	54.17	161	ACTGAGGGCTTCGGAGGTTTTACC
							R1-00824	20	60.32	65.00		AAGCGCAGGGCGAACGAAGG
isotig00705	p6	(TTGGCA)3	6	18	2380	2397
isotig00706	p6	(TTGGCA)3	6	18	2380	2397
isotig00752	p6	(TTTCAA)3	6	18	165	182
isotig00753	p6	(TTTCAA)3	6	18	165	182
isotig00298	p6	(TTTTTA)3	6	18	231	248
isotig02340	p6	(TTTTTC)3	6	18	206	223	F1-02340	22	59.49	59.09	184	CGCCCAAGTTGCTGTGATTGCC
							R1-02340	20	60.11	65.00		AACCTGCCAGACGGGCCAGA
HWR9CMJ02GH4BP	c	(AAAAAT)3aaaaaatgaaattattttatatattcacgcaggctttttatactcttgctttcgag(TTTA)3attgtatttaatatttaactaatttatgtttaatgtctaaacaaaaaaattaag(TAAAA)3		155	45	199
HWR9CMJ02I17KK	c	(AAAAC)3aaaaaaaacataaaaagattaagatgaaacgctgctaca(AG)5		64	26	89
HWR9CMJ02ITZ6Z	c	(AAAAT)10aaagtaaaataaaatt(AAATA)5aaaa(AAAAT)13		160	109	268
HWR9CMJ02F7285	c	(AAAAT)3aaattagaataaatatattttctacata(ATAC)4		59	217	275
HWR9CMJ02IR12N	c	(AAAT)3actcaaatagaaatagaaaggtacgaagtgt(ATAC)4		59	277	335	F1-R12N	20	60.04	65.00	169	TGCTTCGACGCCAGCGGAAG
							R1-R12N	20	59.63	65.00		GCACACGACTCCCGCACTGT
HWR9CMJ02HGBE7	c	(AAAT)3cagtccatttcaatttcactaatttcaccacttttttcacgacaaaatcacttgtgaaaa(TATT)3		84	213	296	F1-GBE7	20	59.43	65.00	245	GCGCCCAGCAAAAAGCCTCC
							R1-GBE7	20	59.63	65.00		CGGTGGGTCGACTGCACGTT
HWR9CMJ02IX2HY	c	(AAAT)3gaaaa(AAAT)3		29	21	49
HWR9CMJ02GDBTR	c	(AAAT)4acataaataatatttgtcgtatacacatatgtatgtaattcacaaagcctaacgataacttaaac(CT)5		91	11	101
HWR9CMJ02I9P94	c	(AAATA)3ac(ATAAA)4g(TAAAA)3c(AAAAT)3taat(TAAAA)4c(AAAAT)6ac(AAATA)3		141	2	142
HWR9CMJ02IGO6E	c	(AAATA)4aataataaaaattagaataaataaaatcaaatacggtaatataaaataaaataatgtaaattaaaataaaatgaaataaaataaacaaa(TAAAT)3aaactagagtaaaataaaataaact(AAATA)4		169	93	261
HWR9CMJ02JD1PF	c	(AAATT)4(AAAAT)5		45	162	206
HWR9CMJ02IASIM	c	(AAC)6agcacaataagataaatatataaataaaatgaactaaagtcctaaacaatttcccttgccttgaaa(TG)6		96	128	223
HWR9CMJ02J069F	c	(AACC)3cgtaaccgttaactaacacgtagaaaggaacgacgacggccggactacttcctaaccaaactactaccgaaaccgaaaactaaaagta(ACG)5		115	173	287
HWR9CMJ02F80LT	c	(AAGA)3aatatttgtagaaatgtatctctgtgccagaatcgttagtggaccacatacataccccatacat(AC)5		86	189	274
HWR9CMJ02GHZWV	c	(AAGA)3agacttcgaggaggaccatgagccacttattaatat(TAAGAG)3		66	125	190	F1-HZWV	24	57.23	50.00	231	ACAGTAAGGAACACAGGGAGAGCA
							R1-HZWV	21	59.20	61.90		CCGGCGTCTGCTTACCGTTCT
HWR9CMJ02GP2XT	c	(AAT)10gg(TAA)10		62	79	140	F1-P2XT	27	57.31	40.74	254	TGCAGCAAATGAAACCAAGGATAAACG
							R1-P2XT	25	59.50	56.00		CCTCCTGAGTTGAGCTCTCTGTCGT
HWR9CMJ02I5A3I	c	(AAT)5a(AAT)12		52	338	389
HWR9CMJ02HPDA6	c	(AAT)5agcatatatacagcatttagcaacaatagtaacaatagcataattcacc(ACAGCA)3		82	196	277	F1-PDA6	23	57.38	52.17	225	TGCTAGTGACCATCAGCAGCAAC
							R1-PDA6	22	58.18	54.54		CCGCTAACAGCGCTGATGTTGT
HWR9CMJ02GPC37	c	(AATA)3aattaaataaattagaaacagtgaaacatttacatatacatatataaattaagttcgtcttttctatgatggaggtgagg(AGT)5		107	307	413
HWR9CMJ02FPR2A	c	(AATA)3tgtttattcgacacatgtatgtgtgcggcttagcaaagaacaagcacaaatatc(ATAA)3		78	6	83
HWR9CMJ02GQ68A	c	(AATAA)14(AATTA)4(AATAA)6		120	1	120
HWR9CMJ02GQJRK	c	(AATAA)8(ATAAA)3taaaataaaacaaaat(AAATA)14		141	189	329
HWR9CMJ02H9SGW	c	(AATT)3caattatattgtatataatgaacatcattttactcagttattgaata(GAAT)3		71	1	71
HWR9CMJ02IQ83R	c	(AATT)3tatttactttcattaaatttaatttaattcaaaa(TTATT)4tatttttttttattttttttattttttttttttttattttt(TTTA)3		119	228	346
HWR9CMJ02I5GYQ	c	(AATTA)3atataa(TAAT)3		33	231	263
HWR9CMJ02IE0SL	c	(AC)5atacatatgaaagaat(AATA)3		38	86	123
HWR9CMJ02ITQH0	c	(AC)5atttgaataacttttaaggtacaacagc(CAA)8		62	126	187	F1-TQH0	23	57.62	47.83	221	TCGCTGTATGTTGCAGCCAATGT
							R1-TQH0	24	58.01	45.83		AGTGCTGACAGGTTGTTTTTCGCA
HWR9CMJ02GGKFB	c	(AC)5atttgtgtatgtgtatataaatatatttag(AT)8		56	95	150	F1-GKFB	20	60.18	60.00	211	ACCGCCACCTTGCGCCATTT
							R1-GKFB	26	57.60	42.31		ACGTCAACGTTAACATTTGGACTCGT
HWR9CMJ02JSJF3	c	(AC)5gcg(CA)5		23	194	216
HWR9CMJ02HD5QJ	c	(AC)5ttacttgattagatgagagtgagtagag(GTGGA)3		53	218	270	F1-D5HQ	20	61.17	65.00	247	TACGCGCGTGTGTGCGTGTG
							R1-D5HQ	22	59.69	54.54		ACGCAAGCACGCAAGAACAAGC
HWR9CMJ02G20TY	c	(AC)7atacacataa(AC)8		40	170	209
HWR9CMJ02H2Z3Z	c	(ACA)5gcagcag(CAA)5caccaacagcaacaatactgtgcacaattgggctttagc(GGT)6		94	3	96
HWR9CMJ02IC2KF	c	(ACA)6gcagcagcaa(CAG)5		43	294	336	F1-C2KF	20	59.70	65.00	163	ATGCCCGAGTGGTGAACGCC
							R1-C2KF	22	59.44	54.54		TGGCAACGATTGTGCTGCAACG
HWR9CMJ02HXZ2J	c	(ACA)7ga(AAAT)3		35	206	240	F1-XZ2J	20	59.63	65.00	204	TCGAGTGCAGTTGCCCACCG
							R1-XZ2J	24	57.09	50.00		CCTGCCTCCTCAGTCATTTGTTGT
HWR9CMJ02G99W	c	(ACAA)3acatacatatctacttgcctacactgcctacaatgcccgtcgccgtccactcagaatgggaaaaaacgaaataaaatgaaataaaatatatatgtatgta(TATG)3		124	132	255
HWR9CMJ02GLK1A	c	(ACAT)3acag(AT)16		48	156	203
HWR9CMJ02GCWL	c	(ACAT)3agatttgtgcattttgttagcagtcagtttgtacaacacaccccatgtacaataaaagacgcttcatcgtagttggctagtgtgtac(AT)7		113	323	435
HWR9CMJ02G9M1E	c	(ACAT)3t(TGTA)4		29	106	134	F1-9M1E	22	58.59	54.54	247	GGCAAGCAAGGCAATGCTGAGT
							R1-9M1E	20	58.36	60.00		AGCGACTCTTCGGTTGGGCA
HWR9CMJ02GQRGT	c	(ACAT)4atgactaaattggcatgaaatatgaatattagcgcgca(TG)7		68	125	192	F1-QRGT	27	57.11	40.74	133	AAATTATGTGAAAGAGCGCACAAGTGG
							R1-QRGT	25	59.95	48.00		TGCTGCCACAACACAACACTTCACA
HWR9CMJ02HM2TI	c	(ACATC)4gcattgcacggggtcgaacgacagagtgtgctgctgtttaaattagctgccgcgcgagtgagagtagaagagtacgacctccgacgtctccttacgt(CACTGC)4		141	70	210
HWR9CMJ02GEMXI	c	(ACTA)4cgtaggtttaagtttaaccgtacccgaaaccaaactagttcggggtaacgggtaaagta(AAGGT)3		90	87	176	F1-EMXI	20	60.25	65.00	269	TGGGCGGGAGACGACTGCAT
							R1-EMXI	21	60.04	71.43		CGGGTACGAACCCCTACCCCC
HWR9CMJ02FH2UG	c	(ACTC)3cgcgaggggttttacactctttttaaatatcttg(TC)8		62	26	87
HWR9CMJ02F1CG7	c	(AG)18aagaaagaagagagagtagtaattaaactaaaattaatacaacaagaacaaactaagtttaacaaaaataaaaataaataaa(AAAT)3		130	204	333
HWR9CMJ02HDWMU	c	(AG)5ggtgggagaaagaaaaggtgggggagagagaggttgggg(GA)6tatggtgga(AG)5ggtgggagtgagacagagggtcg(GA)5tagggat(AG)7		134	226	359
HWR9CMJ02GV58E	c	(AG)6aaaggtggagaaggatcaccgagtgaatagaggaggtggtatcggcgtcatacagtgg(GA)14		98	274	371
HWR9CMJ02F1X7O	c	(AG)8aaagagagaaaagagac(AG)11		55	221	275
HWR9CMJ02FTDZD	c	(AG)8aaagatagagagcgagagaaagagaaaggtatgaga(AG)13		78	16	93
HWR9CMJ02HHNWH	c	(AGTTG)5(AGTAG)3		40	35	74
HWR9CMJ02I2KYR	c	(AT)11ctaa(AT)5		36	194	229
HWR9CMJ02IN5B4	c	(AT)5acagttataaataaaaaatgagcgataatgtatgatatgtaacaagtatataaaataata(AT)5		80	182	261
HWR9CMJ02IM857	c	(AT)5acttgtatatatatg(AT)5		35	119	153
HWR9CMJ02HTNYS	c	(AT)5agtacgaatgcgcacatacacataa(GT)5		45	10	54
HWR9CMJ02G54IA	c	(AT)5gaattttacacgtacatacgtattaatatcgaaattgatgtaaccg(TACA)3		68	81	148
HWR9CMJ02HNJLH	c	(AT)5gtatg(TA)6tg(TA)5		39	247	285
HWR9CMJ02JSLSF	c	(AT)5t(TA)11		33	94	126
HWR9CMJ02GONNM	c	(AT)5tttttaaacactatgcaccttataactaattttatatatttctctttaaatattgtgtttatg(GTAT)3		85	159	243	F1-ONNM	27	57.65	40.74	288	ACAATTCGGTTCTCTTTTCGGCTTTCT
							R1-ONNM	23	58.37	47.83		TGACCAGCAAATAAACGCGCACA
HWR9CMJ02IIVOS	c	(AT)6aaatgttc(AT)7		34	132	165
HWR9CMJ02G8OJZ	c	(AT)6aatatgtatatt(TA)7		38	124	161
HWR9CMJ02FOSMU	c	(AT)6gtatatgtacatatacacacac(AT)6		46	317	362	F1-OSMU	20	58.21	65.00	171	TGTGAGGGCCCGATCAGCTC
							R1-OSMU	20	59.91	65.00		TGTGCCGACGGTGTTCTGCC
HWR9CMJ02GXAFH	c	(AT)6taatgtatgtatatcaaaatatacatatgtgtg(TA)5		55	202	256
HWR9CMJ02GR4RU	c	(AT)6tta(TATT)3		27	48	74
HWR9CMJ02G3JCG	c	(AT)7aaatattgccatggcgttctaaacgcatcacaattttca(TC)5		63	285	347
HWR9CMJ02IH6M8	c	(AT)7gtatatacgtatattccggacttgccattaattagttaaatac(AT)6		69	141	209
HWR9CMJ02IYF4J	c	(AT)7gtatatatttgtaagcactaatcaactgtaaaacacaattttatgcatagaaagagtttgtaataatgtagaagaagaaatagaagaa(GAT)5		117	10	126
HWR9CMJ02IIA7T	c	(AT)7ttttgaatttataattttttttatttttattaatgctattgaaact(TA)8		76	296	371
HWR9CMJ02GR4RU	c	(AT)8ac(AT)6		30	382	411
HWR9CMJ02GFC1V	c	(AT)8g(TA)7		31	298	328	F1-FC1V	21	57.17	61.90	179	CAGGTCTCGATGACCGGAGGA
							R1-FC1V	20	59.90	65.00		GCAGCCTCCCGTGTGCTGTT
HWR9CMJ02JLU2A	c	(AT)8tacttatt(TTTTA)3g(TTTAT)3		55	55	109
HWR9CMJ02HJHG4	c	(AT)9aatcattaataaaagatattagaataatc(TACA)4		63	281	343
HWR9CMJ02JPH8X	c	(AT)9tttgaatttaacaaaatcttatgtatttttt(TA)5		59	158	216	F1-PH8X	25	57.53	44.00	242	CTCCGTGTTTTCGTTTGTGCATTGT
							R1-PH8X	20	58.35	60.00		TCCCACTAACCAAGCCGCGT
HWR9CMJ02H7PO0	c	(ATAA)3aaatgaacaaaaaatacaaaaa(AT)5		44	15	58
HWR9CMJ02I0QU8	c	(ATAA)3gta(TATG)3		27	170	196
HWR9CMJ02HRZ8H	c	(ATAA)4acaagcataaagcaccaaagacccaaagccccgaattagctccatgatttatcacctagacacgtgtctgatgcaaggatacacaatttt(TAAA)3		118	148	265
HWR9CMJ02IH4AL	c	(ATAA)4ttaaatatataaatattttacaaaat(TAAA)3		54	14	67
HWR9CMJ02GZ9ZO	c	(ATAAT)3ataaaattaaaactaaattaaactaaattaaattacattaaaaaaattaaataaaataatat(TAAA)3(ATAA)3aatagtgtaaaataaatggtttataccaaaataaagcaaac(TAAAA)3		157	16	172
HWR9CMJ02G2K33	c	(ATAC)3acacgcacttaaataaaaatttaaataaaacgcgttaaaaatactcagcgatctactatttgtatatgcagatgcac(GTAT)5		109	71	179
HWR9CMJ02JABP5	c	(ATAC)3agaacaactcaaaagcaatttacatatttttgtaacagcgtataaaagtcaaatagttaaaatgtctaactaaacaaagaaatt(TAAAA)3atattgaaaatatttatatgtacatatgcatatgtgagtatgtatgtaggtatgatttttgcttatcatatgcacacatactatacaaacatatg(CATA)4		222	38	259
HWR9CMJ02HTE4N	c	(ATAC)3atatgtacgtgctttcttactacatatacatgc(GTAT)3		57	199	255	F1-TE4N	21	59.85	61.90	153	ACGATGCTGATGACGCCCACG
							R1-TE4N	27	57.58	44.44		CCAGCGATTTTGTCGTGATTTTATCGG
HWR9CMJ02F021X	c	(ATAC)3atatgtatatataggcatatgtatatttcataaacacccac(AT)12tattaa(AT)6		95	255	349
HWR9CMJ02ISNE4	c	(ATAC)4ctatatatttcagcaaaaaaaaggaaatttacaaaaagaaaacaaattaataaataaatgtaaaacaattttgtgtgaaaattatgcataa(ATAC)3		119	126	244
HWR9CMJ02FP1IG	c	(ATC)6ctcccctcctcctcc(TCT)5		48	465	512
HWR9CMJ02H9LOC	c	(ATCAA)58(AATCA)14		360	1	360
HWR9CMJ02GZ2MX	c	(ATG)5aggaagaaacatgcgtttgatcaacttaatatattga(TG)5		62	75	136	F1-Z2MX	20	60.05	65.00	203	GCTTTTTGCCGCCGCAGGAC
							R1-Z2MX	20	57.69	55.00		AACGAAGTGCGGCCAACACA
HWR9CMJ02I01LB	c	(ATG)5gtgaggatgatgtggatgatgcggattaacgcccaatgcagcagctgctgctgccgcggccactggatgggaatgtacattcaaggggataccgcta(GCT)7		133	277	409
HWR9CMJ02GIK4I	c	(ATGT)3aagcatgtaaatggcaaattgcaatttcatttttgtcaatttaattaataatccaat(TATG)3		81	187	267	F1-IK4I	26	59.32	46.15	300	CGCTTGTGGCTTGTCGCTTTAAATGT
							R1-IK4I	20	58.51	60.00		ACGACGCACACGTTCAGCAC
HWR9CMJ02GXSDO	c	(ATGT)3accggtgcatgtgtgggcacatttcacactttaaataaatgtatatatgtac(AT)5		74	213	286
HWR9CMJ02GQITB	c	(ATGT)3actcgtatatgtcagttatacaaatatatatgactgtataat(TATG)4		70	287	356	F1-QITB	25	59.20	52.00	279	CGTTTTGTTCGCACGACTAGATGCC
							R1-QITB	26	59.48	46.15		GCGCATACATTTCATGTGCATGCTGT
HWR9CMJ02G8V5R	c	(ATGT)3atagattta(TATG)3tgtgttactagaaggaagcaggtttttacagtgccaatataagaaaccagttgagtttgtaacttctgctgctttgtcttcttttttagct(TGCA)4(TACA)3		152	102	253	F1-8V5R	22	58.51	54.54	266	ACCGGTTGTTGAGCCGATGAGT
							R1-8V5R	23	58.04	52.17		GCAGCAGTGTTGATGTTGGTGGA
HWR9CMJ02GRG84	c	(ATGT)3gtc(TGAG)4		31	215	245
HWR9CMJ02IFV25	c	(ATGT)4atacacttcgtacctttctatttctatttgag(TATT)3		60	79	138	F1-FV25	20	59.91	65.00	218	CTCCCGCACTGTGTTGCCGT
							R1-FV25	20	59.05	65.00		GTGGCATCCCCAGAGCGGTT
HWR9CMJ02I58GQ	c	(ATGT)5ttgtttatttgtggtctacaactcgcgactttataacttaacttttgtgcttaaaaatctataatatagtttgtaaatacatatg(TACA)3		117	49	165
HWR9CMJ02IAGIZ	c	(ATGTAT)3aactgcatacatatgtat(TATG)3		48	264	311	F1-AGIZ	20	60.32	70.00	299	CTCACACGAACCGGGCTGGC
							R1-AGIZ	24	58.45	50.00		ACCAACTGTTTTCCATCGCACGTC
HWR9CMJ02JA1BG	c	(ATTA)3acaaggtgtcactactcgattatttgatttaatcgcaccgcacatacgtaattttaacttttaggtacattaagccttaaatta(AT)6		108	339	446
HWR9CMJ02H6S19	c	(ATTA)3atactatacaaggt(ATTA)7		54	243	296
HWR9CMJ02IBNZZ	c	(ATTA)3atc(TATT)3tgttaatcaattaaactcttcatttgttag(TTTA)3ttcatttaaatttaattaaataatttttttatttatatatttttaatttattacttattaatttaaaaa(ATTT)3		150	25	174
HWR9CMJ02JORSS	c	(ATTA)3atcactctgttaggaccgatagattctcctatcaaagactgcgcatcacgt(TGAA)3		75	33	107	F1-ORSS	23	59.37	56.52	191	TCGATCCACTGGGGCAGAAGACA
							R1-ORSS	21	57.67	52.38		TGCAGCGTTTTATGGTGCCGA
HWR9CMJ02IP8G6	c	(ATTA)3atcactctgttggaccgatagattctccatcaaagactgcgcatcacgt(TGAA)3		73	128	200	F1-P8G6	23	59.37	56.52	188	TCGATCCACTGGGGCAGAAGACA
							R1-P8G6	21	57.67	52.38		TGCAGCGTTTTATGGTGCCGA
HWR9CMJ02ISR38	c	(ATTA)3attcaattatattgtatataatgaacatcattttactcagttattgaata(GAAT)3		74	115	188
HWR9CMJ02GP6CM	c	(ATTA)3attcaattatattgtatataatgaacatcattttactcagttattgaata(GAAT)3		74	7	80
HWR9CMJ02IFO8Y	c	(ATTA)3attcaattatattgtatataatgaacatcattttactcagttattgaata(GAAT)3		74	7	80
HWR9CMJ02HQ71P	c	(ATTA)3ggaattatcggcagtgaaattccaacgatagaggc(GGCA)3		59	115	173	F1-Q71P	23	57.74	52.17	201	TCTGGGCATTTCTCAGGCTCAGT
							R1-Q71P	20	58.91	65.00		CGGGGGTGTGCCACAGACTT
HWR9CMJ02H5MQB	c	(ATTA)3gtttttttctacgcataaatgatgtaatgtaaaatttgtgtttaagtagcatattgtaatcgtatacgttaaaacagtgaaatcctaaatgcattactc(GTAT)3		123	374	496
HWR9CMJ02JF3O1	c	(ATTG)3attaaagaaataattttcggttgattc(TTAT)3		51	123	173	F1-F3O1	24	57.20	50.00	188	TGAGATGCCCAGACGAGAATGAGA
							R1-F3O1	20	59.58	65.00		GGCTGACGCGAAAATGGCCG
HWR9CMJ02IY349	c	(ATTT)15attaataa(TATT)3aataa(TATT)3aataa(TATT)3aataa(TATT)3ttaattgtgttatattttatttgttatatttttatgtattacttatttgttaattgtagttataaaatttagctgaggctttaacaataatgattaca(ATAC)3		241	1	241
HWR9CMJ02GSM1Y	c	(ATTT)19ata(TTAT)7ttana(TTAT)3tttttattatttatttacttattaat(TTTA)20		230	1	230
HWR9CMJ02H90QH	c	(ATTT)3a(TAT)5		28	219	246	F1-90QH	24	57.52	50.00	168	AGTCGACAGCATTCCGTGACTTTC
							R1-90QH	20	58.38	60.00		TGCTGTGCCGAGTACCGTGT
HWR9CMJ02IOVJ3	c	(ATTT)3a(TAT)5		28	118	145	F1-OVJ3	24	57.52	50.00	168	AGTCGACAGCATTCCGTGACTTTC
							R1-OVJ3	20	58.38	60.00		TGCTGTGCCGAGTACCGTGT
HWR9CMJ02IT7F5	c	(ATTT)3aatattttttgatttaattatatttttttatttttgttttttataattttcttcatttactttatcatattgtaatttata(TTAAT)3tg(TATT)3		122	81	202
HWR9CMJ02JV5F1	c	(ATTT)3aatattttttgatttaattatatttttttattttttgttttttataattttcttcatttactttatcatattgtaatttata(TTAAT)3tg(TATT)3		123	20	142
HWR9CMJ02H6KDU	c	(ATTT)3attgaatttttttatttatgaatttattgataaaata(ATTT)4ttctacctaacgatttaattctataatg(TATT)3		105	1	105
HWR9CMJ02HTTMF	c	(ATTT)3cgaaacatccgtaact(AAAGCC)4		52	228	279	F1-TTMF	24	57.56	50.00	204	AGCAGACACTATTCGCTTTCCTGC
							R1-TTMF	21	58.87	61.90		GGCTTACAGCCGTTGGTTGGC
HWR9CMJ02FQ40Z	c	(ATTT)3tgctactttatttttaaaataagtagtttttg(CA)5		54	115	168
HWR9CMJ02IVNMW	c	(ATTT)3ttttctagttatttaataatttttgtctagtg(ATTT)3tctagtagtagtattttttttcattttttttattattcatttatttttatatttttatttttttctag(TTAT)3		136	34	169
HWR9CMJ02F9UB2	c	(ATTT)4attaatataattcatgttttc(CAT)6		55	162	216
HWR9CMJ02H9NFC	c	(ATTT)8atc(TTAT)5tc(ATTT)3t(TTTA)6		94	1	94
HWR9CMJ02GJKT3	c	(ATTTA)3atattattttttattaaataattttttatttcattttgtttcctttctttattttatttatttttttttatttctaattttatttatttttgc(TTTA)3		120	275	394
HWR9CMJ02IA69C	c	(ATTTA)3atttcctttttatatttaattagtatttg(TTAT)3aagccttttagaattttggtatctt(ATTTA)3		96	188	283
HWR9CMJ02HET3A	c	(ATTTA)3t(TTTA)3		28	259	286
HWR9CMJ02HGAA3	c	(ATTTA)4gtttaattttttaa(TTTAT)3		49	42	90
HWR9CMJ02IKMQ2	c	(ATTTT)19atta(TATTT)6tatg(TTATT)4tgata(TTATT)3		173	1	173
HWR9CMJ02FPBA7	c	(ATTTT)20(TATTT)12(TTATT)6tttattttat(TTTTA)5ttttta(TTTTAT)4		255	1	255
HWR9CMJ02FWLKW	c	(ATTTT)20(TATTT)3c(ATTTT)3(ATTTA)6(ATTTT)3ag(TTTAT)4		198	1	198
HWR9CMJ02ICGOM	c	(ATTTT)22ta(TTTTAT)3(TTTATT)5tttag(TTTTAT)4		189	1	189
HWR9CMJ02H53VP	c	(ATTTT)23(TATTT)4(AATTT)3		150	1	150
HWR9CMJ02HO7Y1	c	(ATTTT)4(ATTTA)4ttttattttgttttattttatttaatttatttgatttatttata(TTATT)3tgtattagtc(TAATT)3		124	1	124
HWR9CMJ02G46GP	c	(ATTTT)4atta(TATTT)3tattatat(TTTTA)16		127	52	178
HWR9CMJ02IP269	c	(ATTTT)4cgctttaatc(TATTT)3tcttctattttgtttcaatttatttc(ATTTT)3		86	30	115
HWR9CMJ02IUA6A	c	(ATTTT)8ang(TTATT)3ttangttattttat(TTTTA)3nattat(TTTTA)5tttttattttat(TTTTA)3t(TTTTA)3		161	1	161
HWR9CMJ02IWH1R	c	(ATTTT)8atc(TTATT)5tc(ATTTT)3tt(TTTTA)6		117	1	117
HWR9CMJ02HTC5B	c	(ATTTT)9ac(TTTAT)8		87	26	112
HWR9CMJ02J03DP	c	(ATTTTG)15at(TTTTGA)6t(TTTTGA)4tttttgat(TTTTGA)16(TTTGAT)5ttttagattttgatttttgattttagatttttgattttgattttgtattttgattttgattttcgattttgattttgtattttgat(TTTTGA)5		403	1	403
HWR9CMJ02H0DMH	c	(ATTTTT)3tatttattttaattttgtatatttcattttataatattttgttttg(ATTTT)3		79	307	385
HWR9CMJ02F0M3R	c	(ATTTTT)3ttta(ATTTTT)3		40	655	694
HWR9CMJ02I7T4V	c	(CA)5cgcatacactcagatattggtaaaatcgtaaatttaattttatgcgattattttagtacttttttacaataataattaataataaattttgcatggtga(TC)6		121	181	301
HWR9CMJ02HN6I7	c	(CA)5tgtaggtatattctacttctct(TCA)9		59	100	158
HWR9CMJ02H8G9H	c	(CA)6tatgcagttgtttatgagctcatgtactatatatagatatatagatctgtgtgtataagcaaatttatgttgaaaaccacaaat(AAAC)3		108	309	416
HWR9CMJ02GX5RN	c	(CA)7tag(ATAC)3		29	238	266	F1-X5RN	22	59.74	59.09	217	GCCCGAAATTTTGCCACAGGGC
							R1-X5RN	21	59.32	57.14		TGCTGCACTCAGCTTCAGCGT
HWR9CMJ02GOTE3	c	(CA)7tgcgcgctaatattcatatttcatgccaatttagtca(TATG)4		67	127	193	F1-OTE3	25	59.95	48.00	133	TGCTGCCACAACACAACACTTCACA
							R1-OTE3	27	57.11	40.74		AAATTATGTGAAAGAGCGCACAAGTGG
HWR9CMJ02JMIG5	c	(CAA)5caccaacagcaacaatactgtgcacaattggctttagc(GGT)6		71	24	94	F1-MIG5	22	57.35	50.00	197	GGCAACAACAACAACAGCAGCA
							R1-MIG5	20	59.76	65.00		CGGCAGCGGTGGGTGCTAAT
HWR9CMJ02GR7C4	c	(CAA)5caccaacagcaacaatactgtgcacaattgggctttagc(GGT)6		72	24	95	F1-R7C4	22	57.35	50.00	198	GGCAACAACAACAACAGCAGCA
							R1-R7C4	20	60.39	65.00		GCGGCAGCGTGGGTGCTAAT
HWR9CMJ02FYQNE	c	(CAA)5tacaatcatgtacaacagcatcaatacgatgatgttaatcagcagttg(CAA)6tatcagcaacagcaaaagtatatcaataattttcatgttgcagcaacagcaag(CAA)5tacaatcatgtacaacagcatcaatacgatgatgttaatctagcagttg(CAA)6		216	41	256
HWR9CMJ02F1HLW	c	(CAAC)3ccgtaccgttaactaactacgtaagaaaggaacgacgacgggccggactacttcctaaccaaactactaccgaaaccgaaaactaaaagta(ACG)5		118	136	253
HWR9CMJ02FKY89	c	(CAAT)7caaacaacatgctgccaaataaagaaatattgaaattgaagacaatgataatgatacat(GATGAA)3		105	329	433	F1-KY89	23	59.57	52.17	211	ACCAGCTTGTGCTCGAAAACCGT
							R1-KY89	22	59.19	59.09		GCTTCGCATCGCCTTTCATCCG
HWR9CMJ02GV8K7	c	(CACT)3ctccttcactccctctctctgtcgctctctctgcggctggtaaacccgtgctcctggtgccgccactgccgtgcaacngaaaagtgagccaacgaataa(AT)5		121	327	447
HWR9CMJ02FJBYU	c	(CAG)5cgtttgcggcaactagacgactttgatgctaattatattttatagtttacaag(ATAC)3		80	4	83
HWR9CMJ02HWTBD	c	(CAG)6catcagcaacagcaaattaaaaaatcacccgaaaaaatggtgctgcaaagctatgaaaattatacctcttaccataatttgcccactcatgt(TCA)5		125	16	140
HWR9CMJ02HDGED	c	(CAG)7caacagcaaggcgcagtaaataataatagcaattacagcttcaataagctt(CAA)6actgatgtatccccatcgtcttctacttcttccacgcaacagcagcaacaacaagatttttatagcagactg(CAA)6		180	74	253
HWR9CMJ02HRKZO	c	(CAT)5cct(CATCGC)3		36	39	74	F1-RKZO	20	59.97	65.00	180	TTGGCACCATCGCTGCTGGG
							R1-RKZO	21	58.15	57.14		GCCAATGGCGATCTCGTTGCT
HWR9CMJ02H4TWV	c	(CAT)5ctgctgcatggc(CAT)5		42	293	334	F1-4TWV	22	59.25	59.09	195	GCAACCTCGTGCCATCAACAGC
							R1-4TWV	20	60.53	65.00		GCTGCCCATGCCAGTGCCAA
HWR9CMJ02HR5AG	c	(CATA)3atacatatgtatgcagt(TATACA)3		47	293	339	F1-R5AG	22	60.18	59.09	263	CGCGAGCGACGACATTTTTGCC
							R1-R5AG	19	59.75	73.68		GGCCTGGCTGCAGGGTACG
HWR9CMJ02JP273	c	(CATA)3tatacatatgtatatg(TA)5gtatatttacaaggcatgtctcgcttgcggcaataaccggaaaggacacactctacgcatatacca(ACAT)4		120	90	209	F1-P273	22	59.99	59.09	235	GCTCAAAGTCACTGCGACGCCT
							R1-P273	20	59.51	65.00		GGCGGCAAGCAAGCGAGAAC
HWR9CMJ02IBB1M	c	(CATA)3tcatatgtaatat(TACA)4		41	54	94
HWR9CMJ02H78AR	c	(CATA)3tgtatgtattctaggagggcactcatttccttgttgcctgtcagttgttgaaatgaatgaagcattgtcgacgaggaatacatacatatgc(ACAT)4		119	47	165
HWR9CMJ02FOU0H	c	(CATA)6cgtaa(ATAC)3		41	413	453
HWR9CMJ02HM2GY	c	(CCACCG)3tacgaactgtagcgtccaccgccgccgccg(CCA)5		63	421	483
HWR9CMJ02FYRCU	c	(CT)5gtgcctcta(TC)10		39	99	137
HWR9CMJ02GNX78	c	(CT)6cctgttgtctccgtgtaataaataattaatatatctaaatgactatttgtacatcttcatttattaatttattatttattacacggagacaacag(GA)6		119	58	176
[truncated: 4,649 more rows]
